# Supplementary material
Source: publisher figshare collection journal article supplement (https://frontiersin.figshare.com/ndownloader/files/34460978)

Figure S1

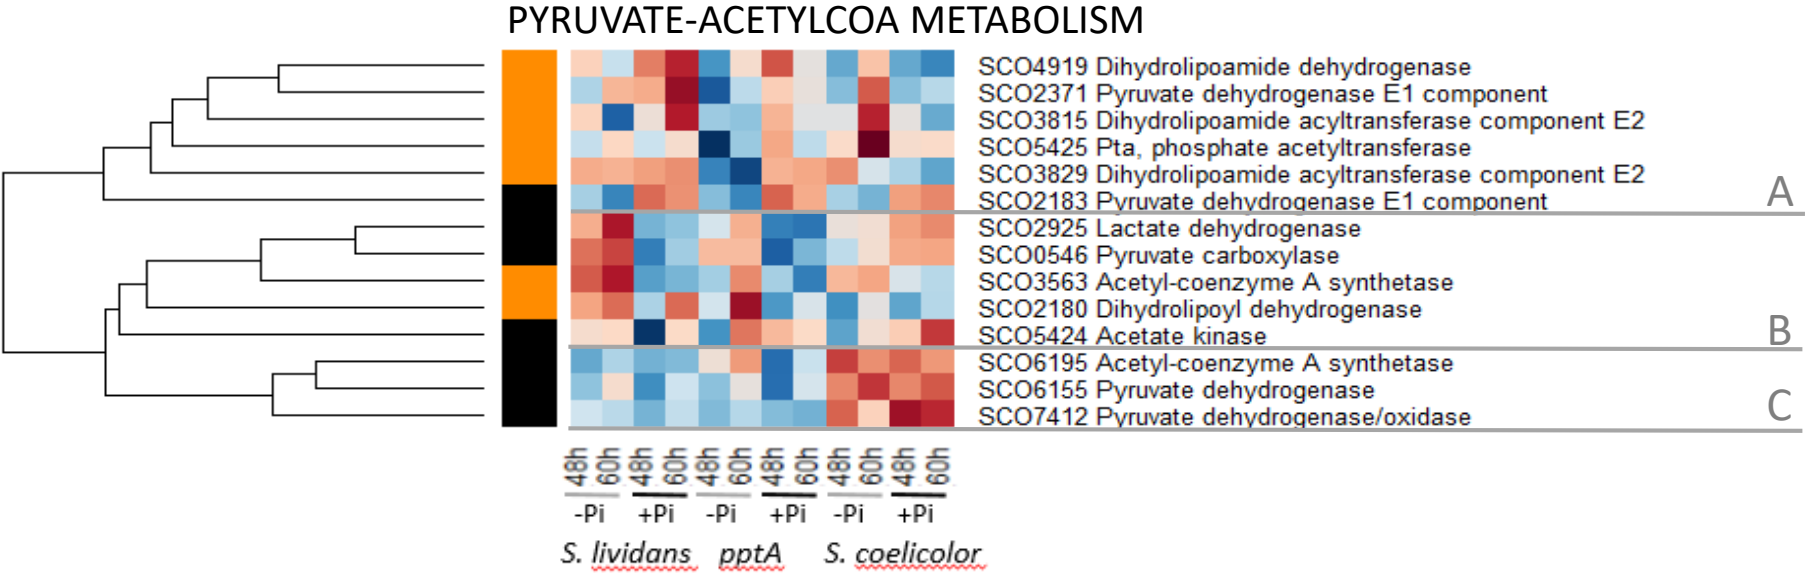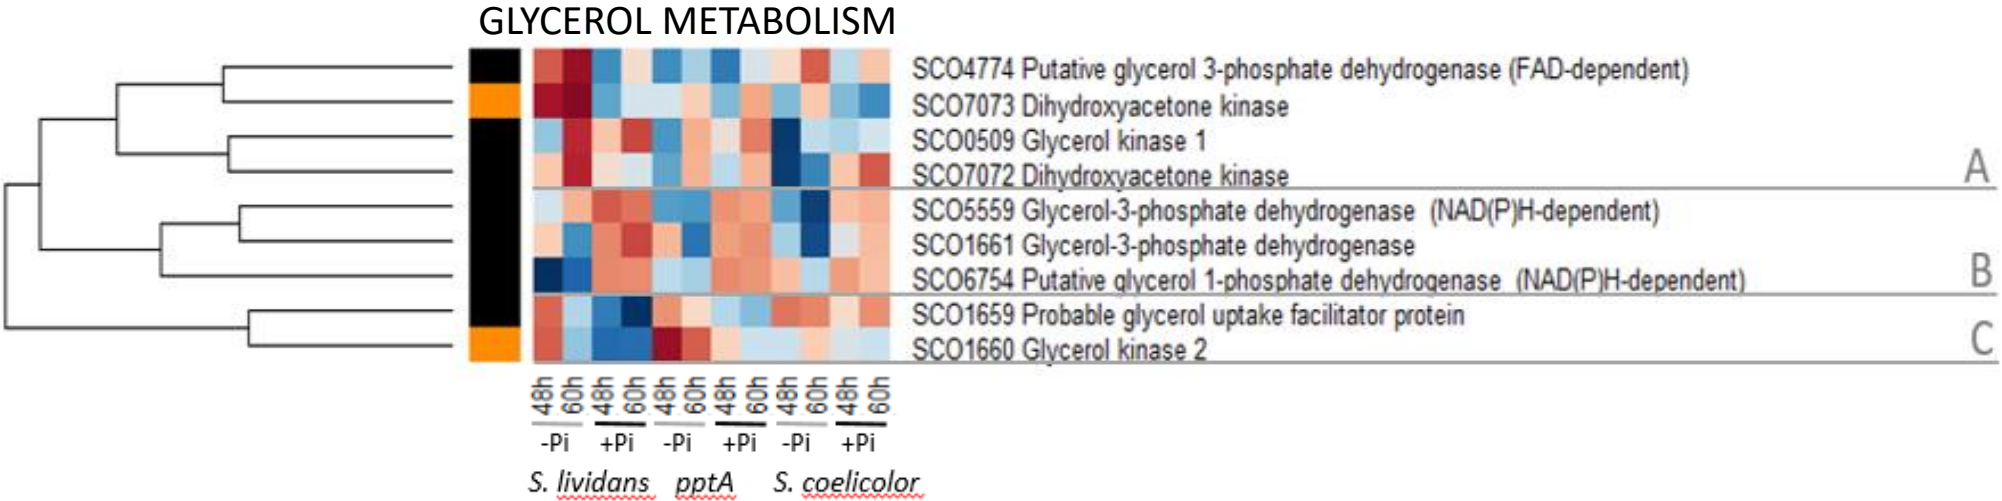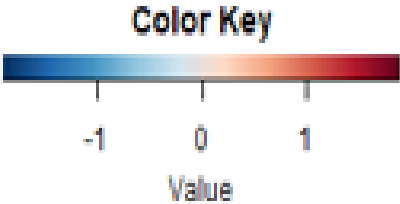

Figure S2A

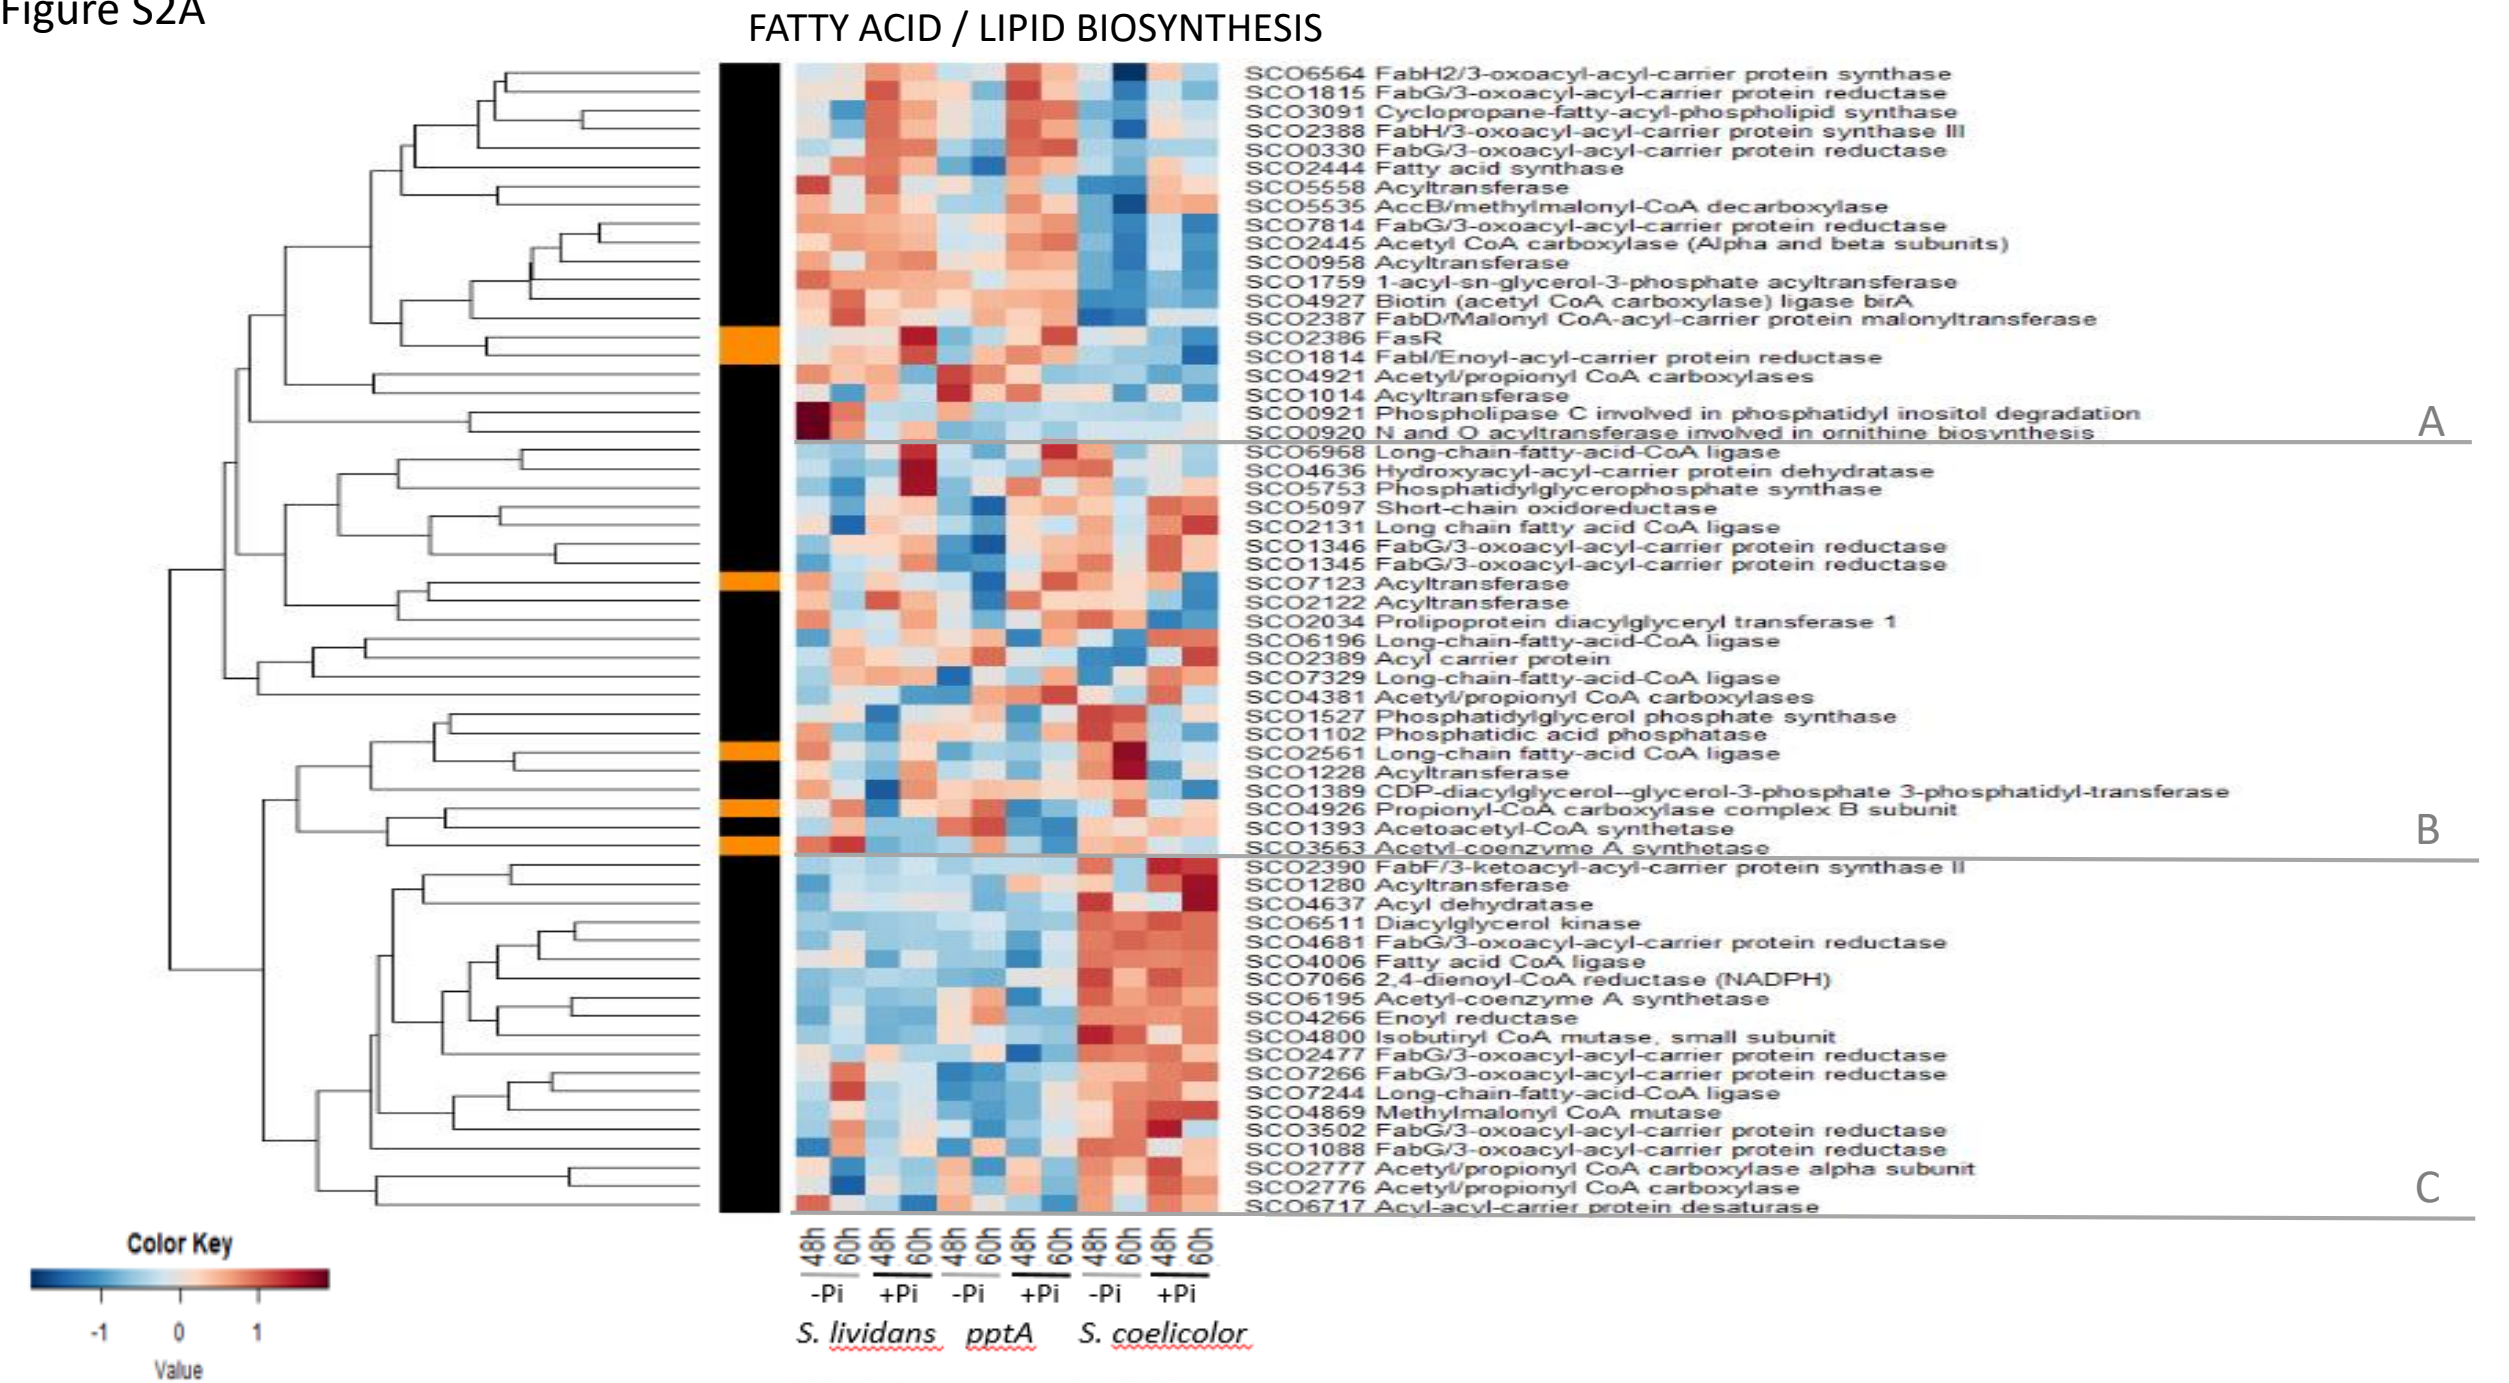

Figure S2B

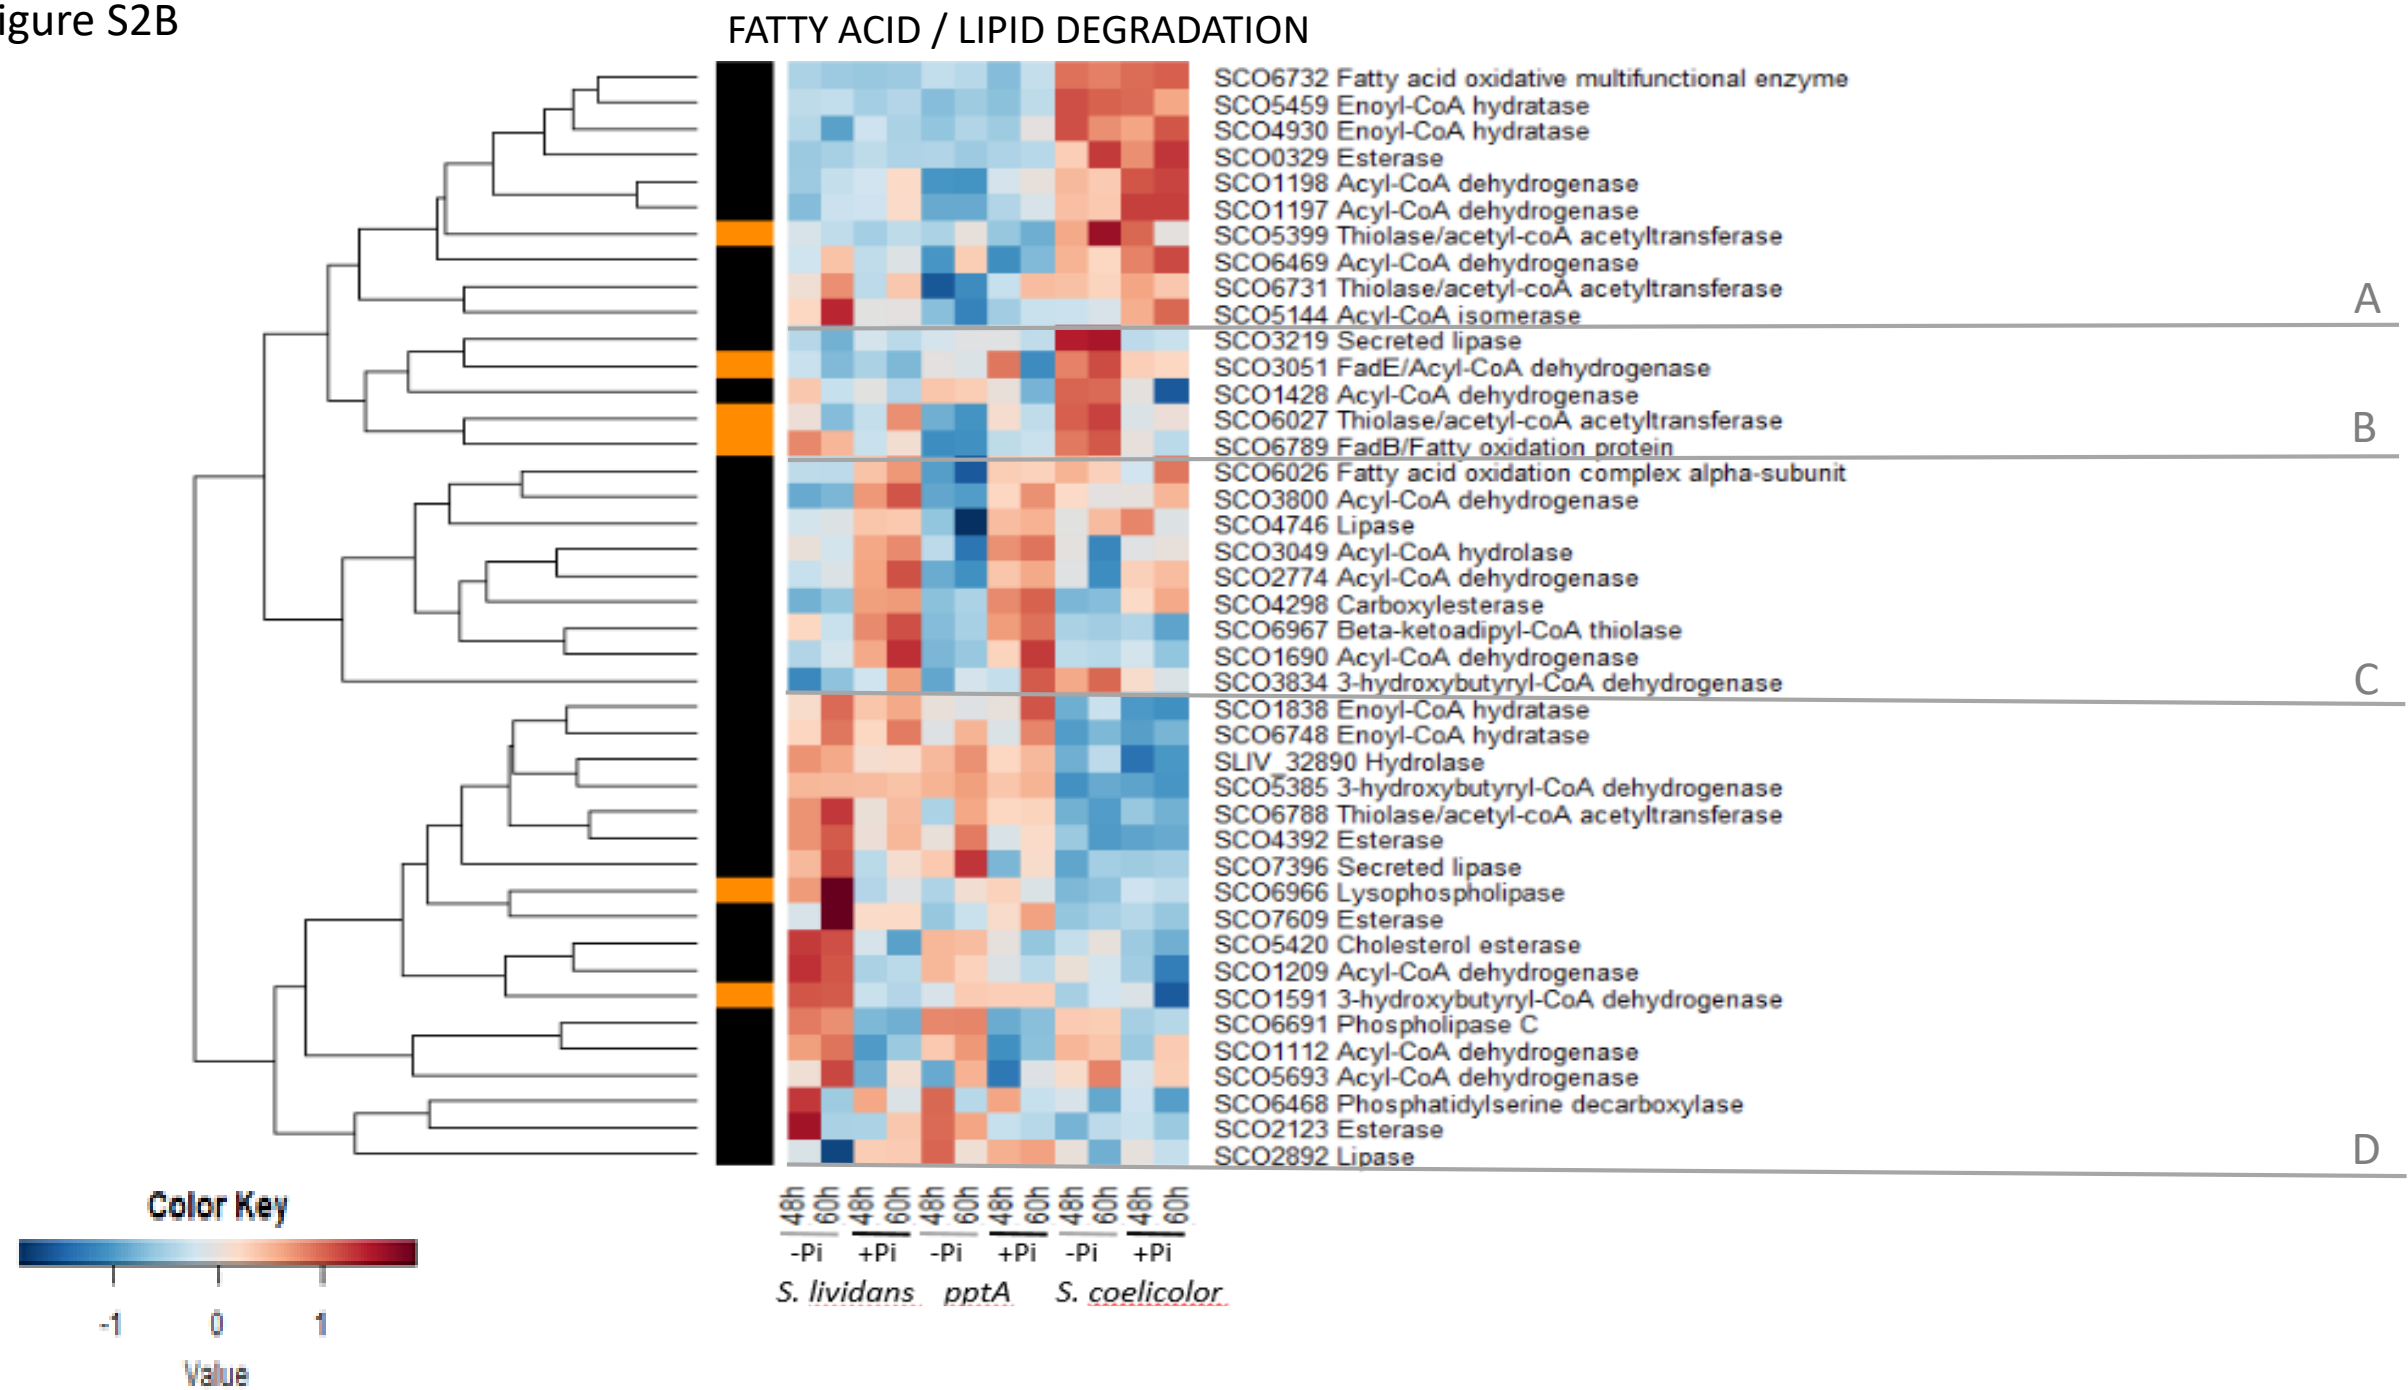

## AMINO ACID BIOSYNTHESIS

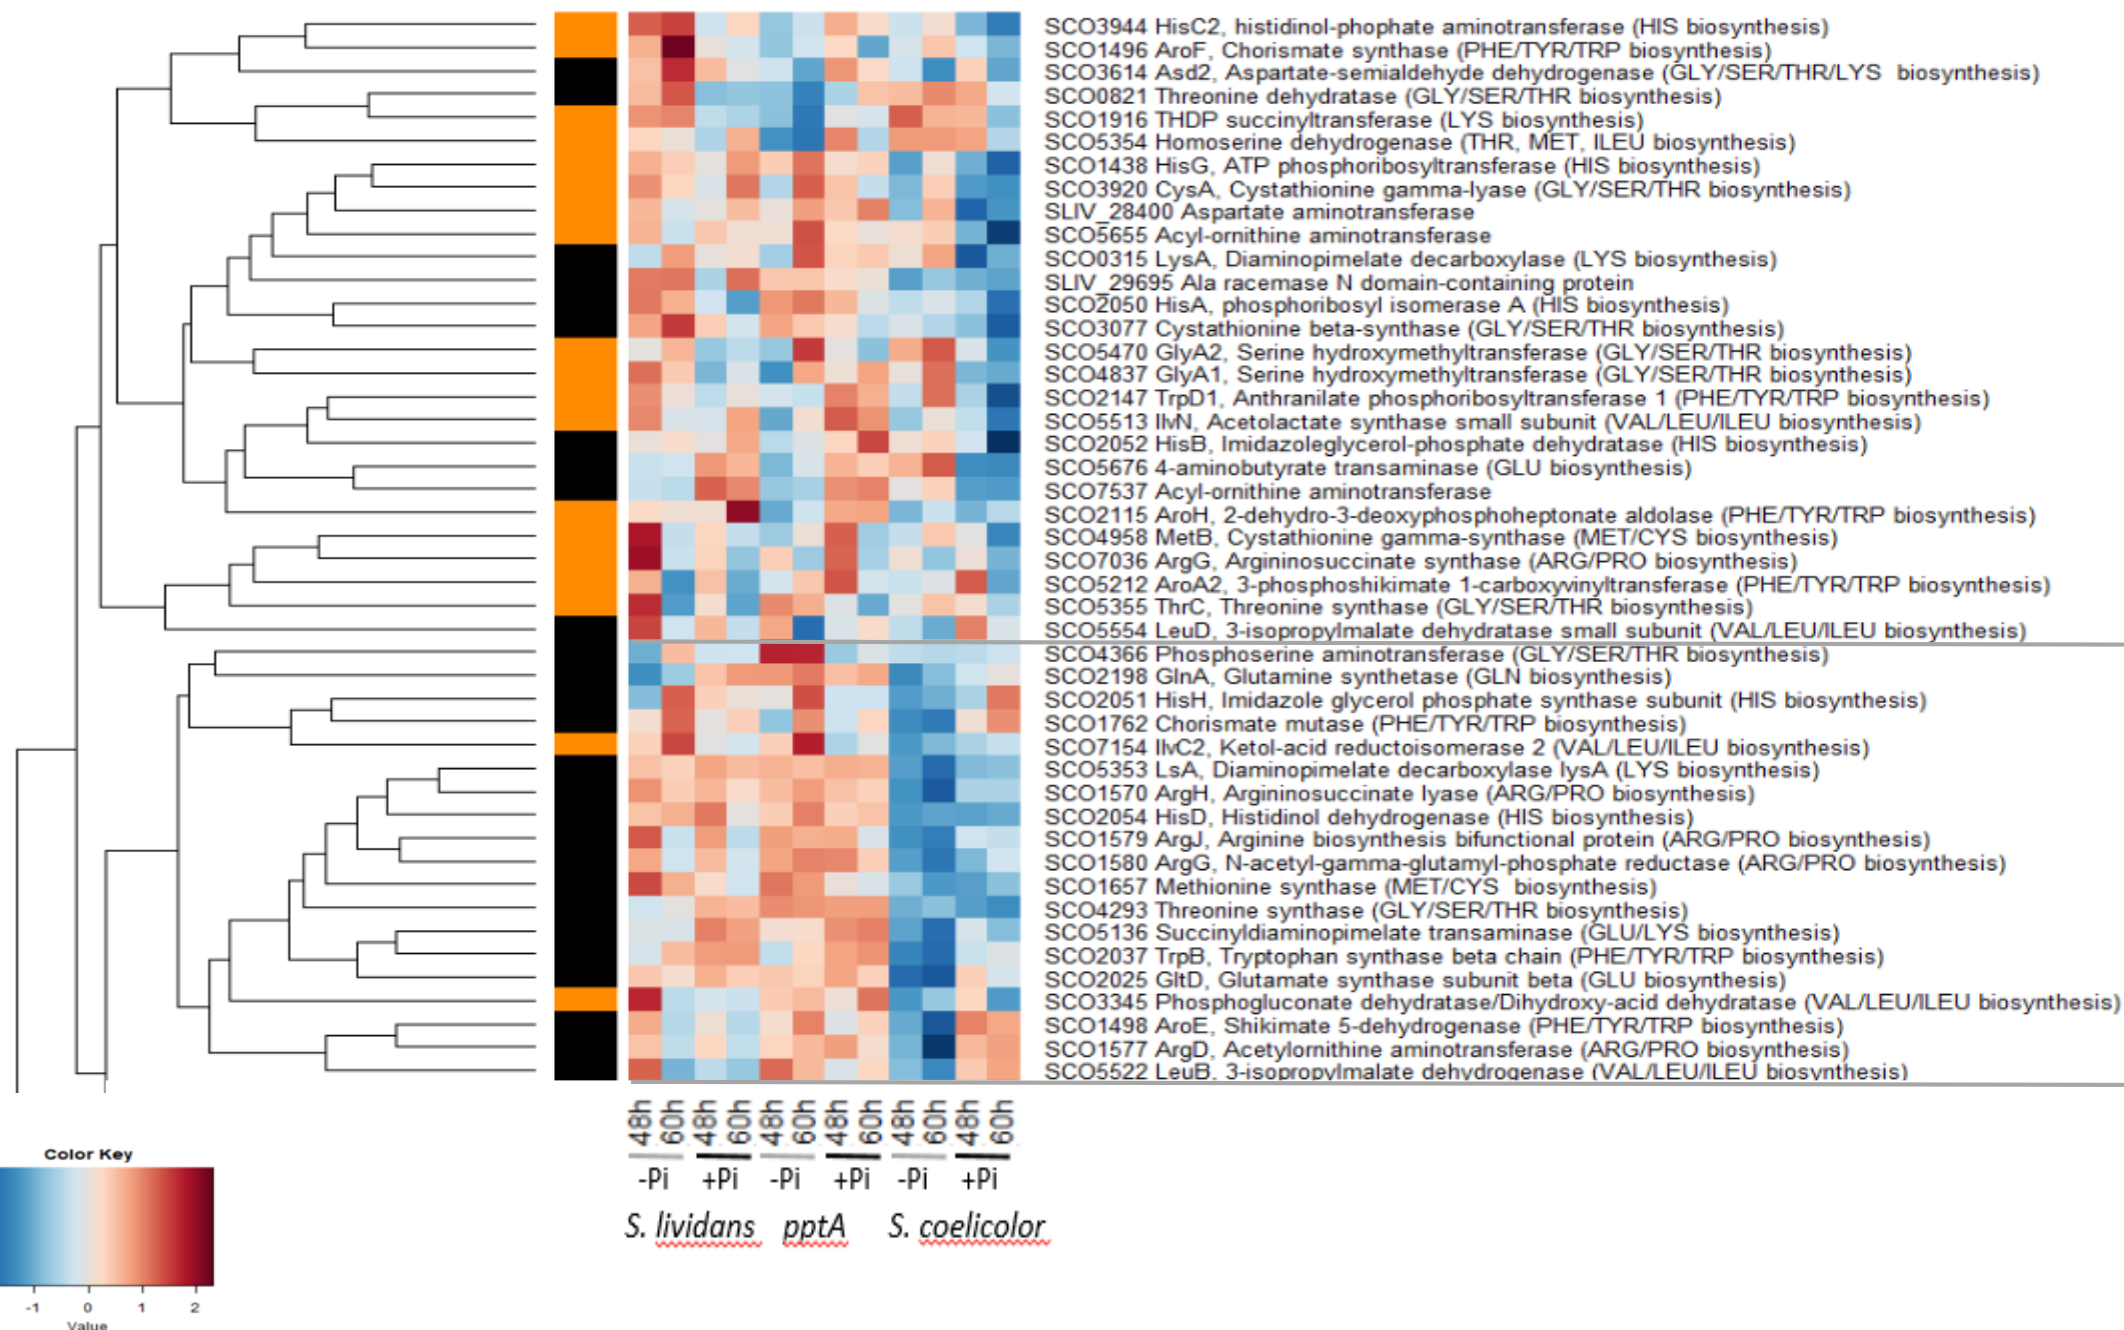

Figure S3B

AMINO ACID BIOSYNTHESIS

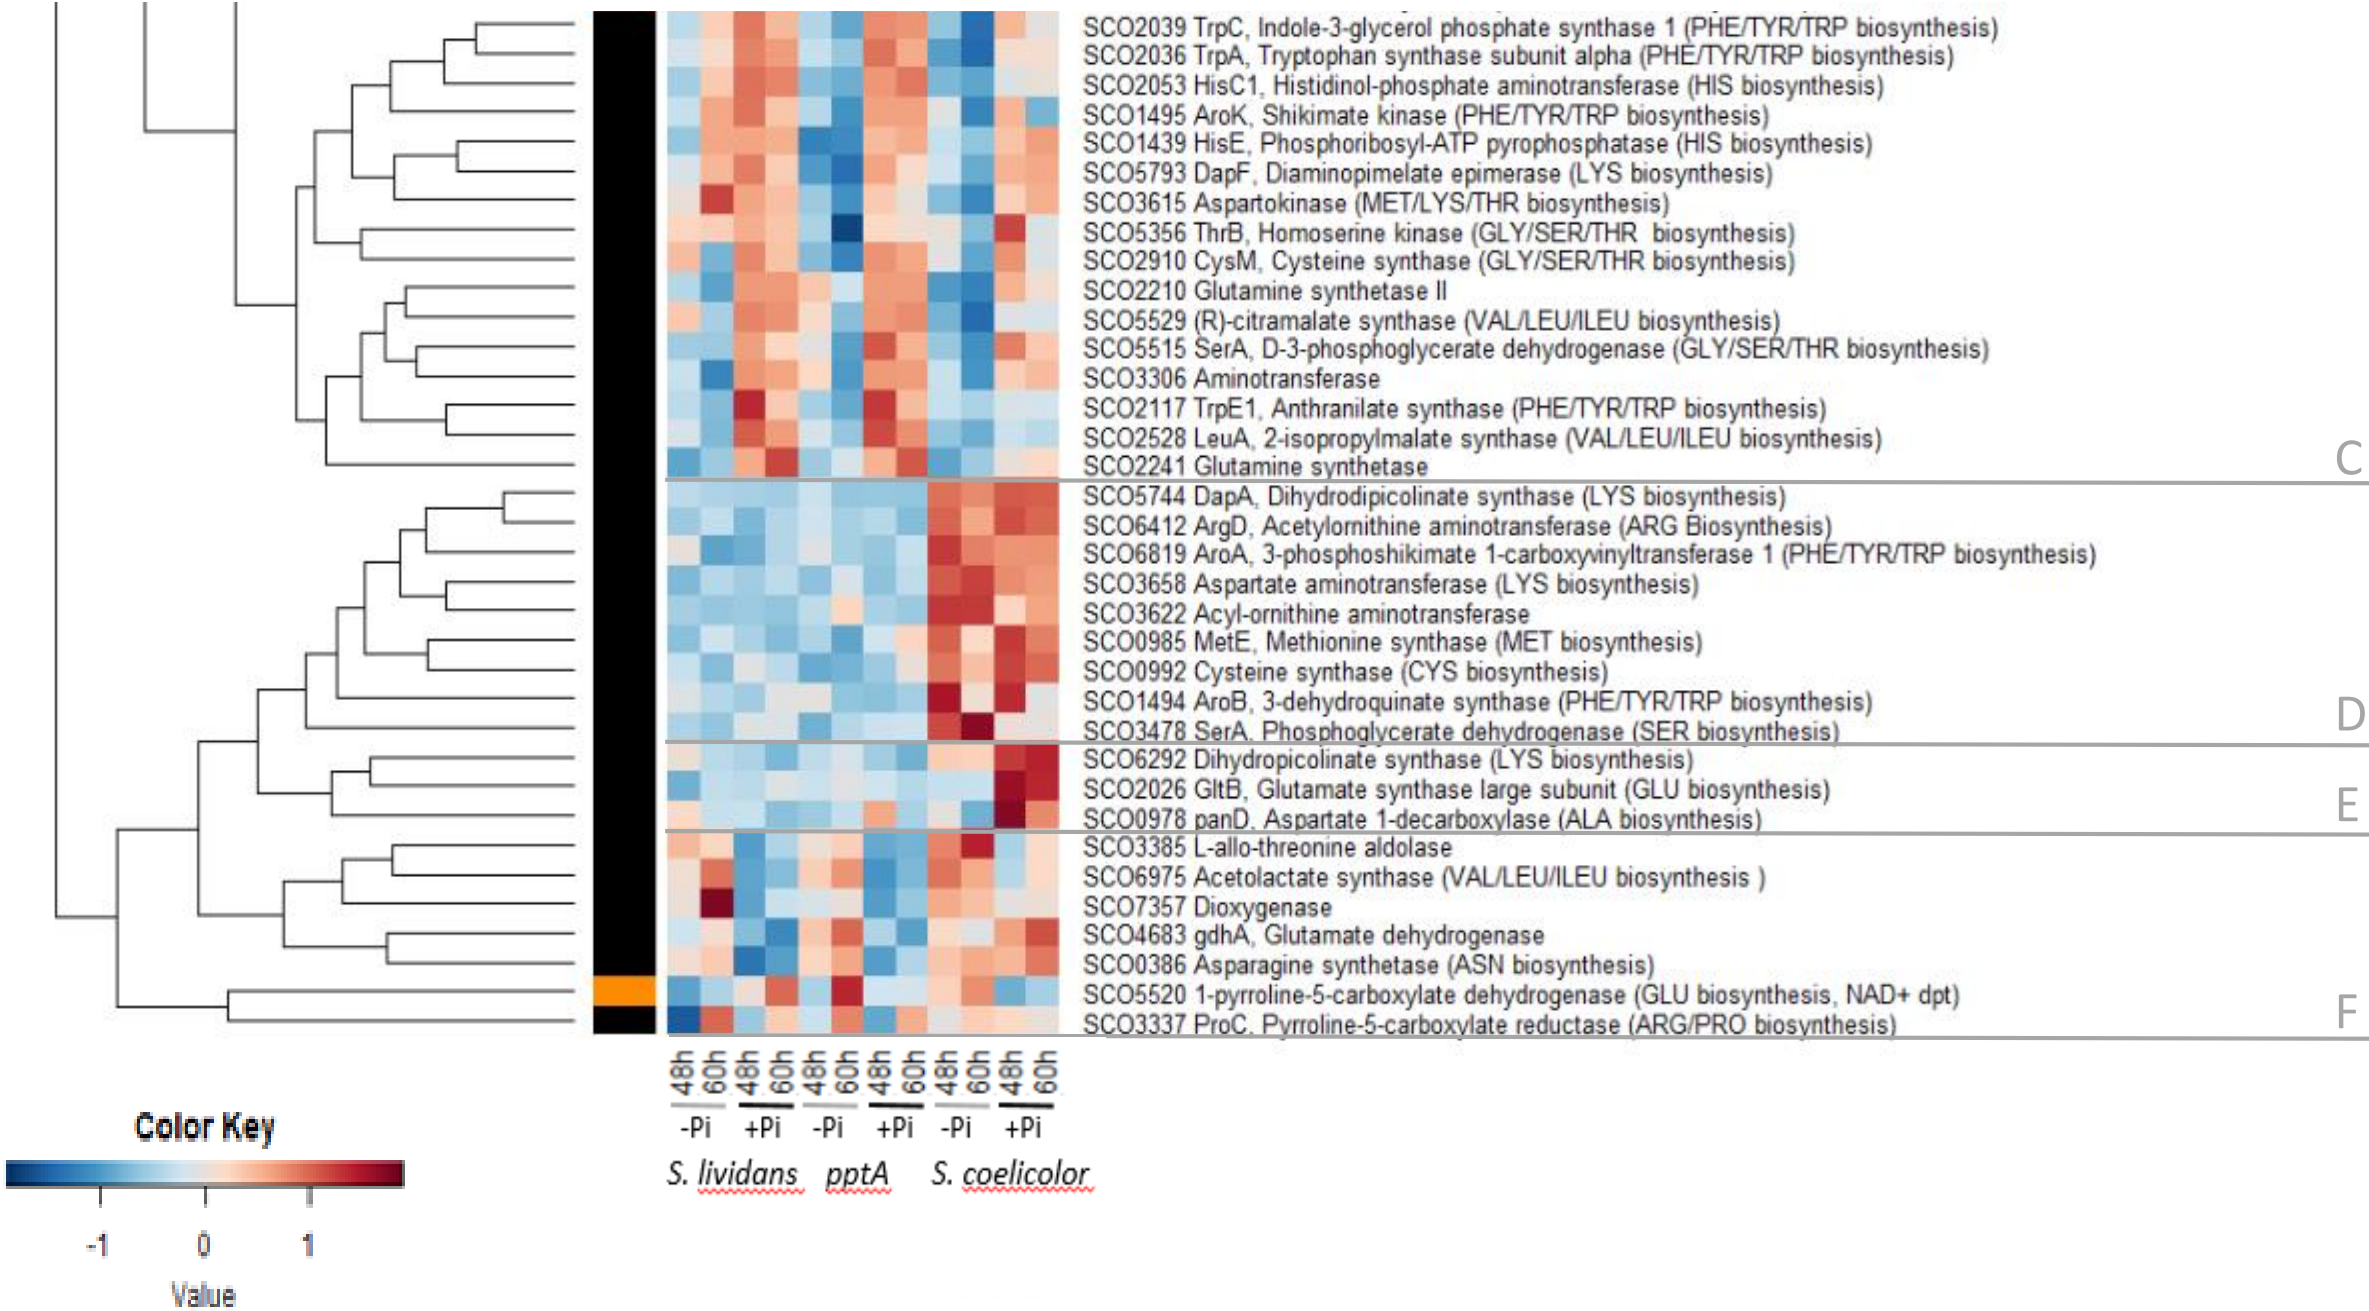

Figure S4A

AMINO ACID DEGRADATION

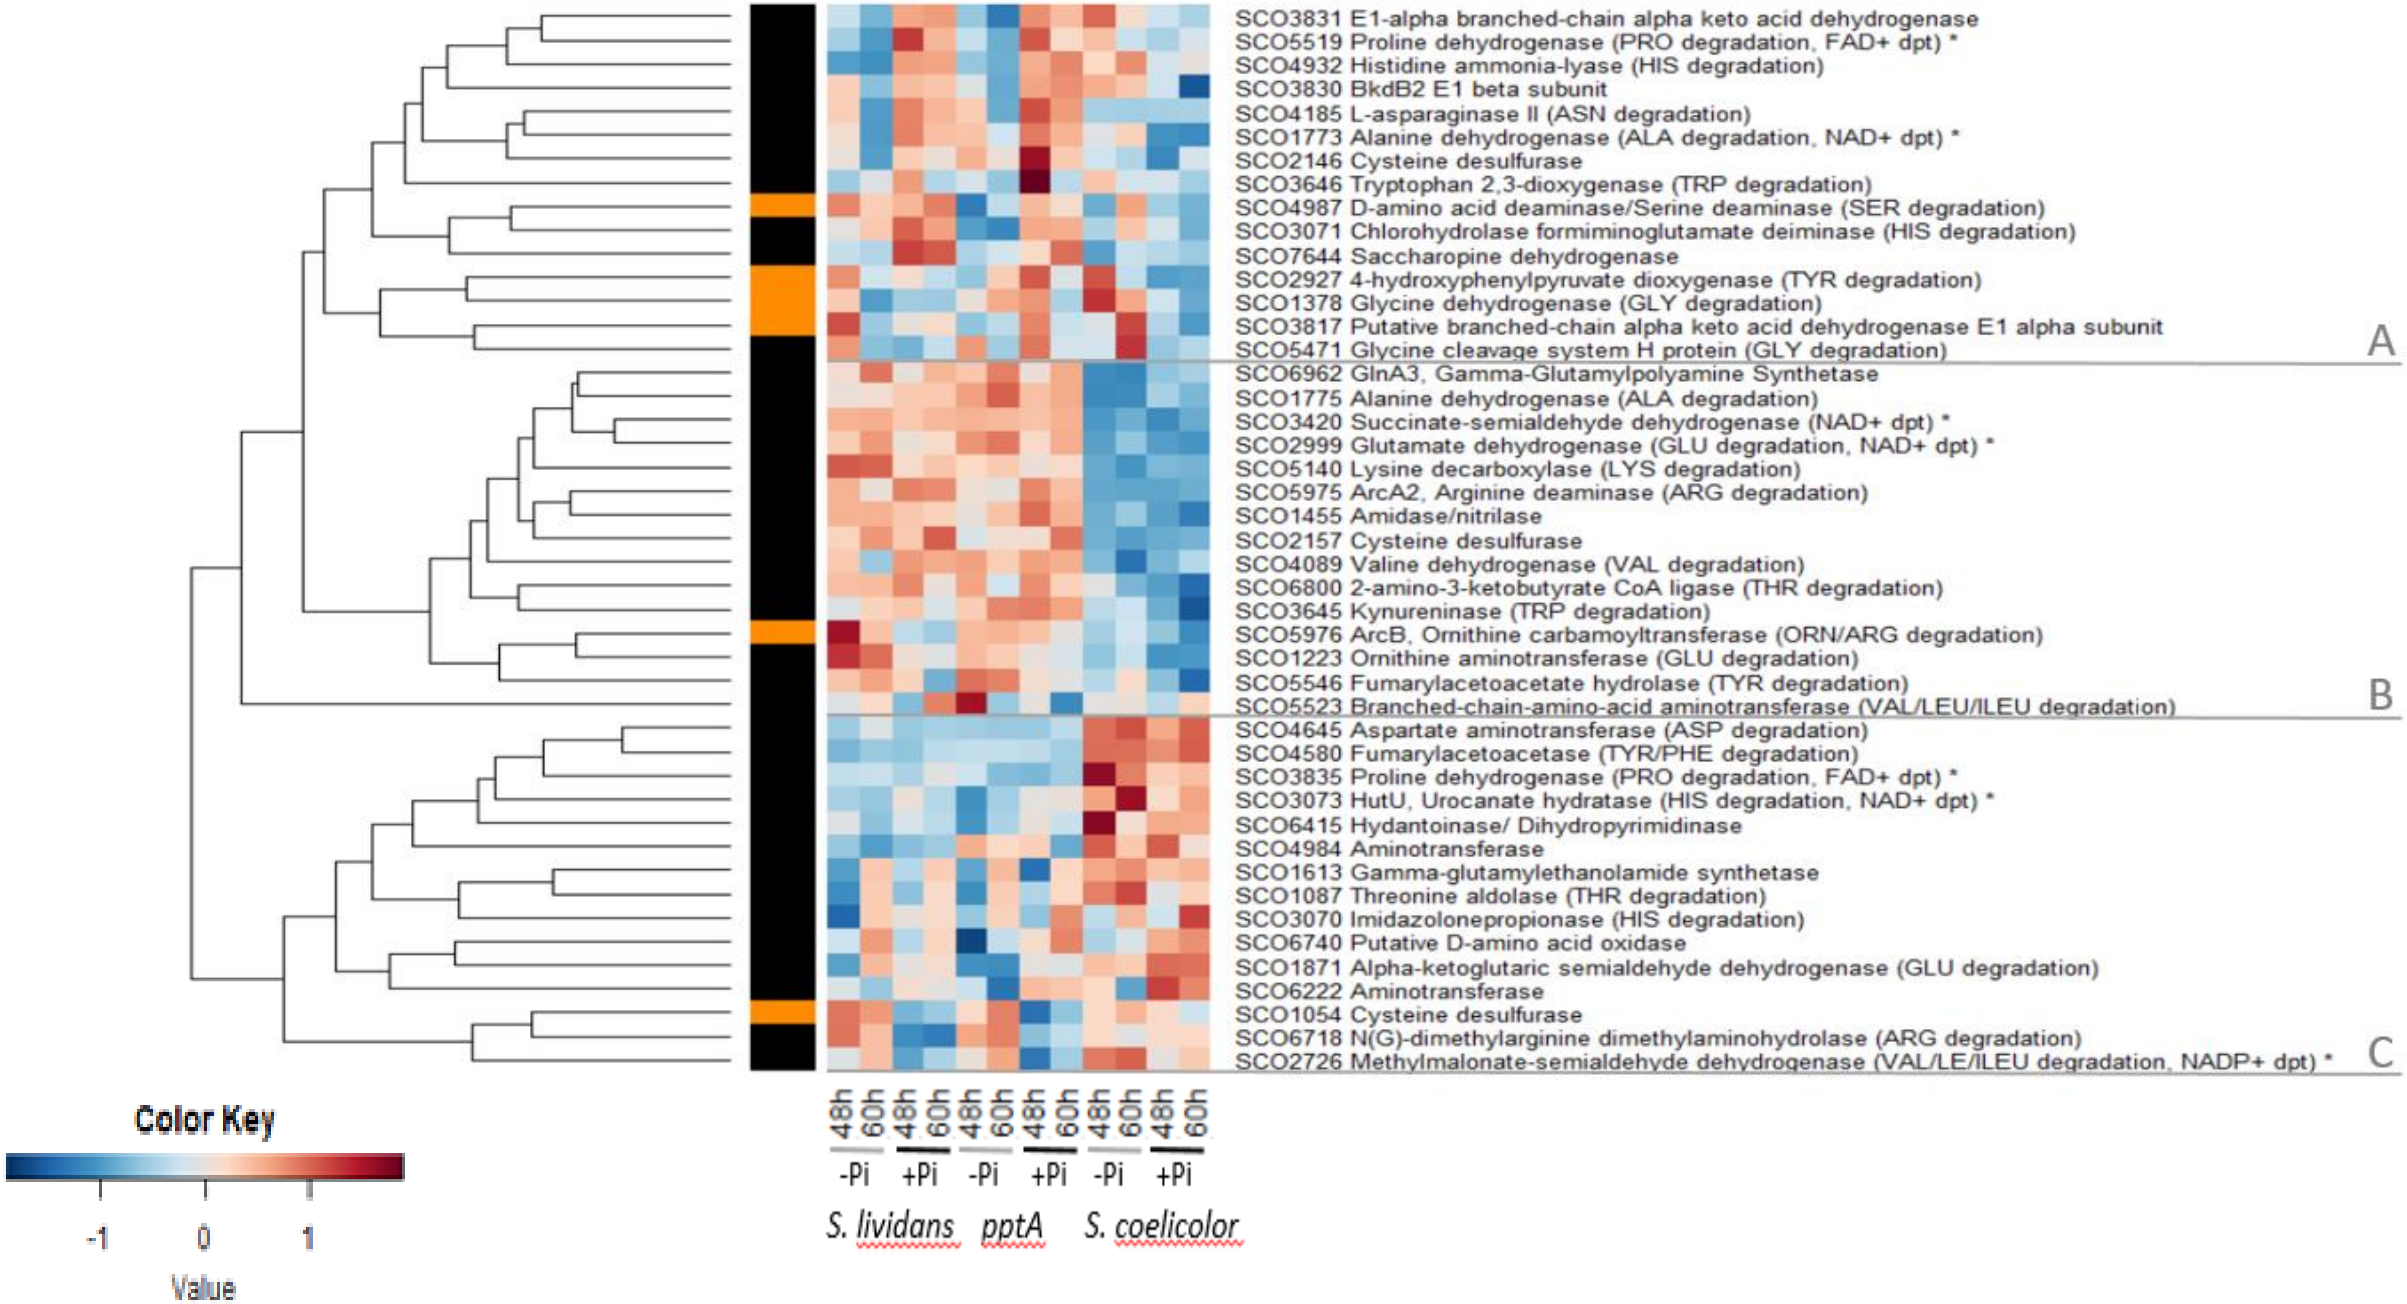

Figure S4B

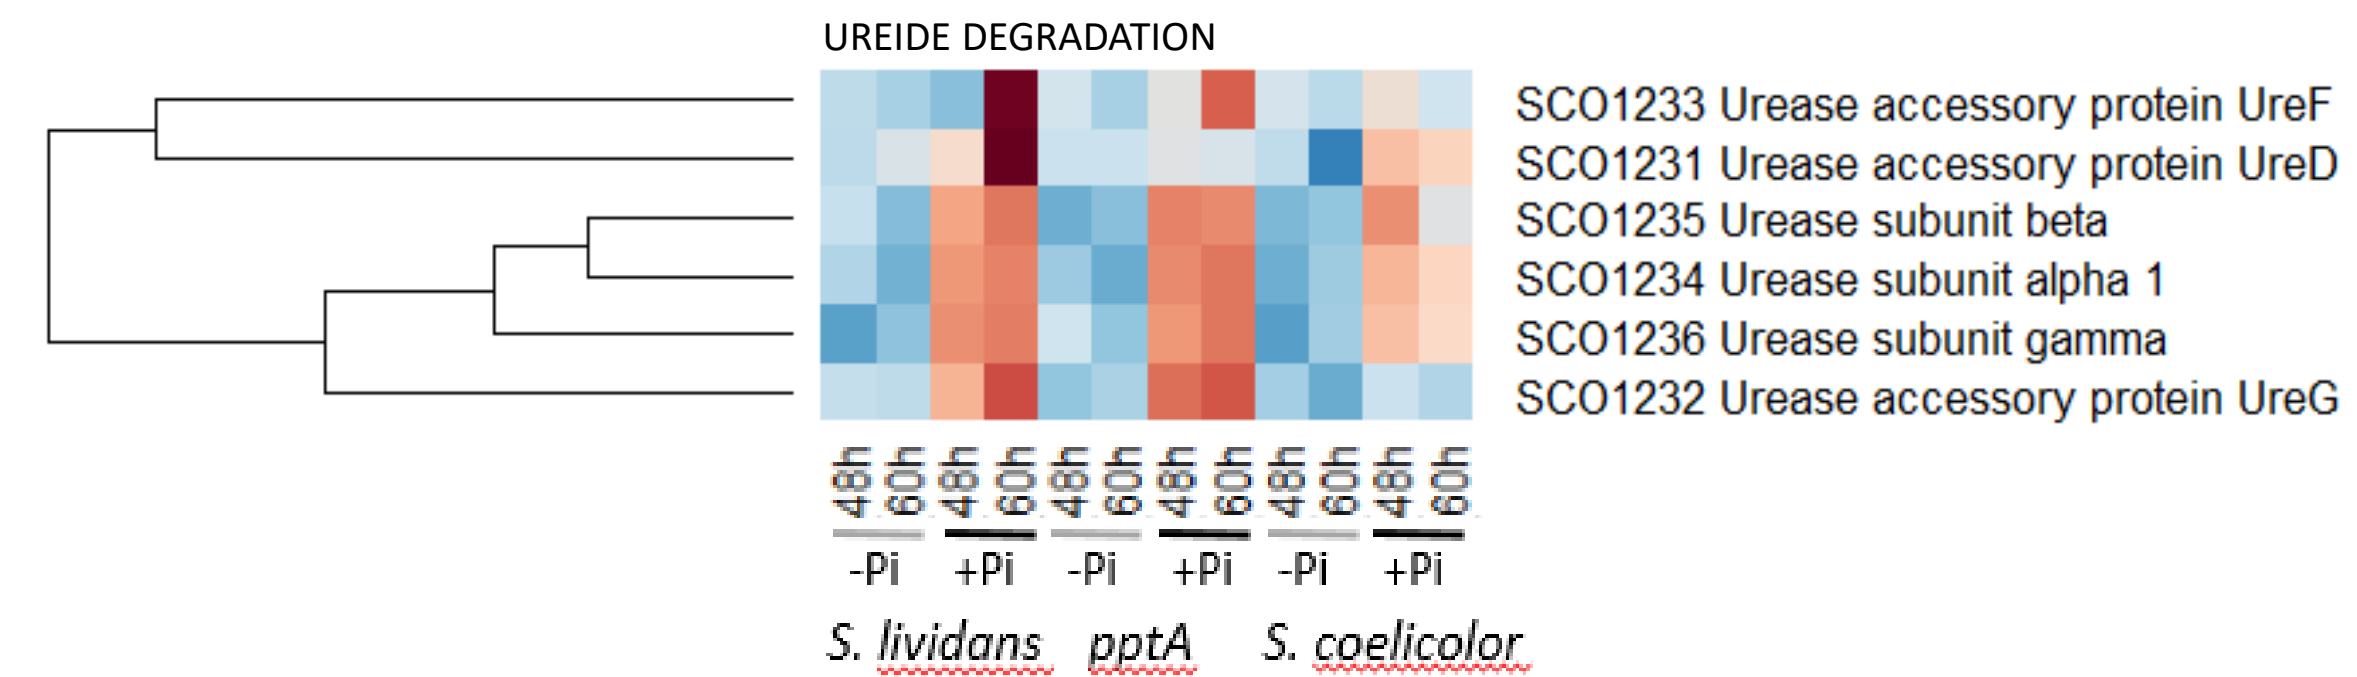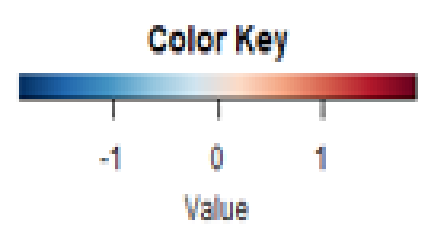

Figure S5A

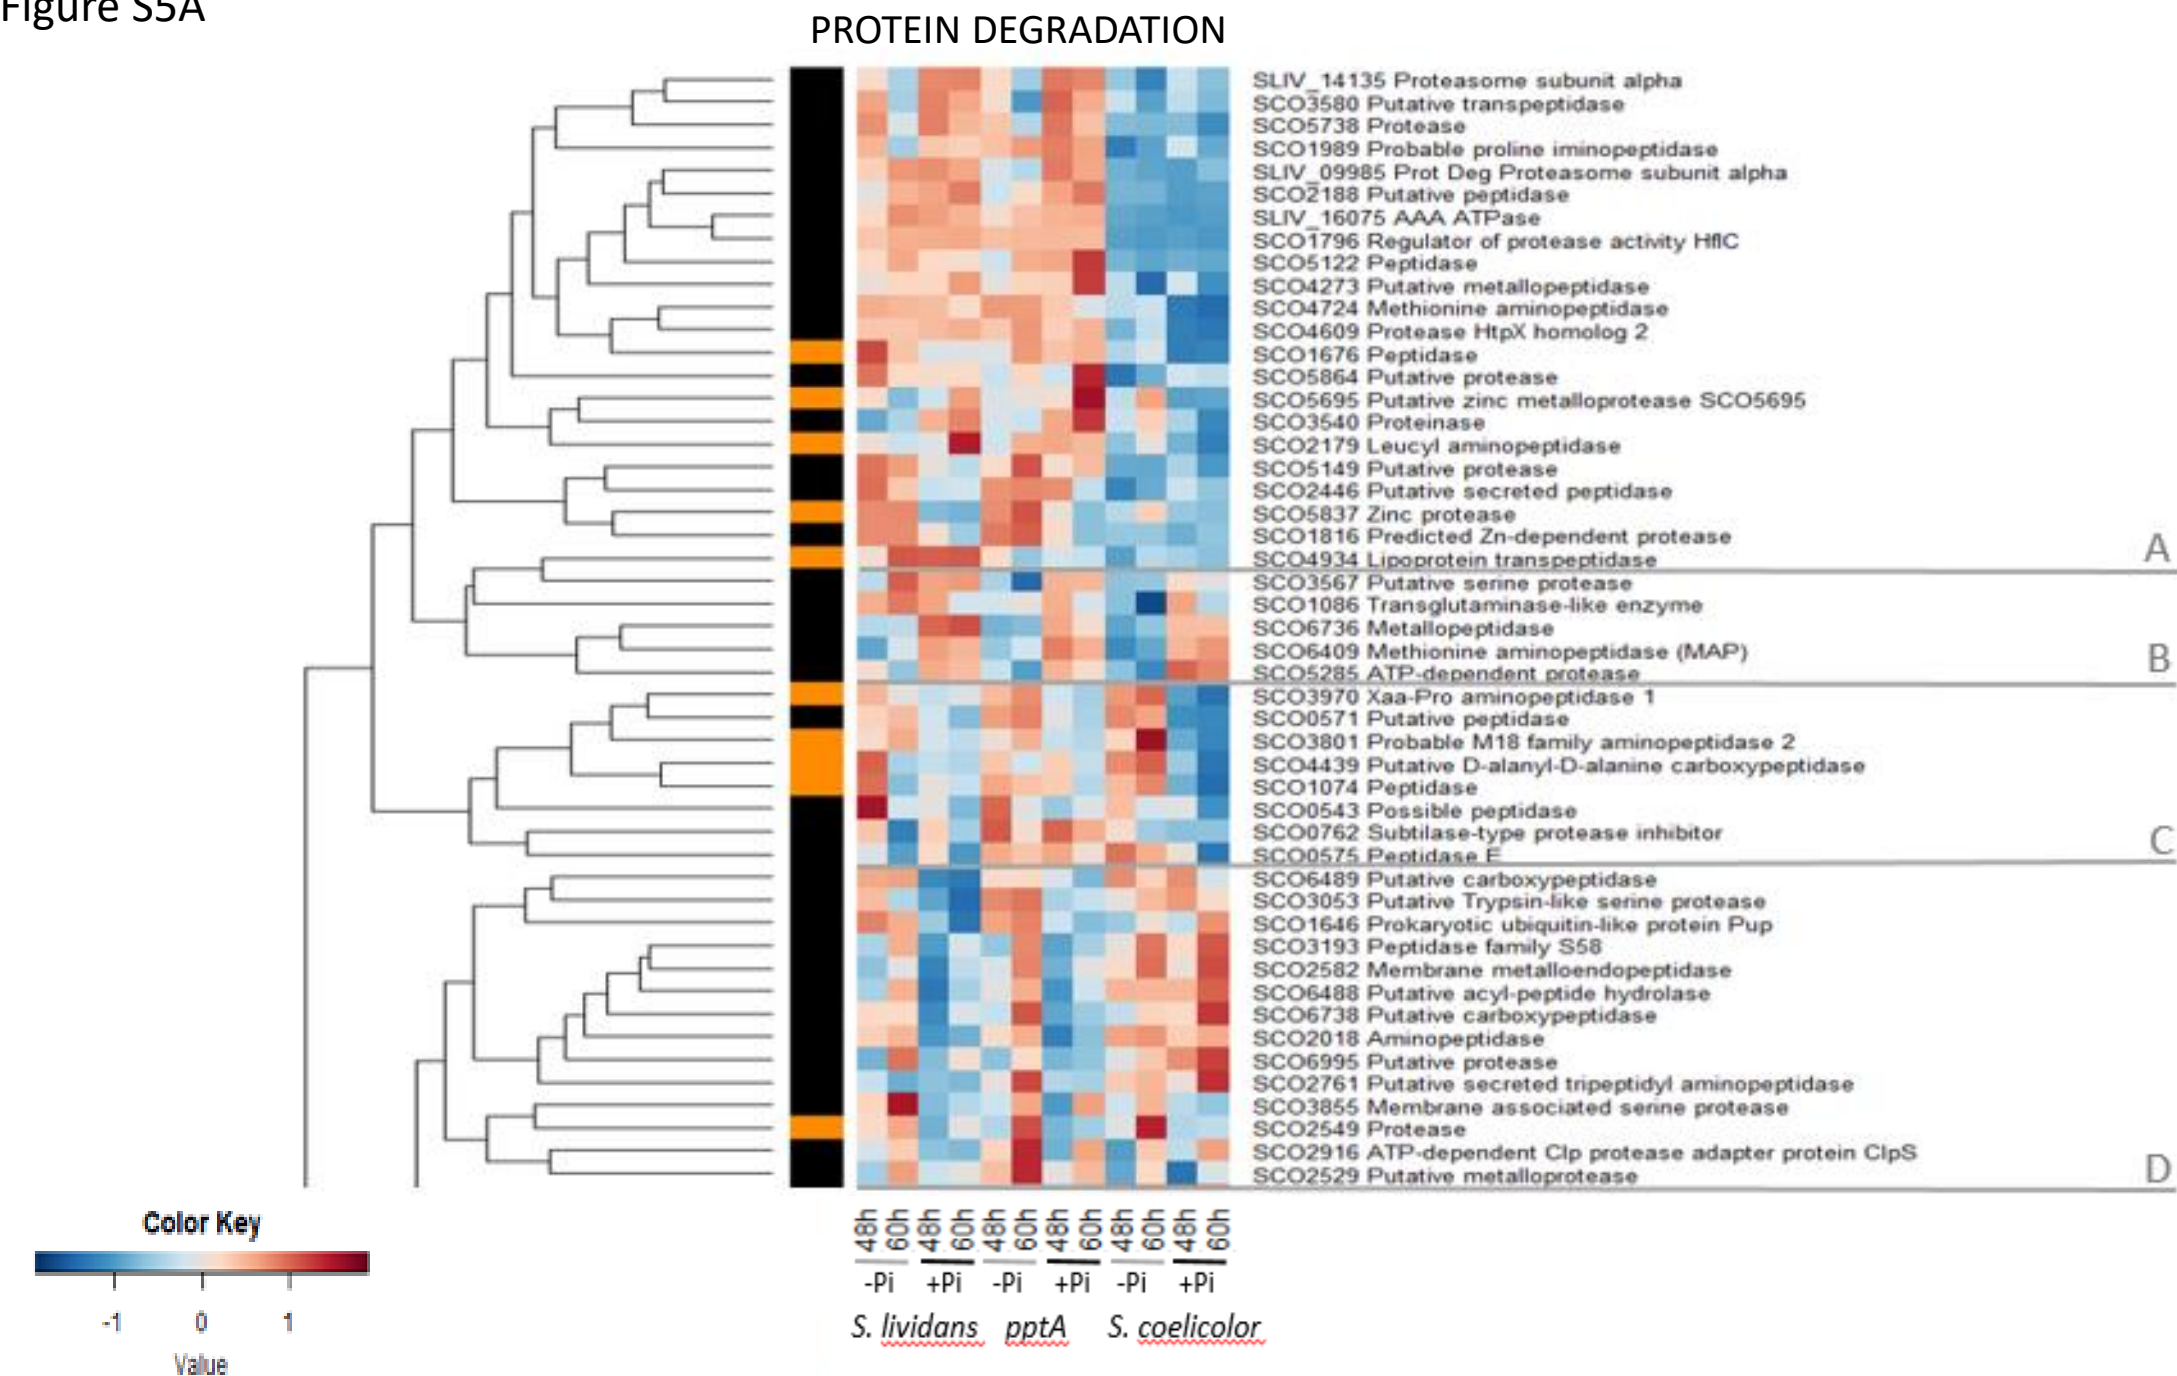

Figure S5B

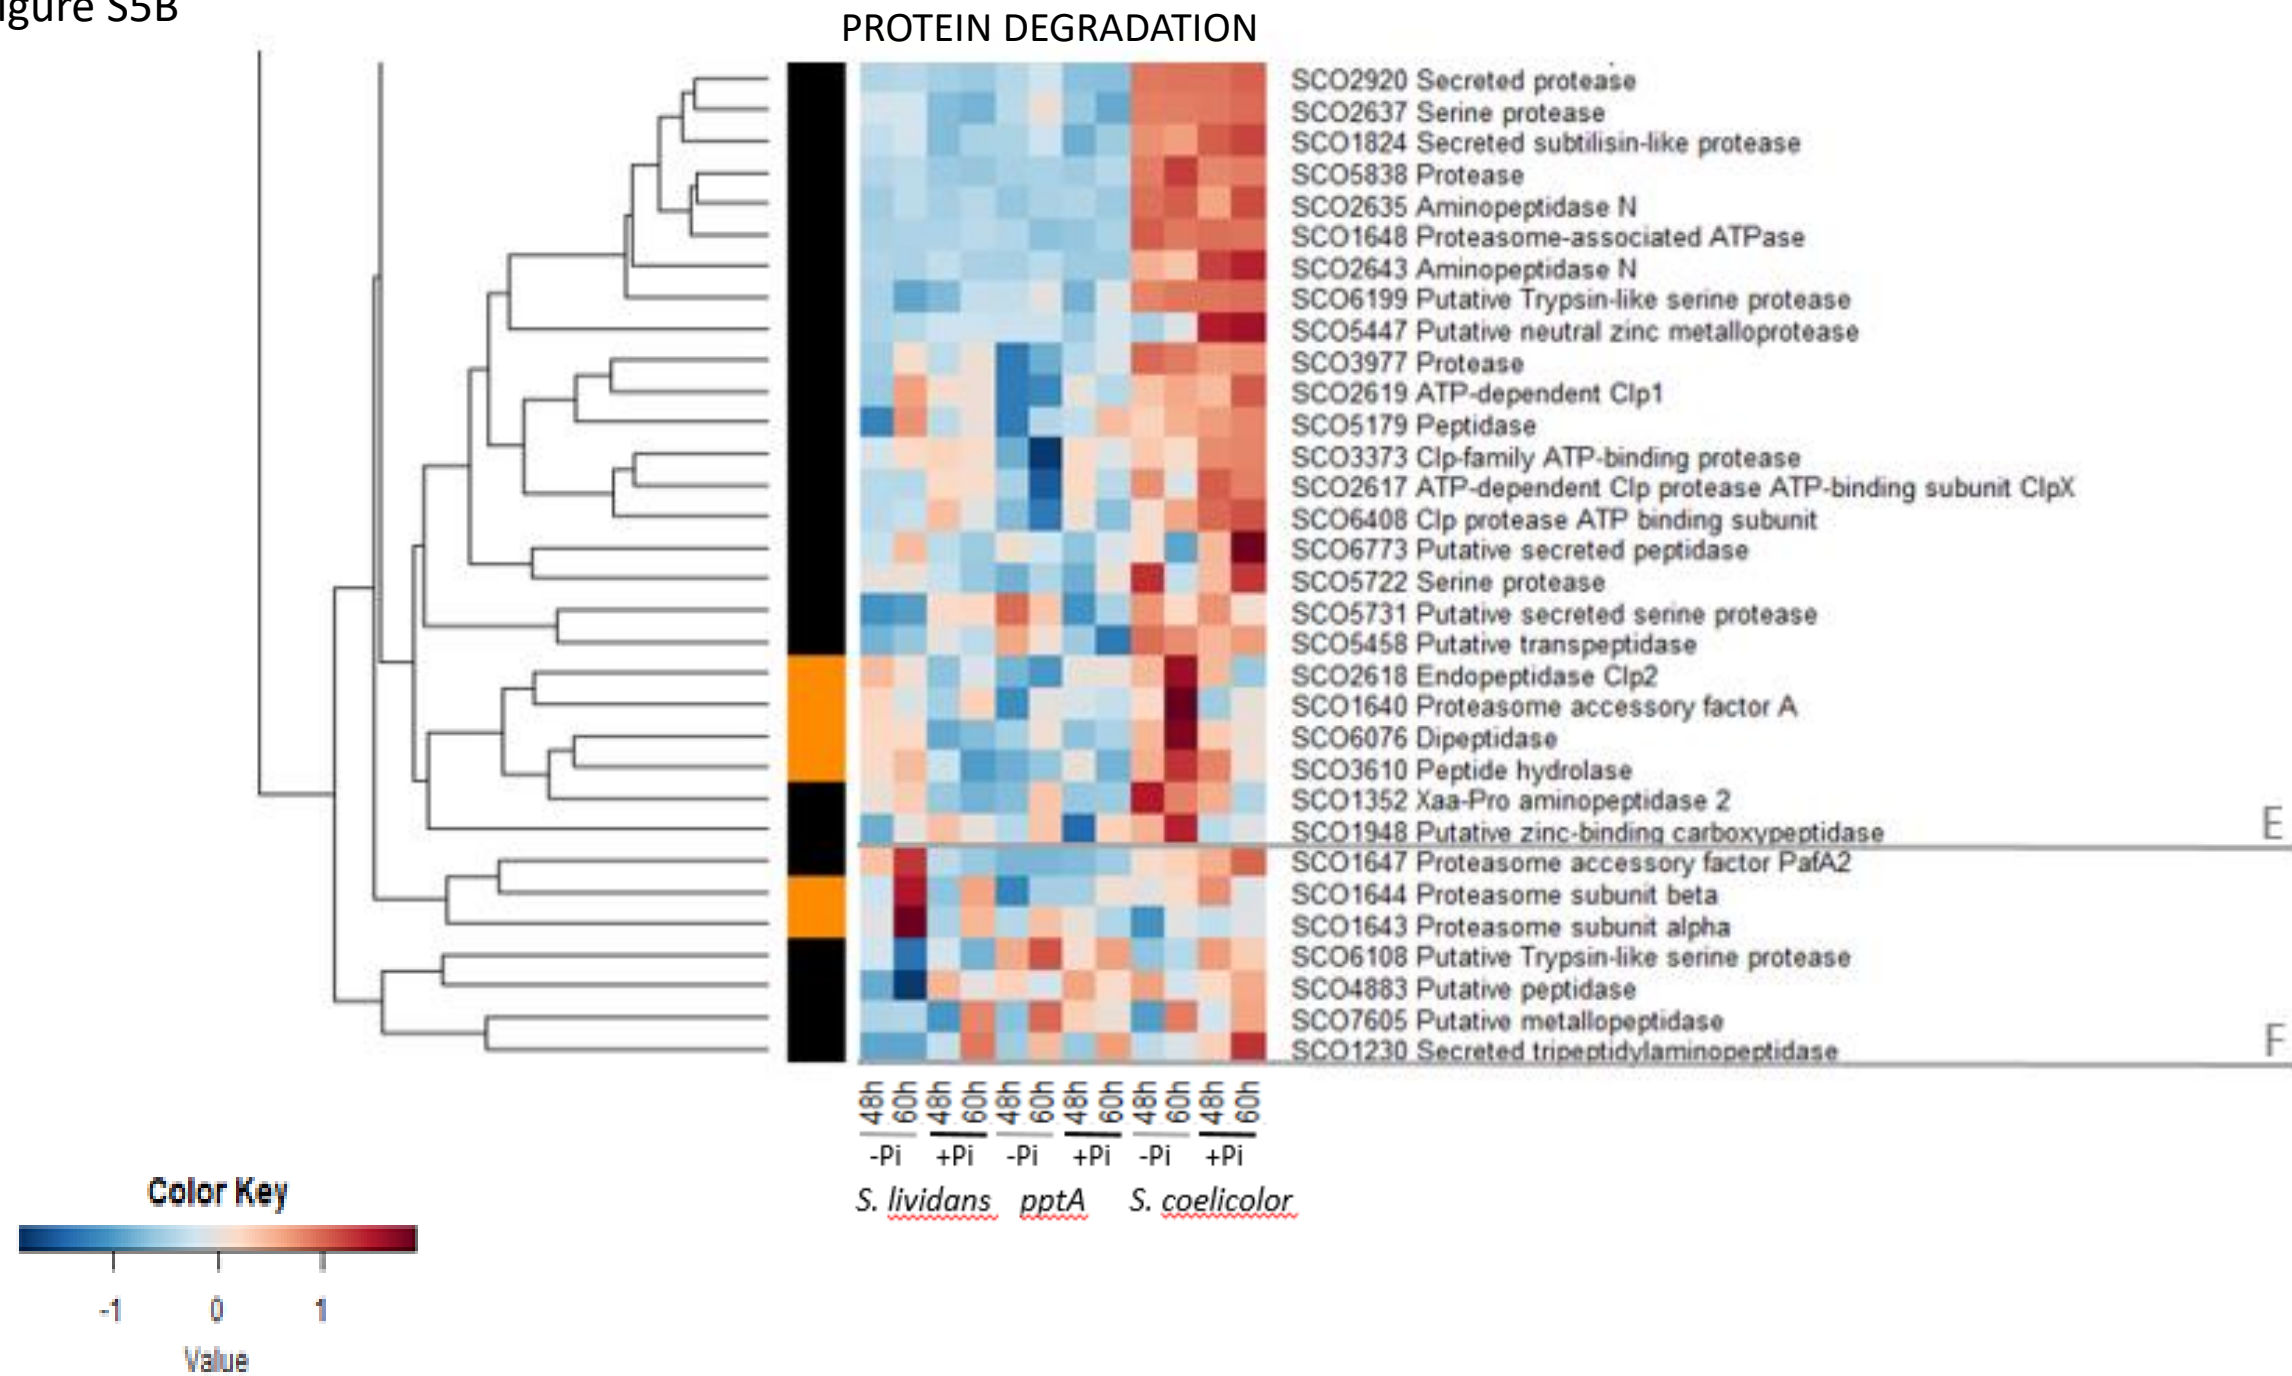

Figure S6

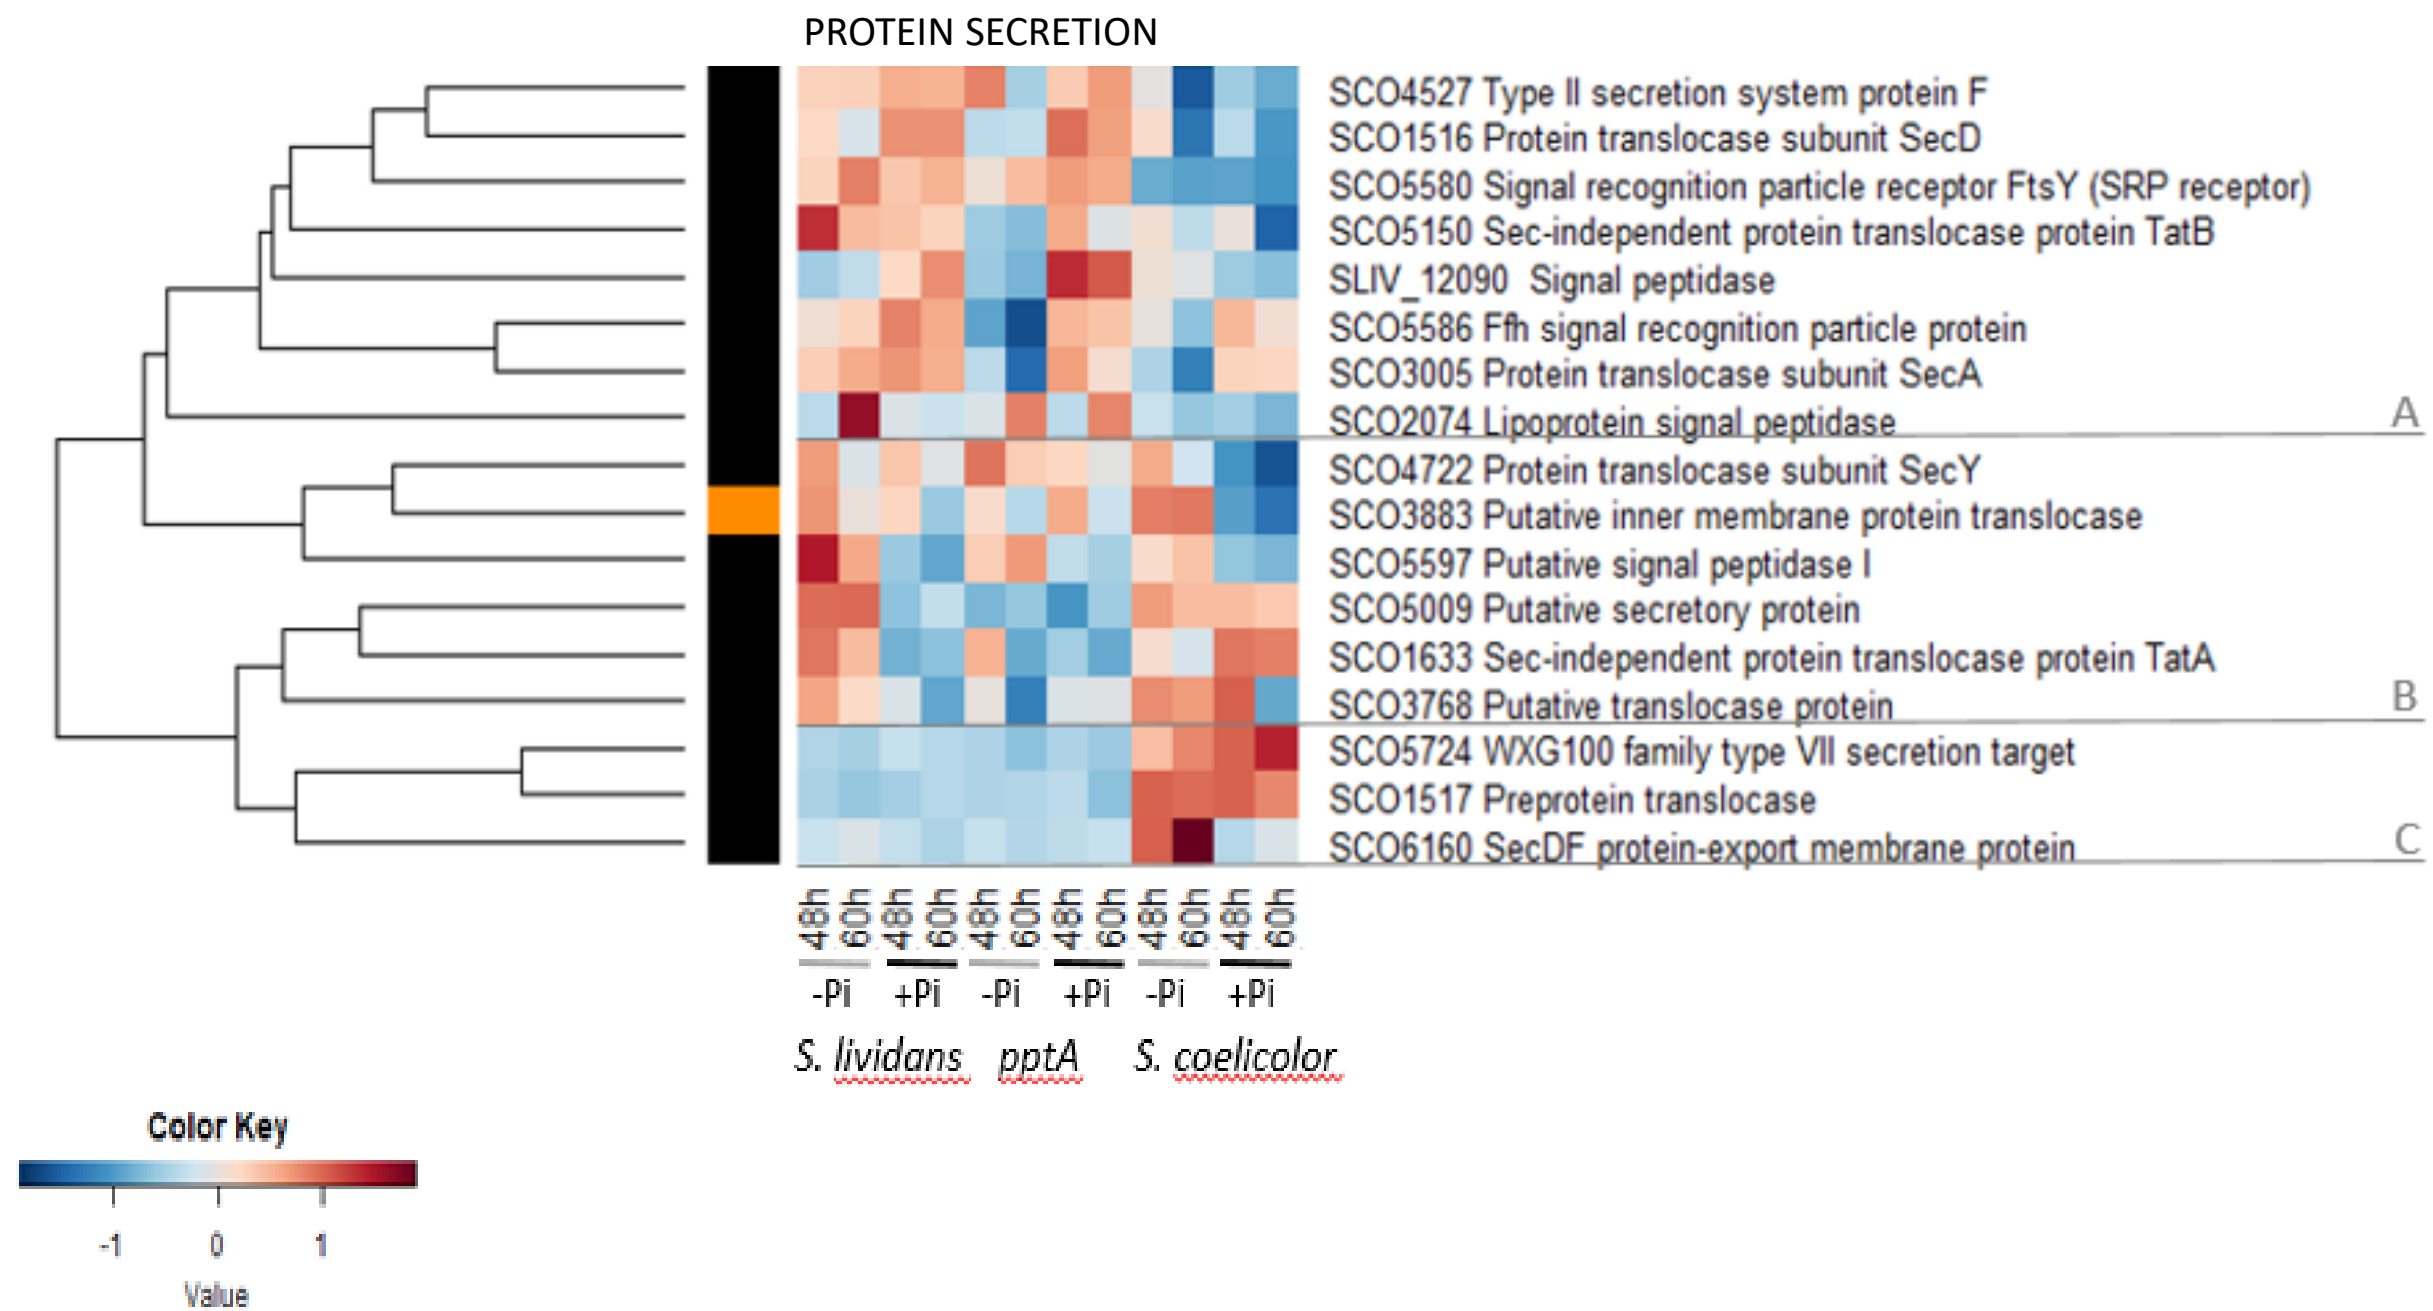

Figure S7A

NUCLEOTIDE BIOSYNTHESIS

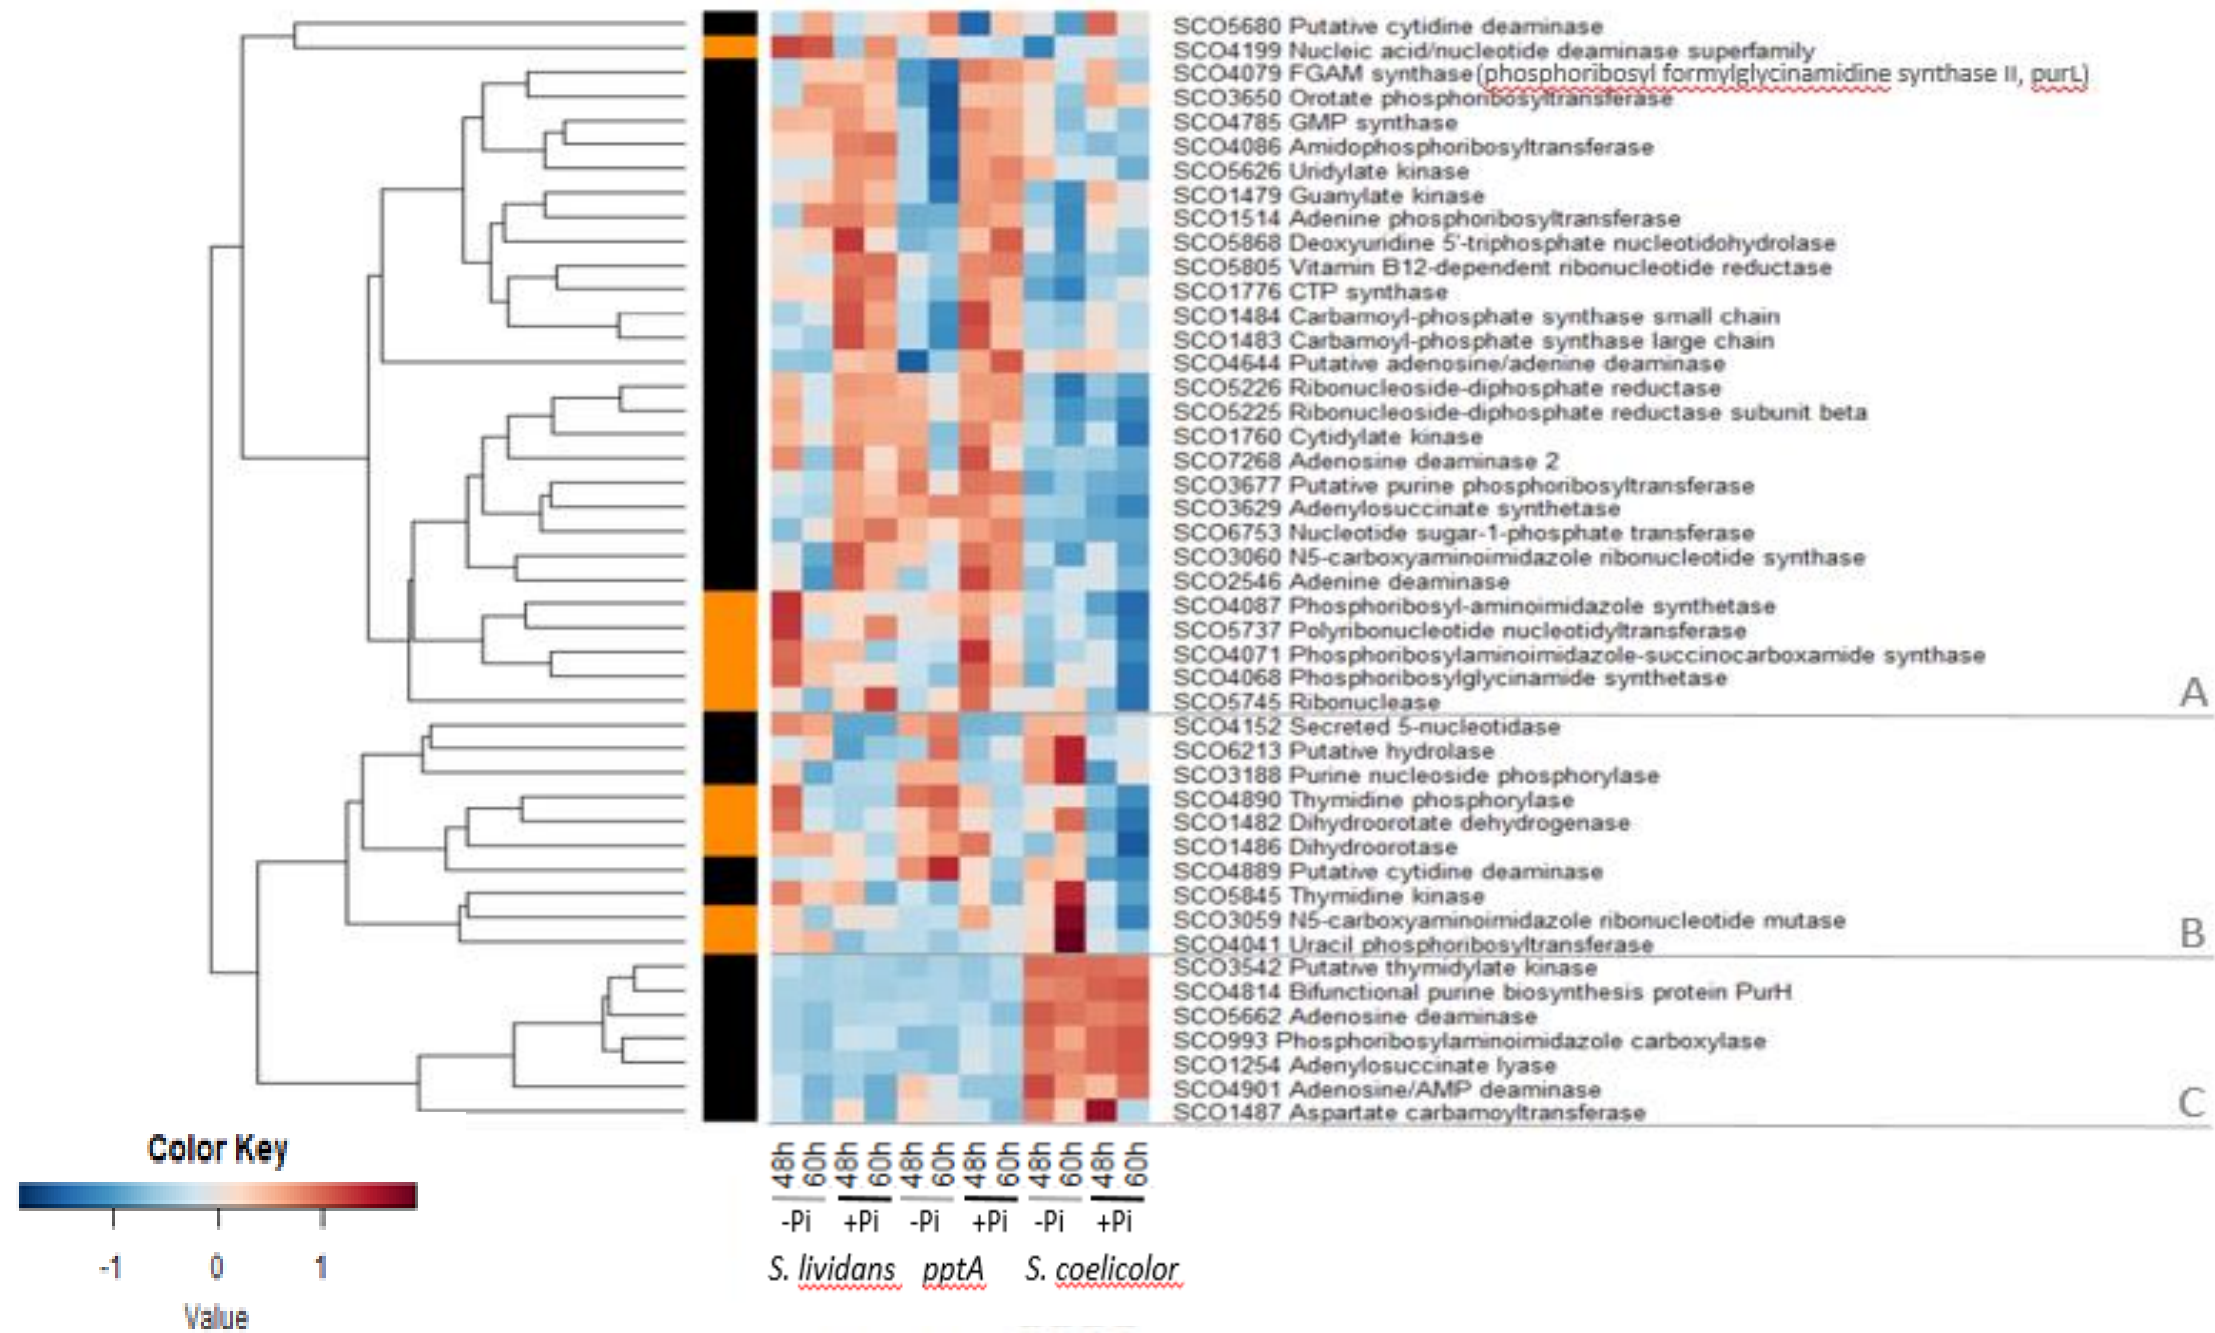

Figure S7B

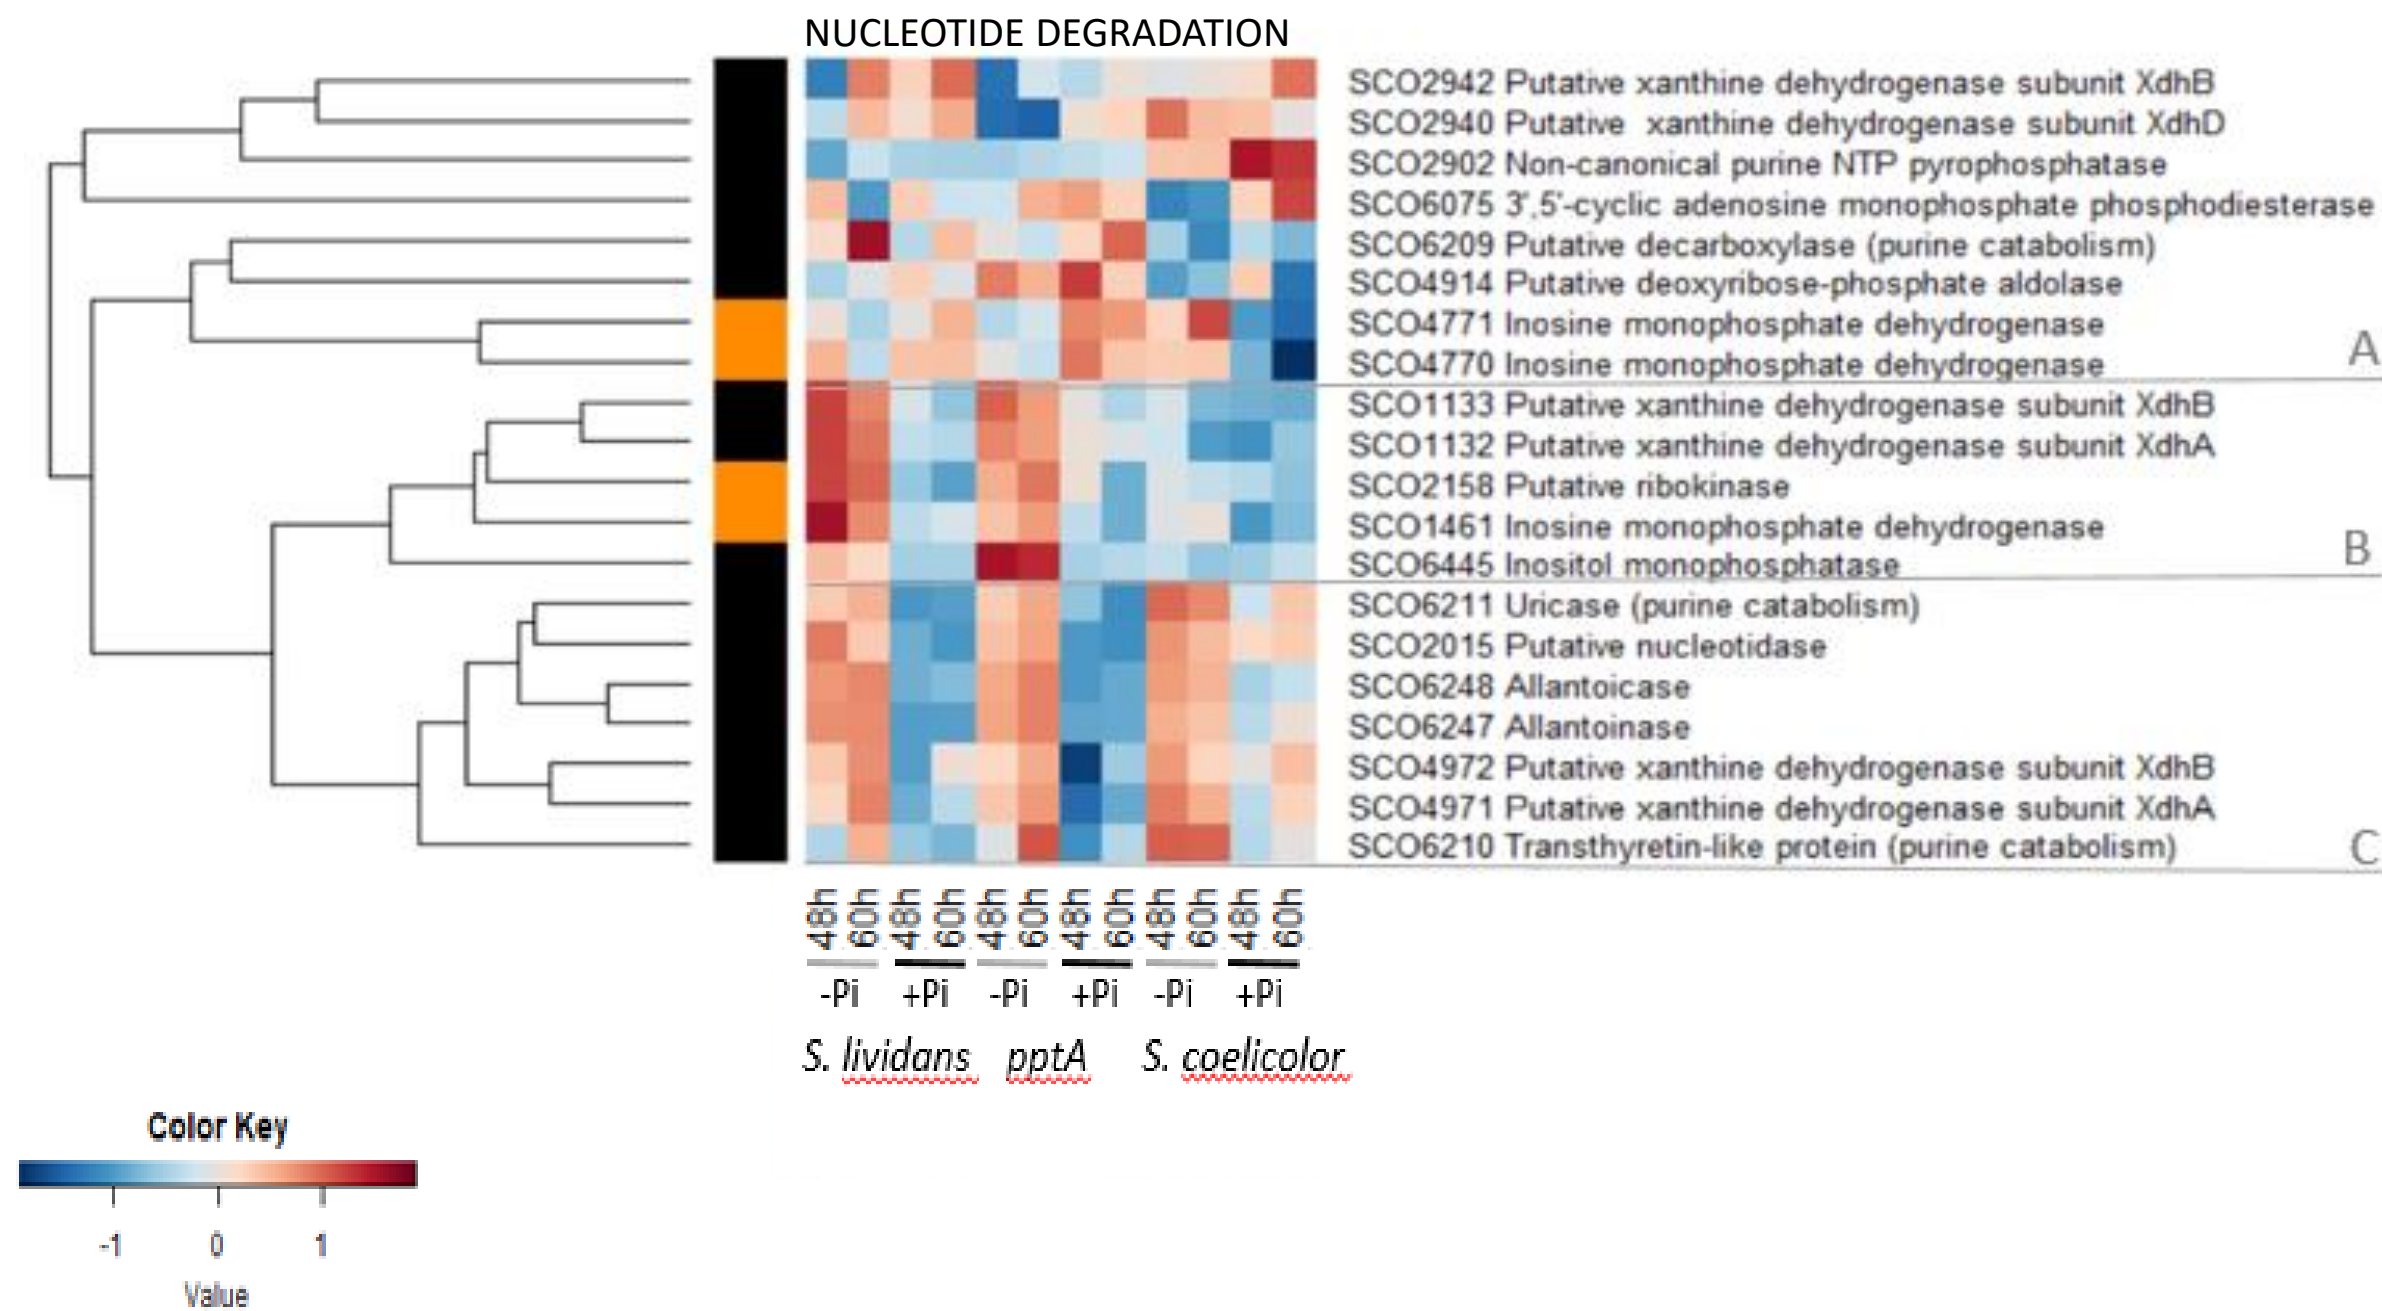

Figure S8

DNA REPLICATION AND REPAIR

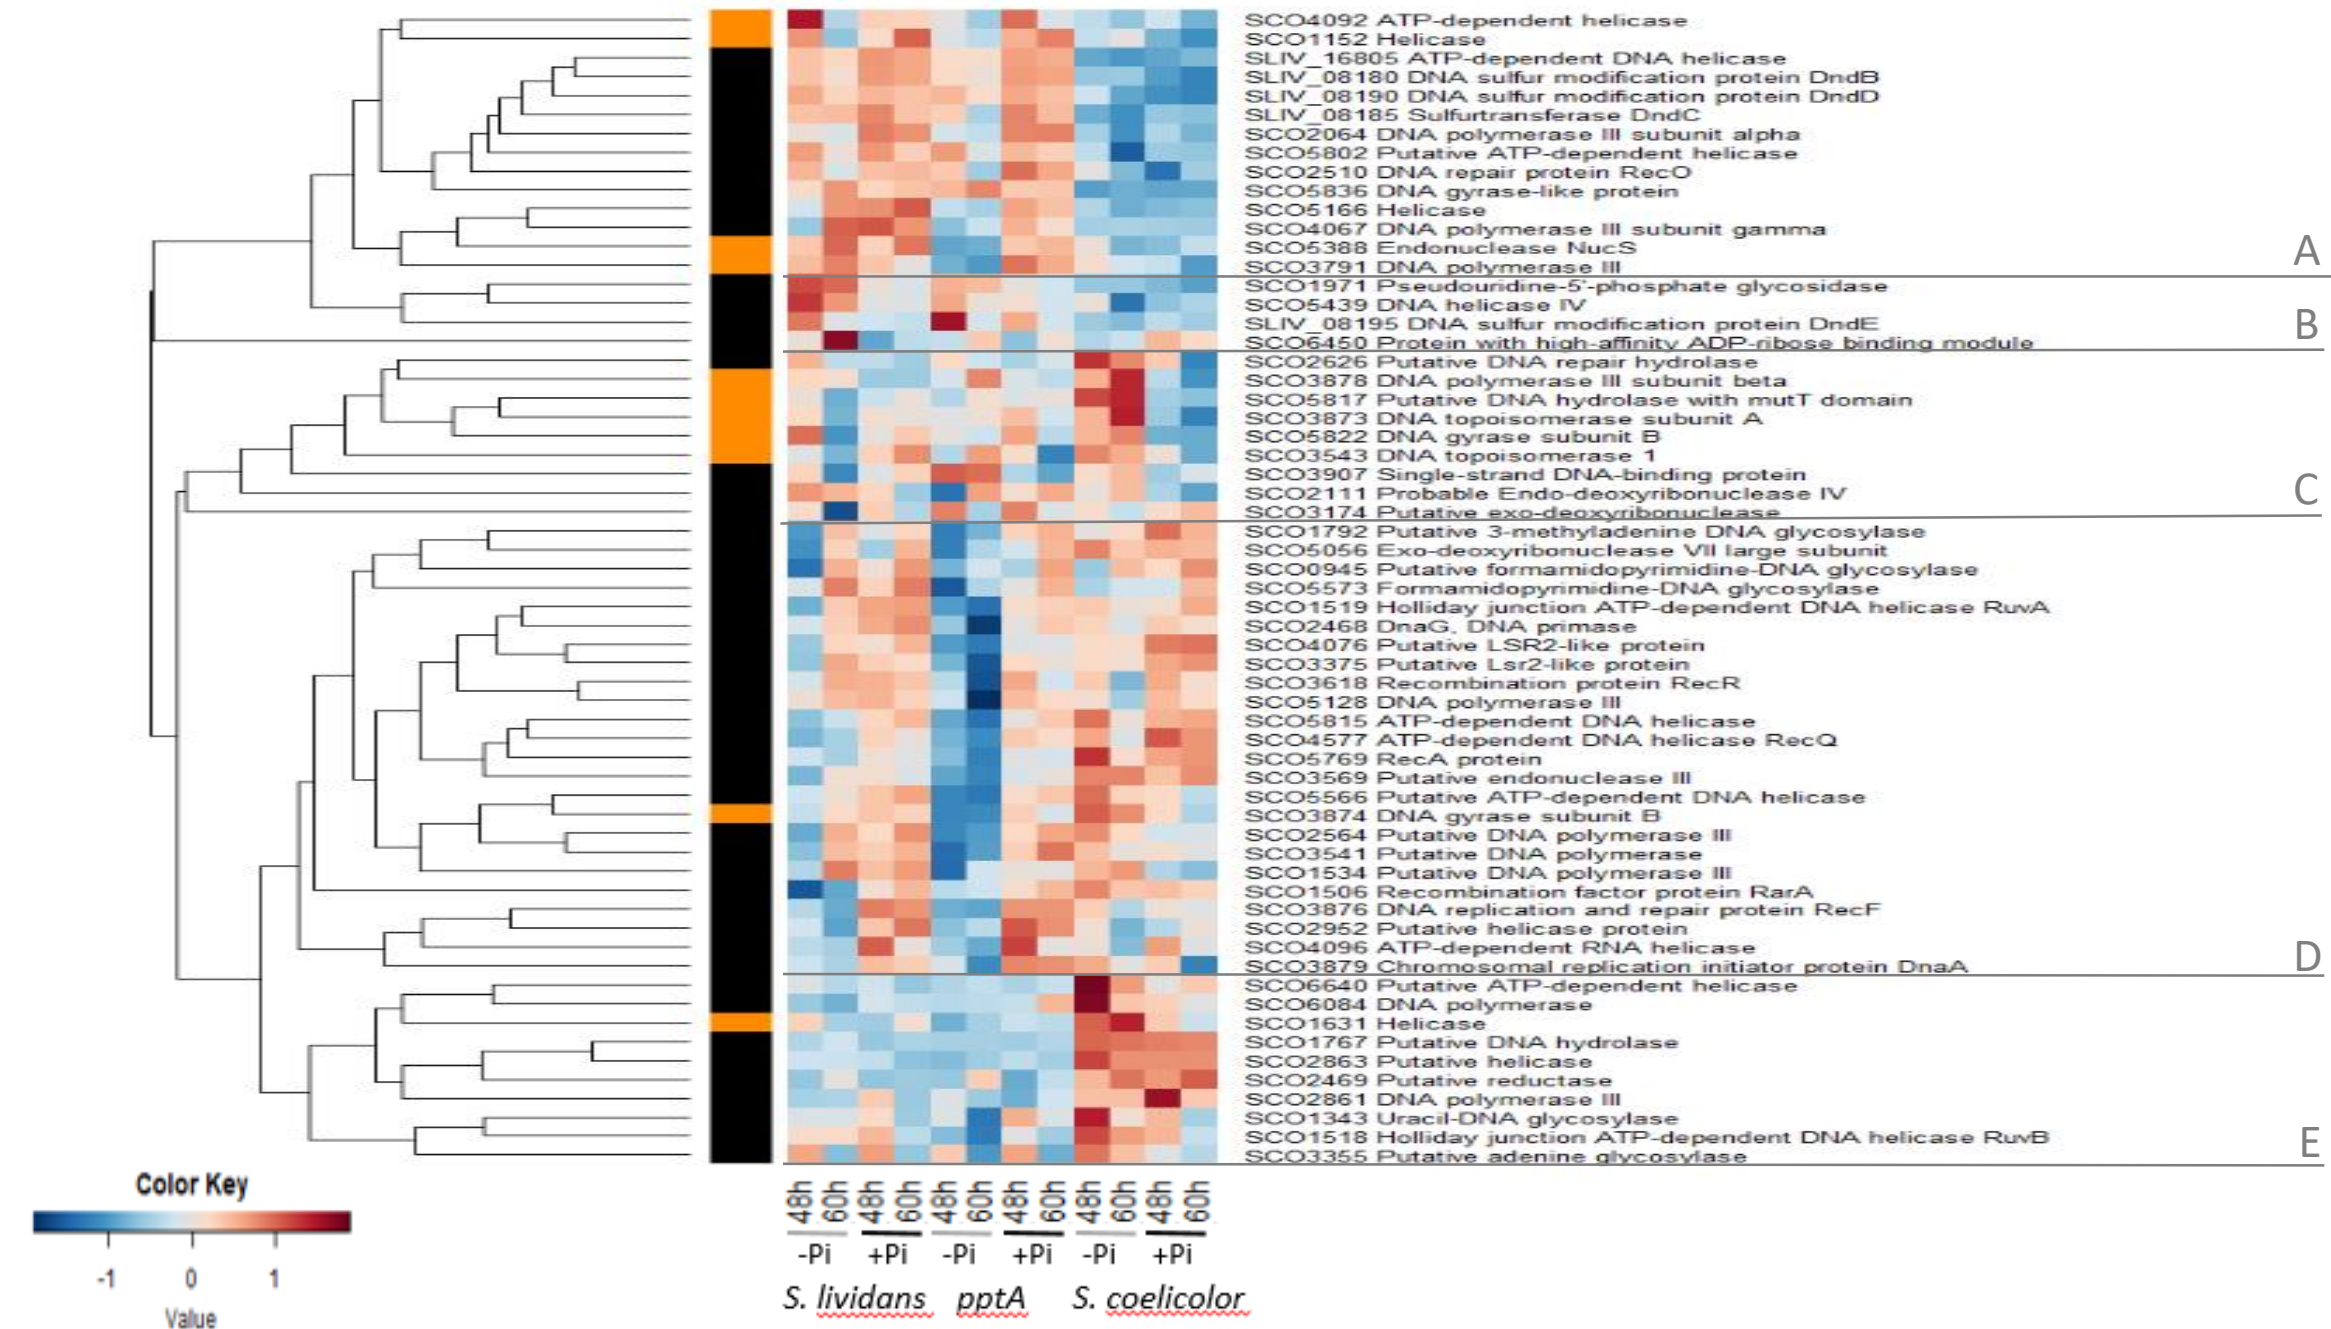

Figure S9

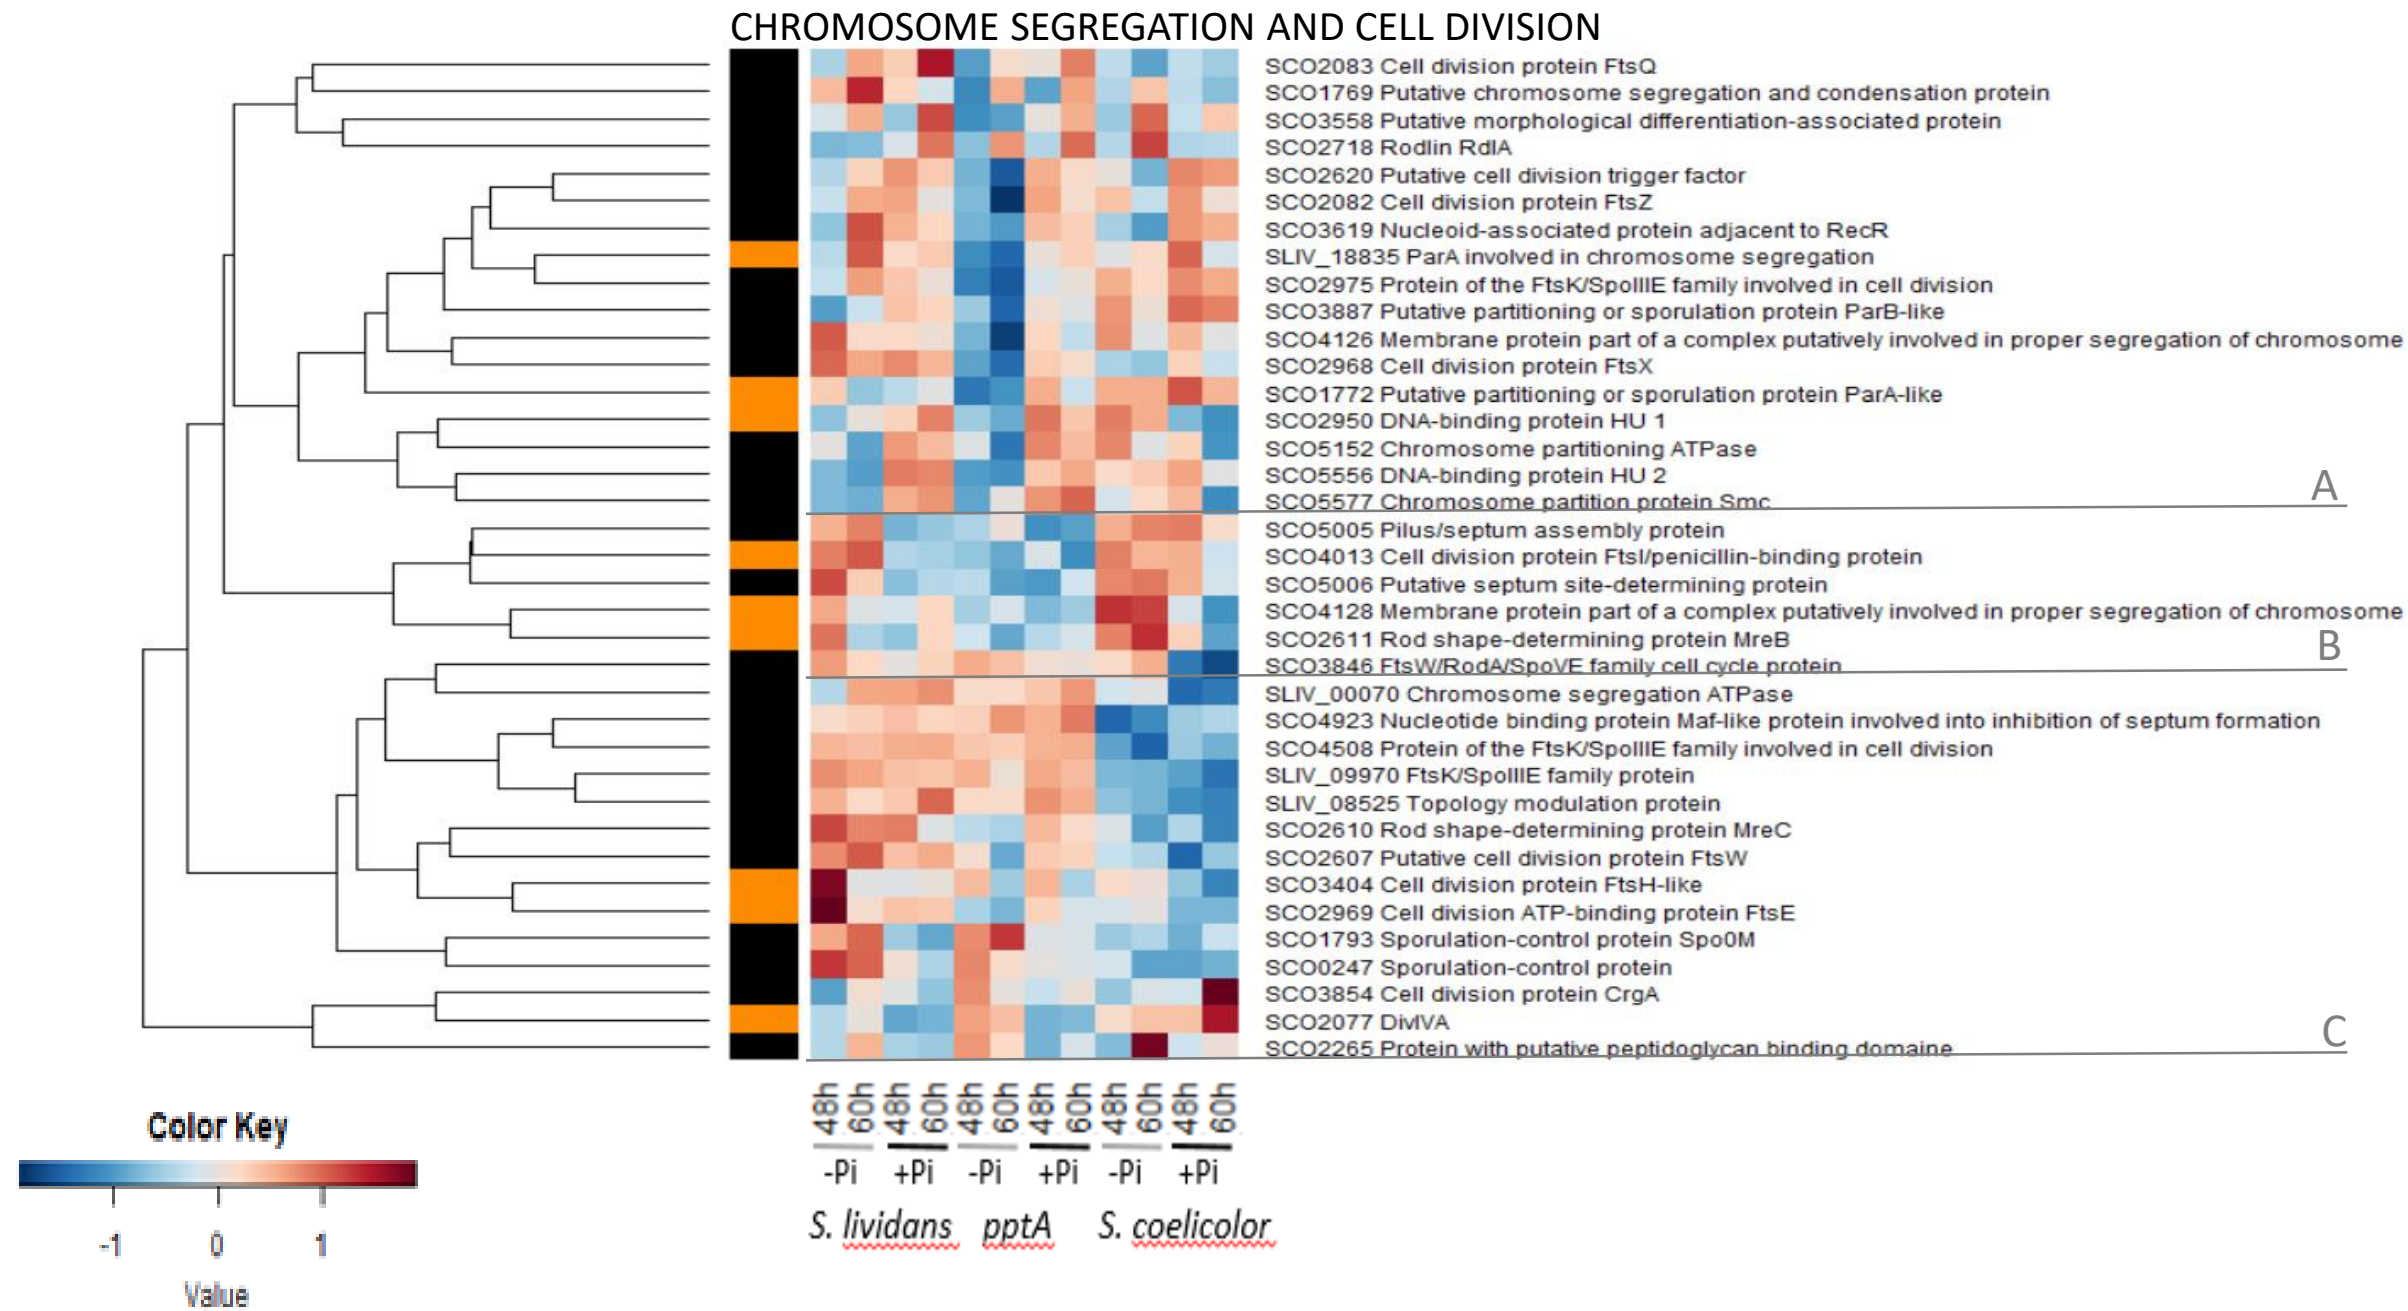

Figure S10

CELL WALL BIOSYNTHESIS AND DEGRADATION

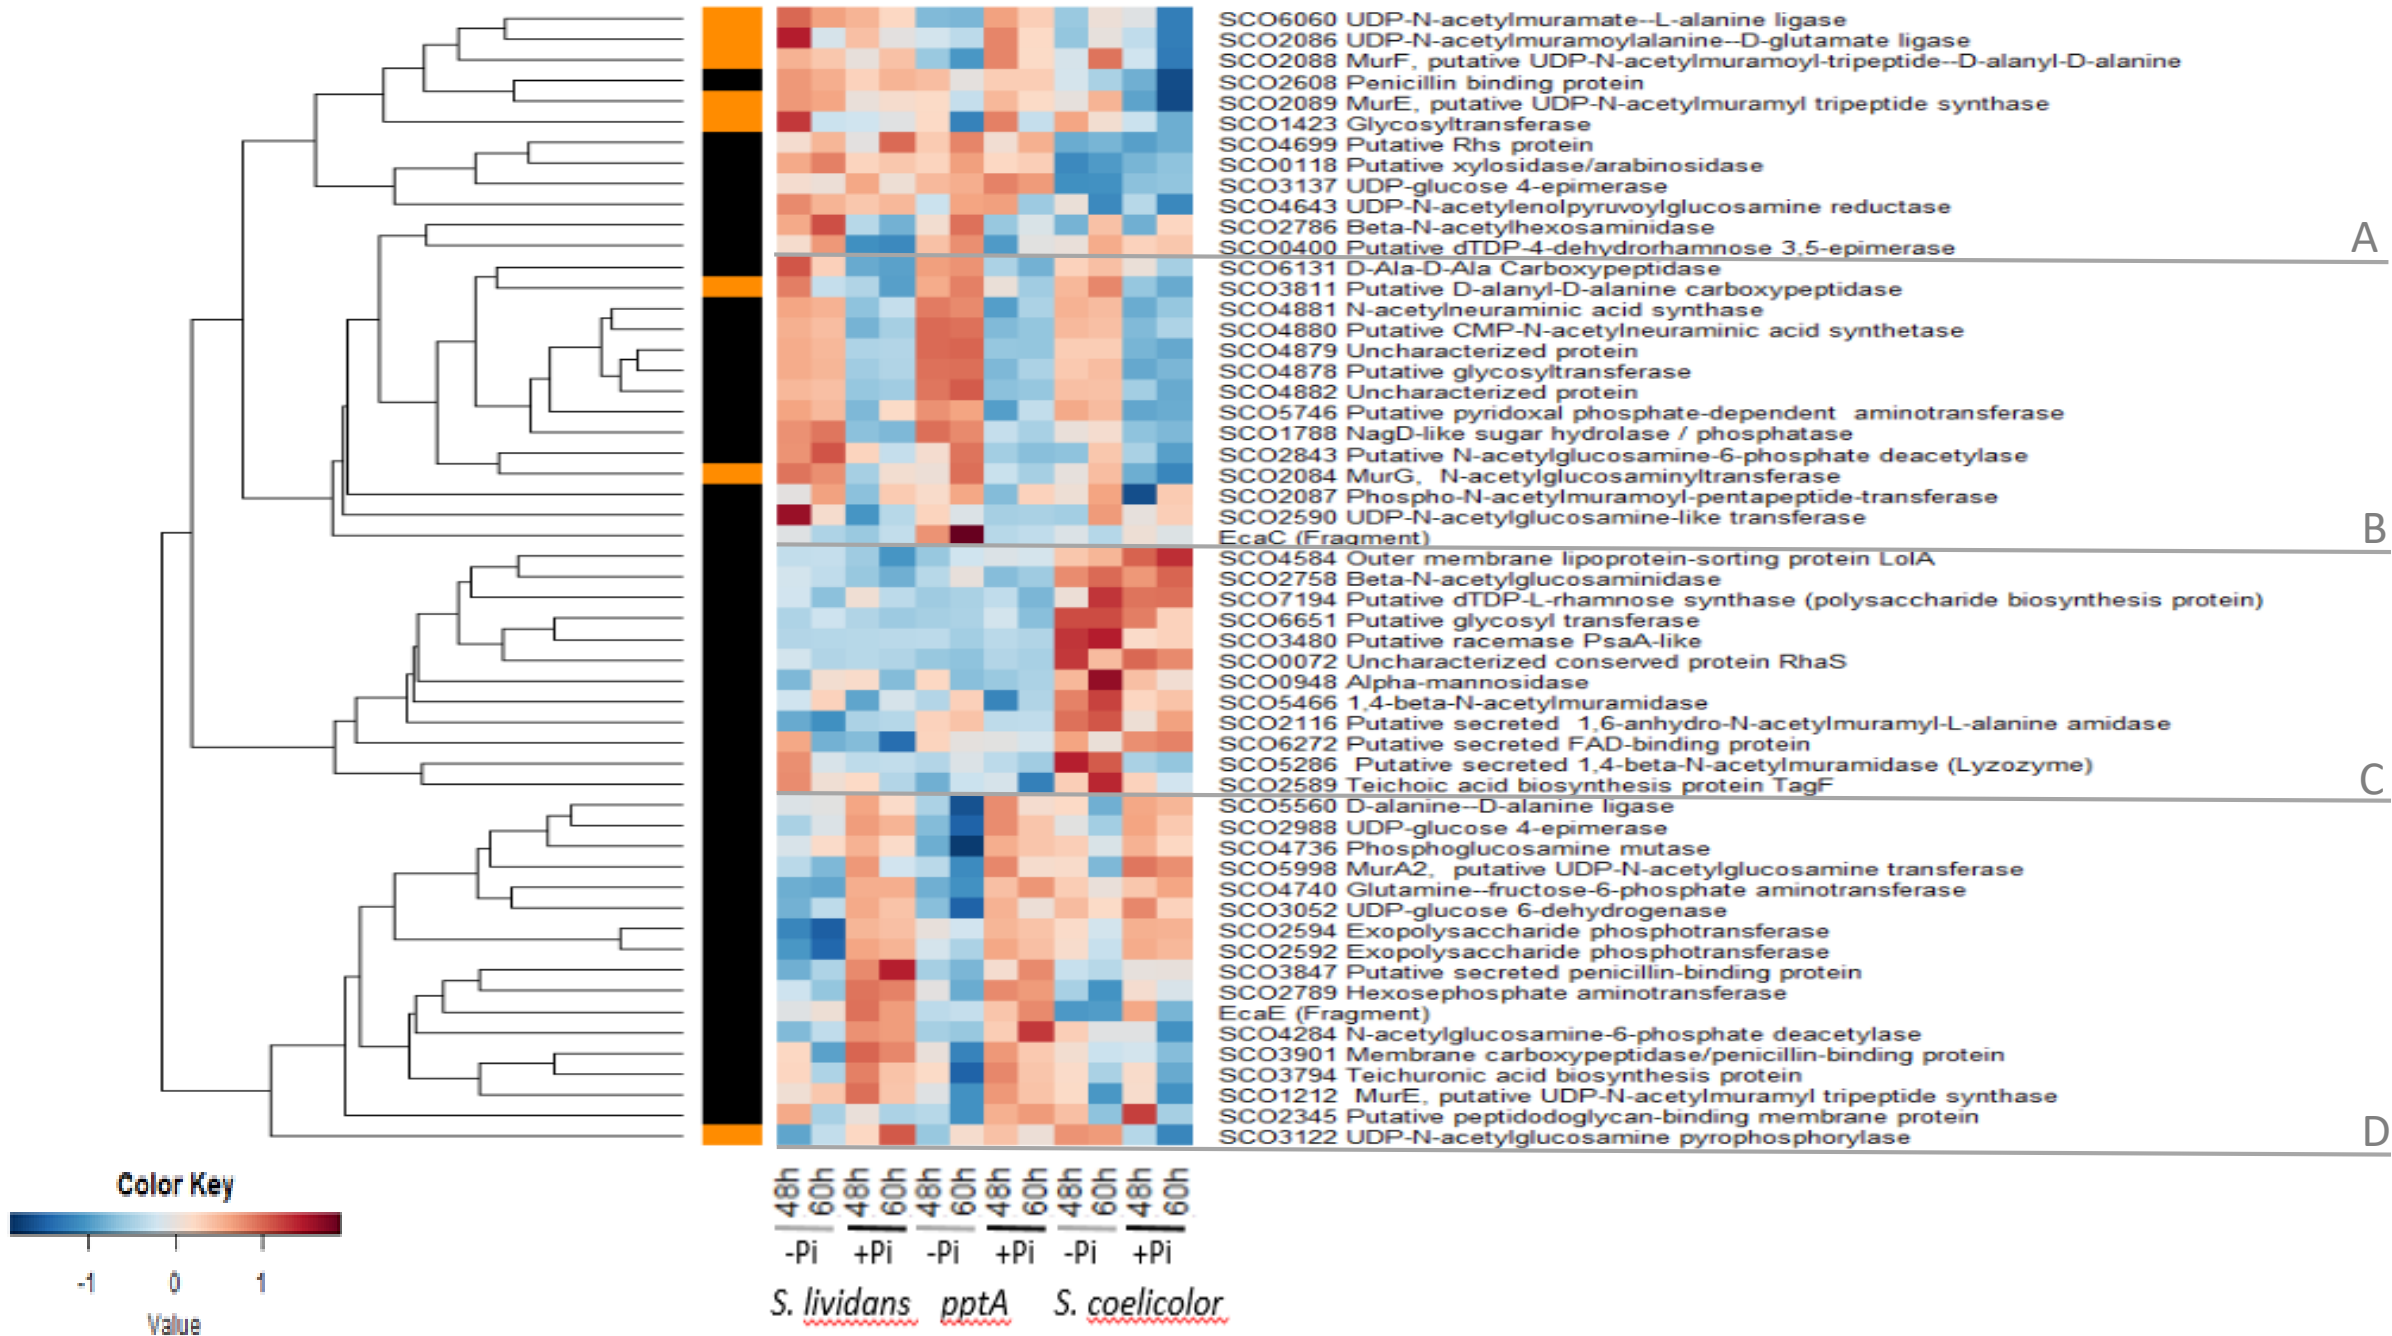

Figure S11A

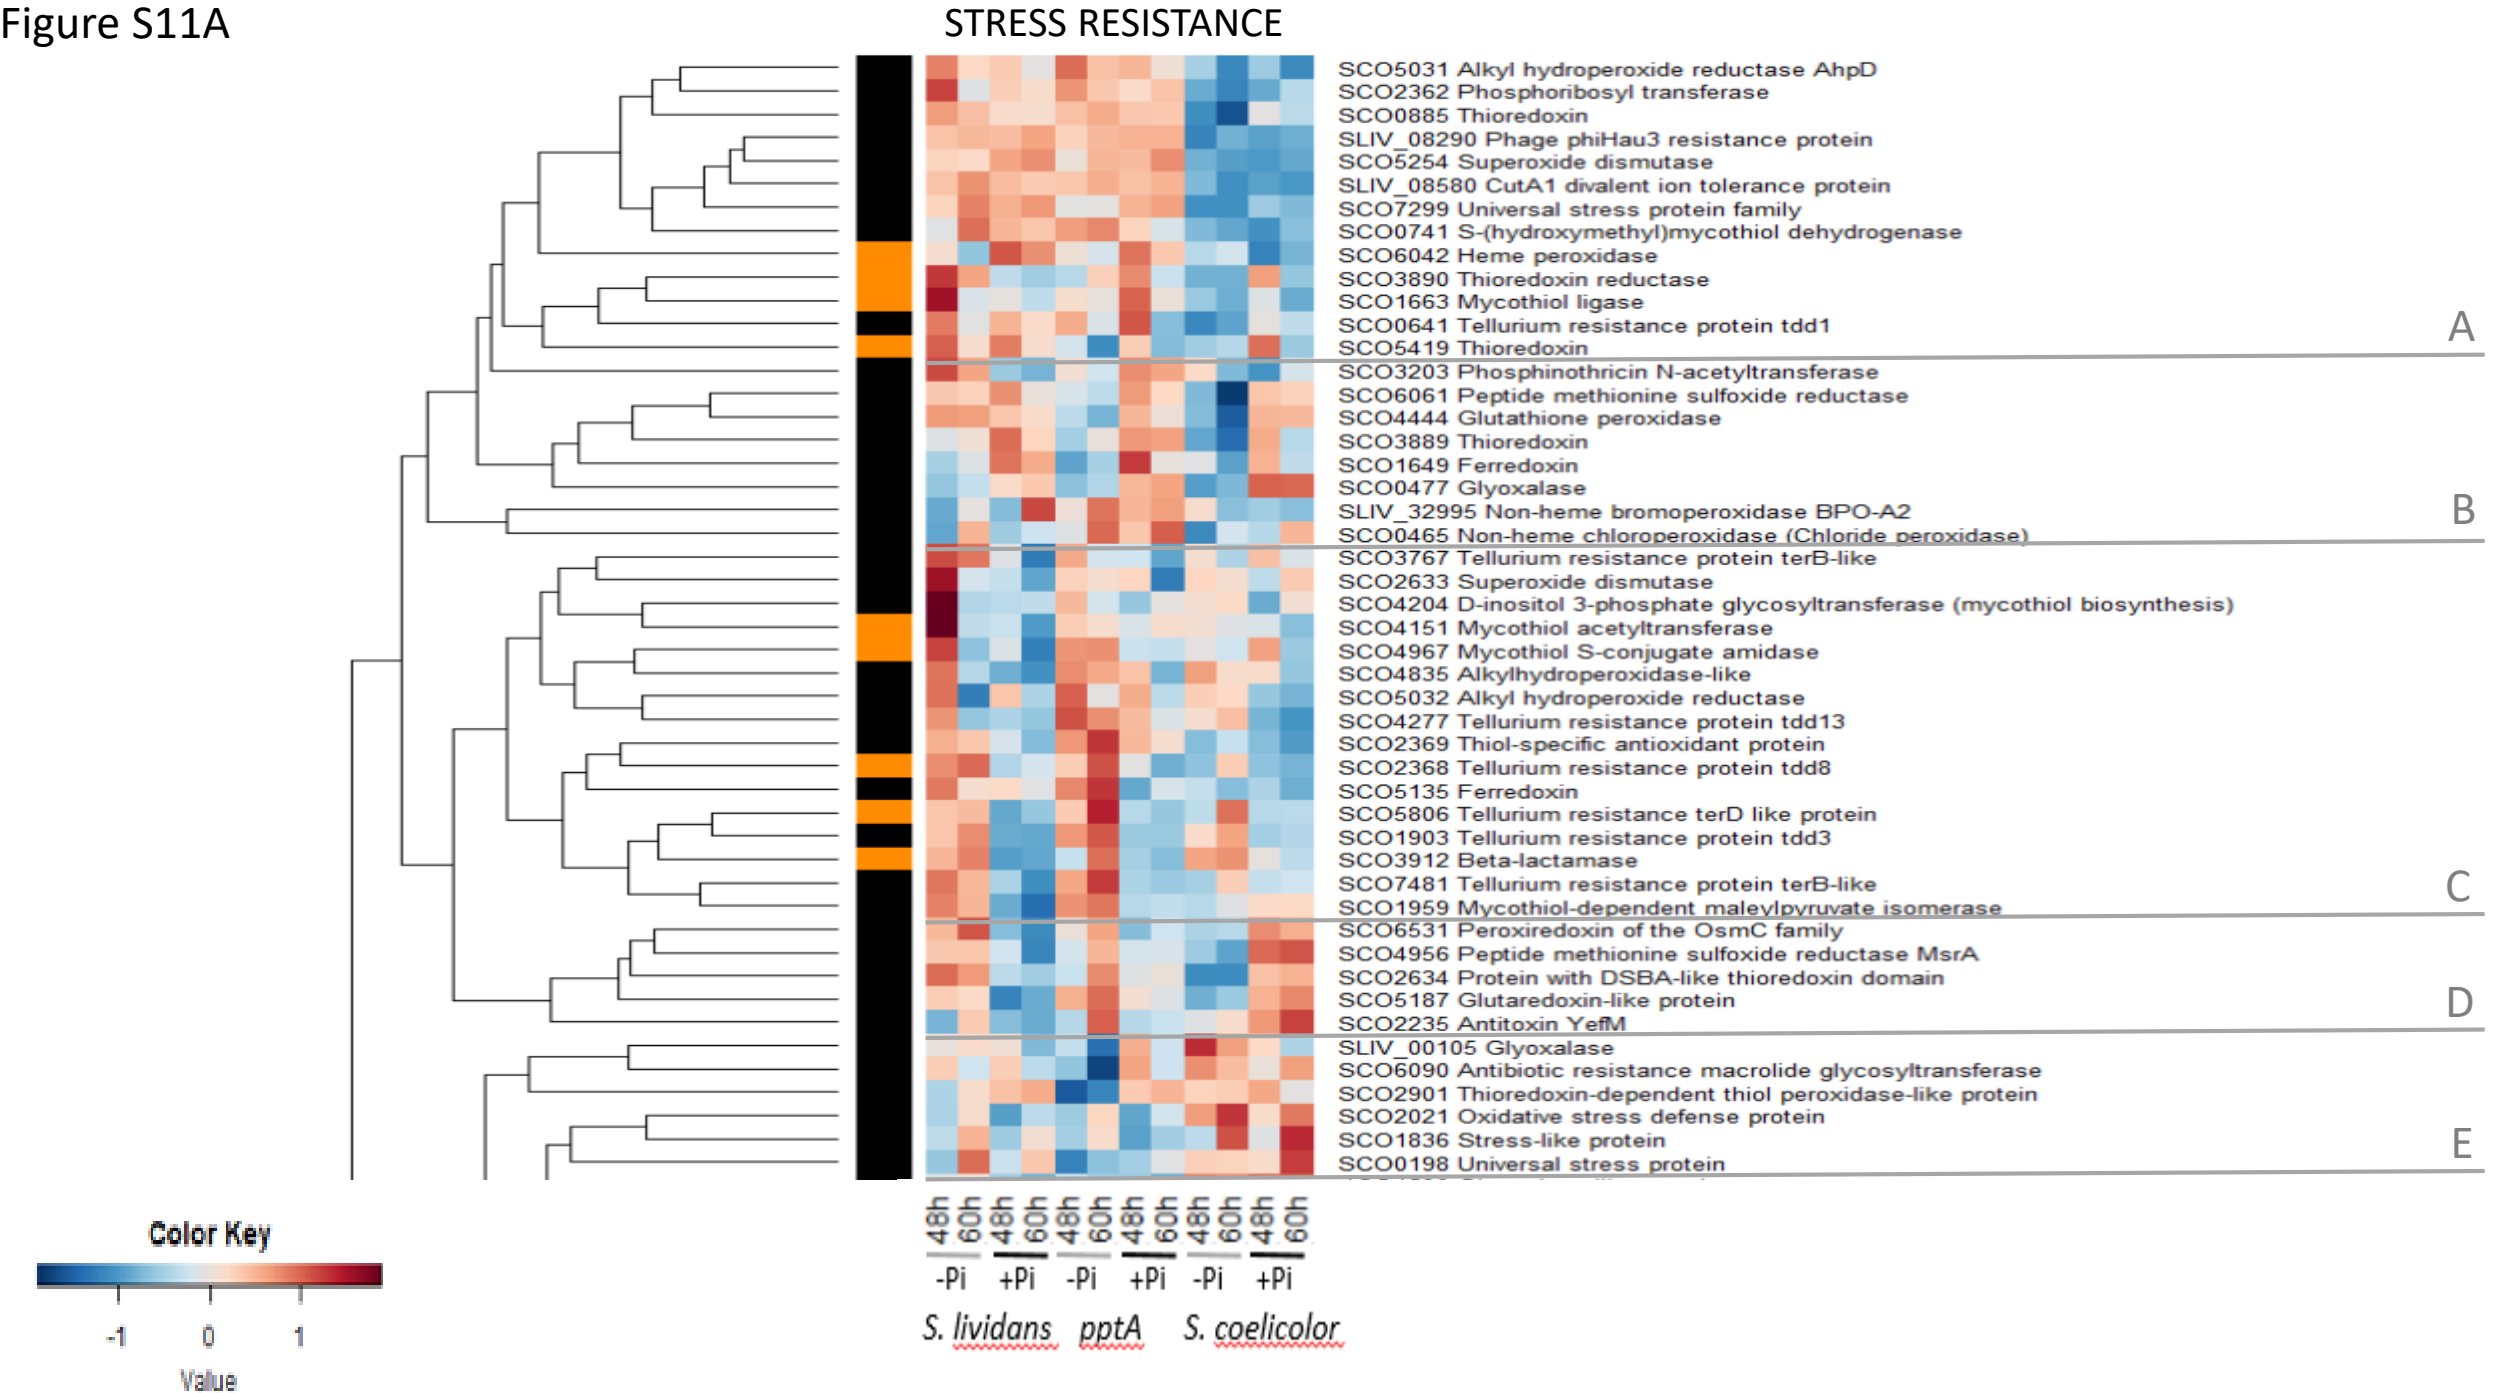

Figure S11B

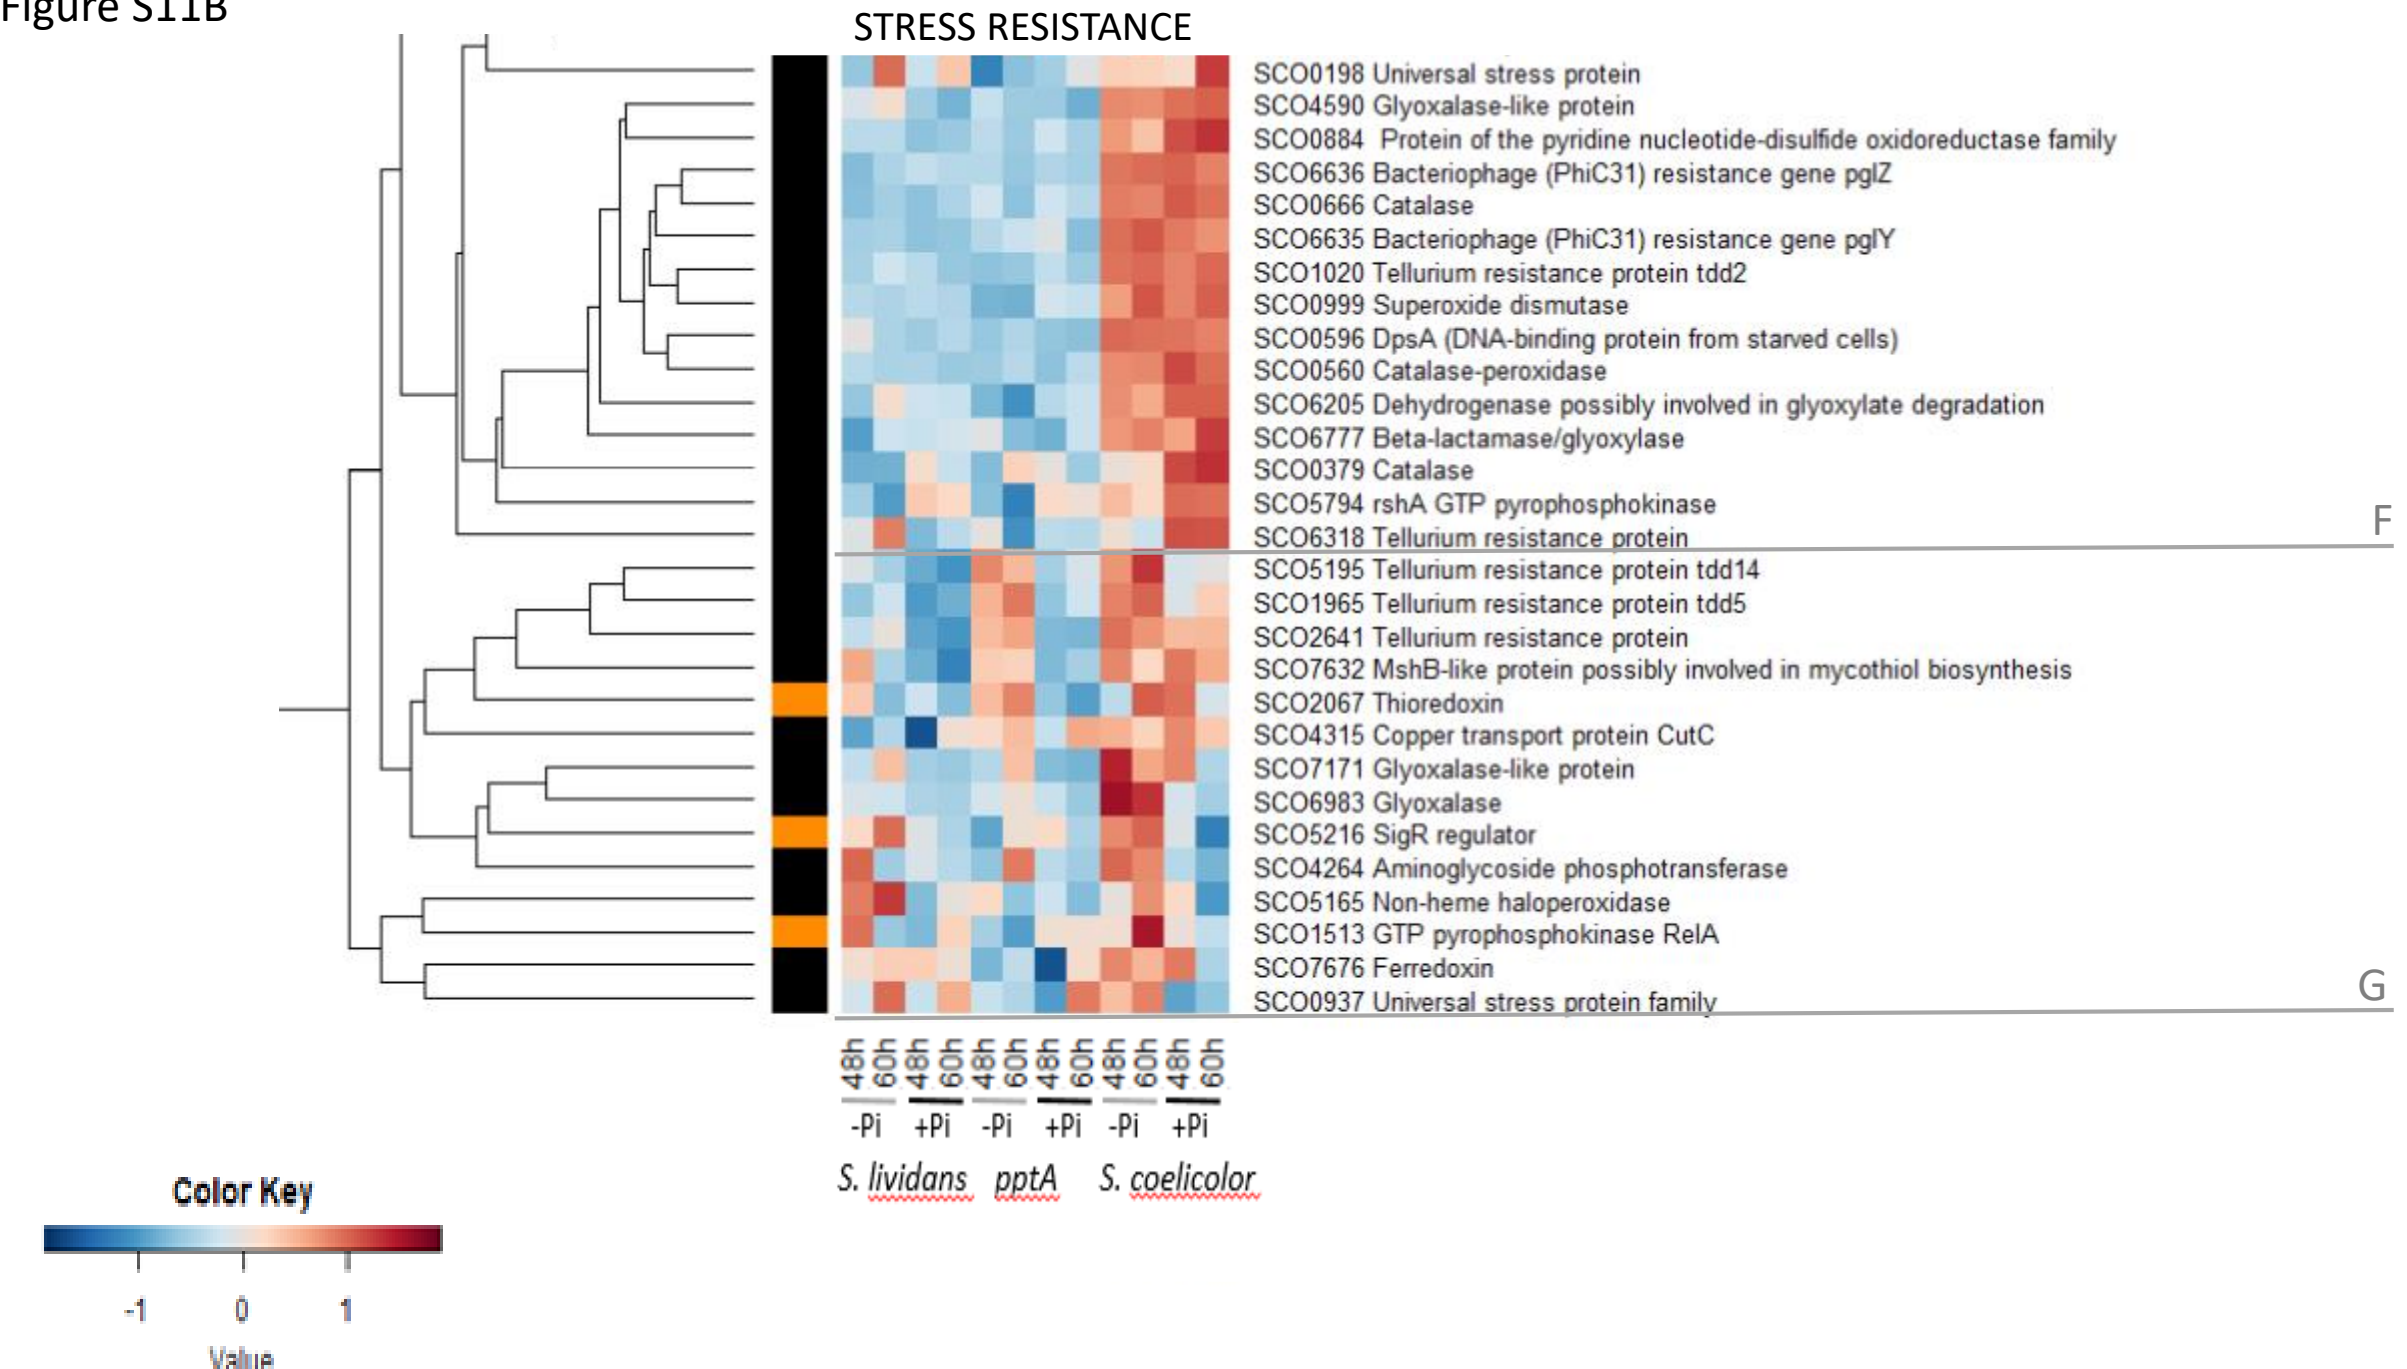

Figure S11C

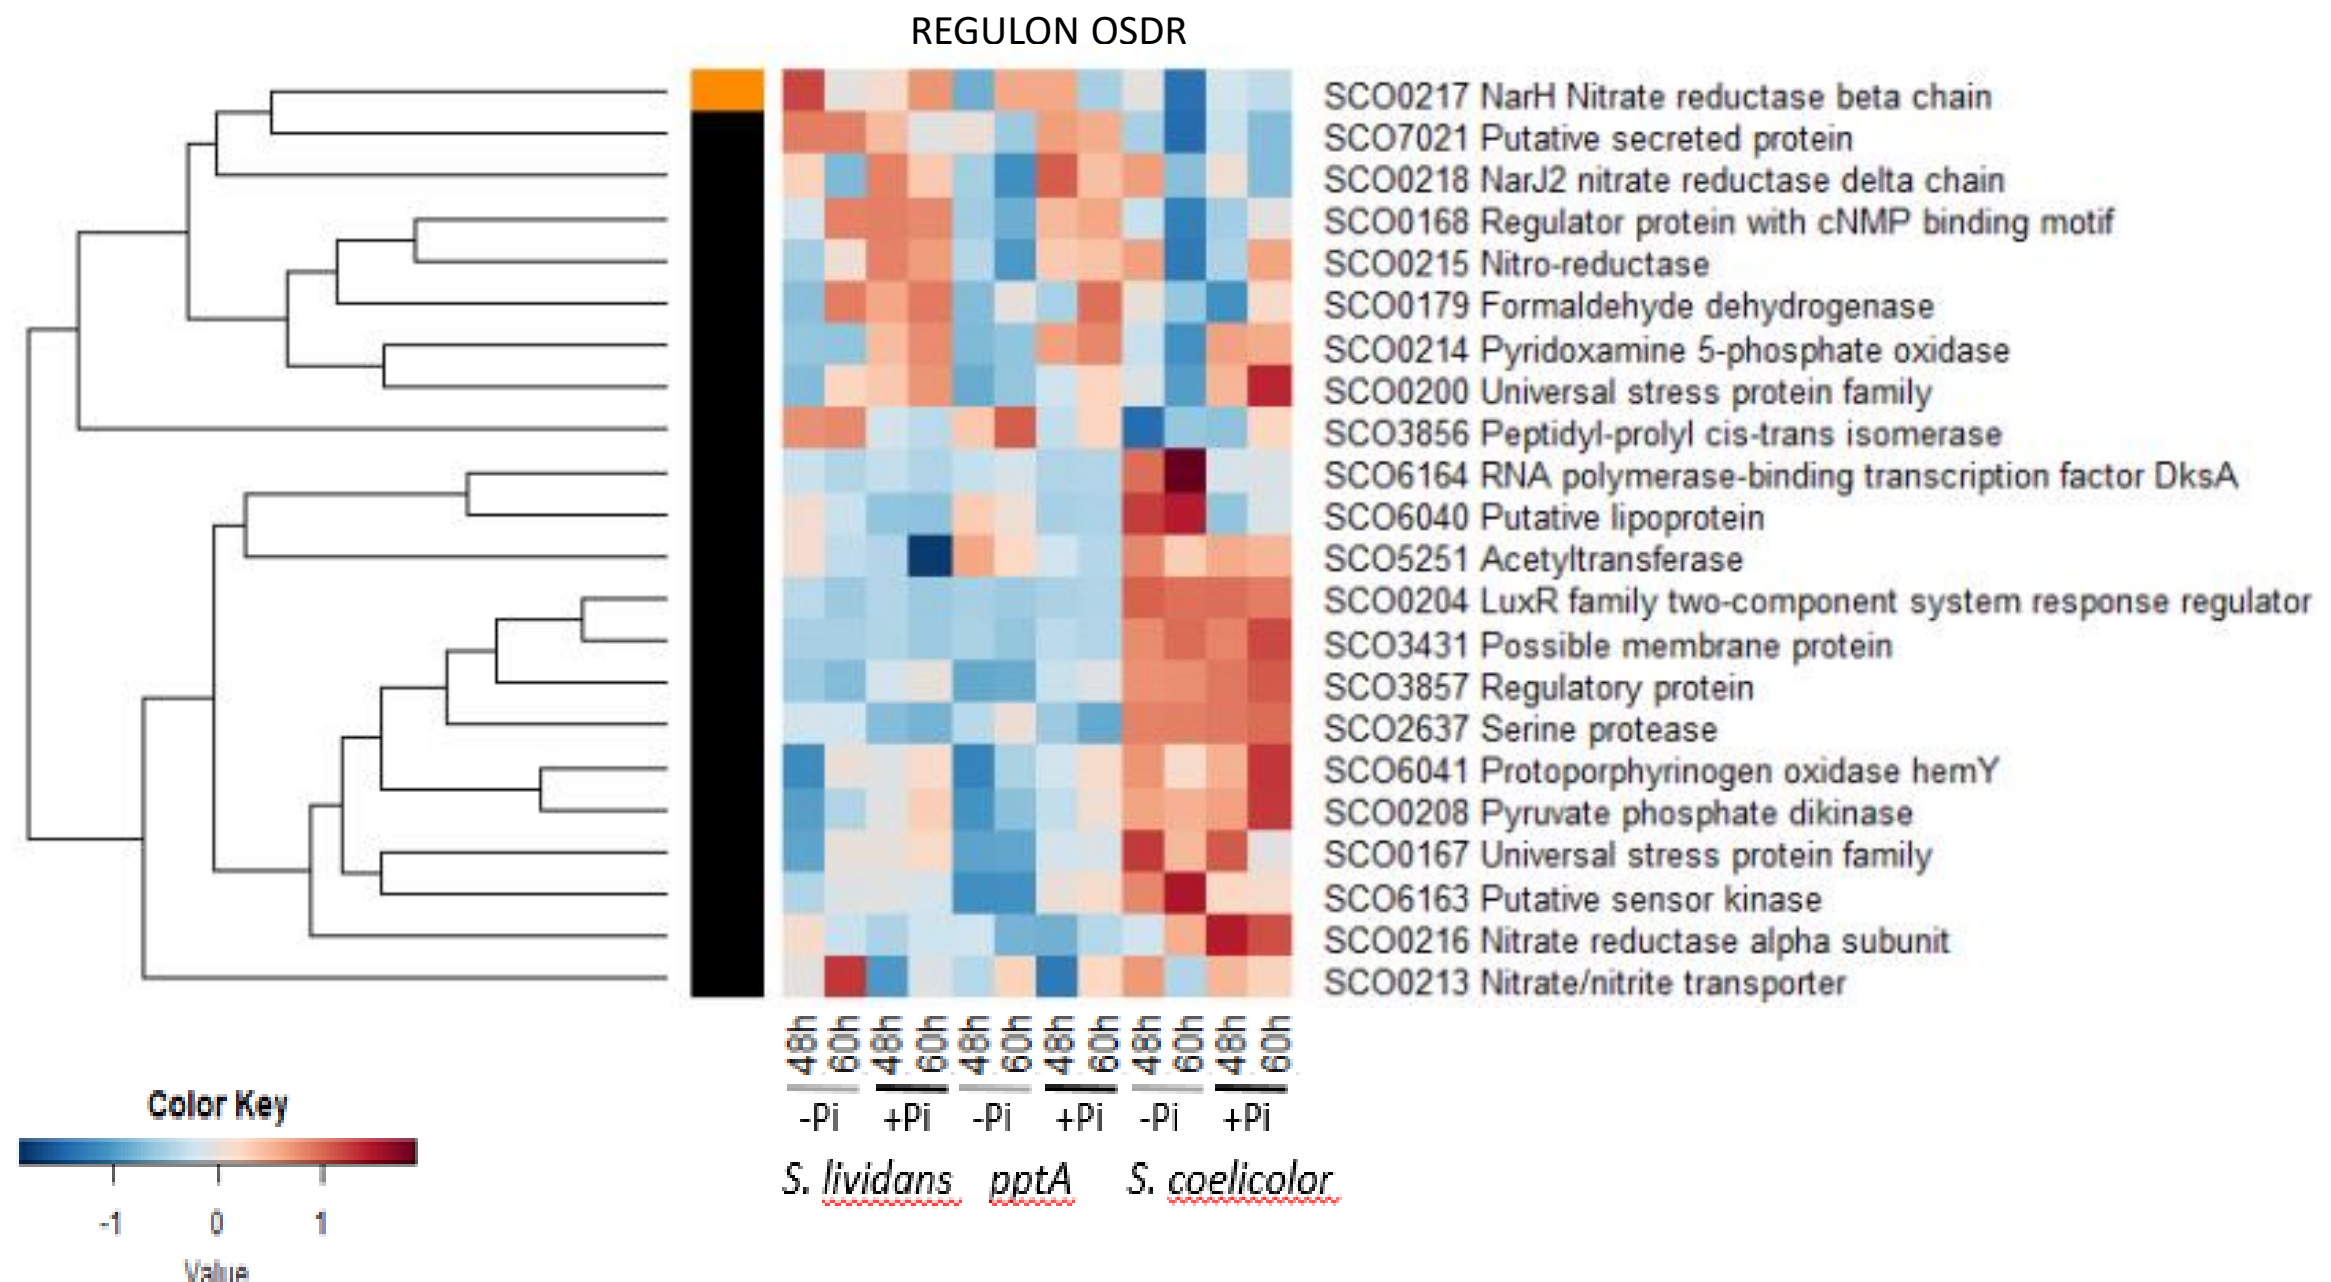

Figure S12

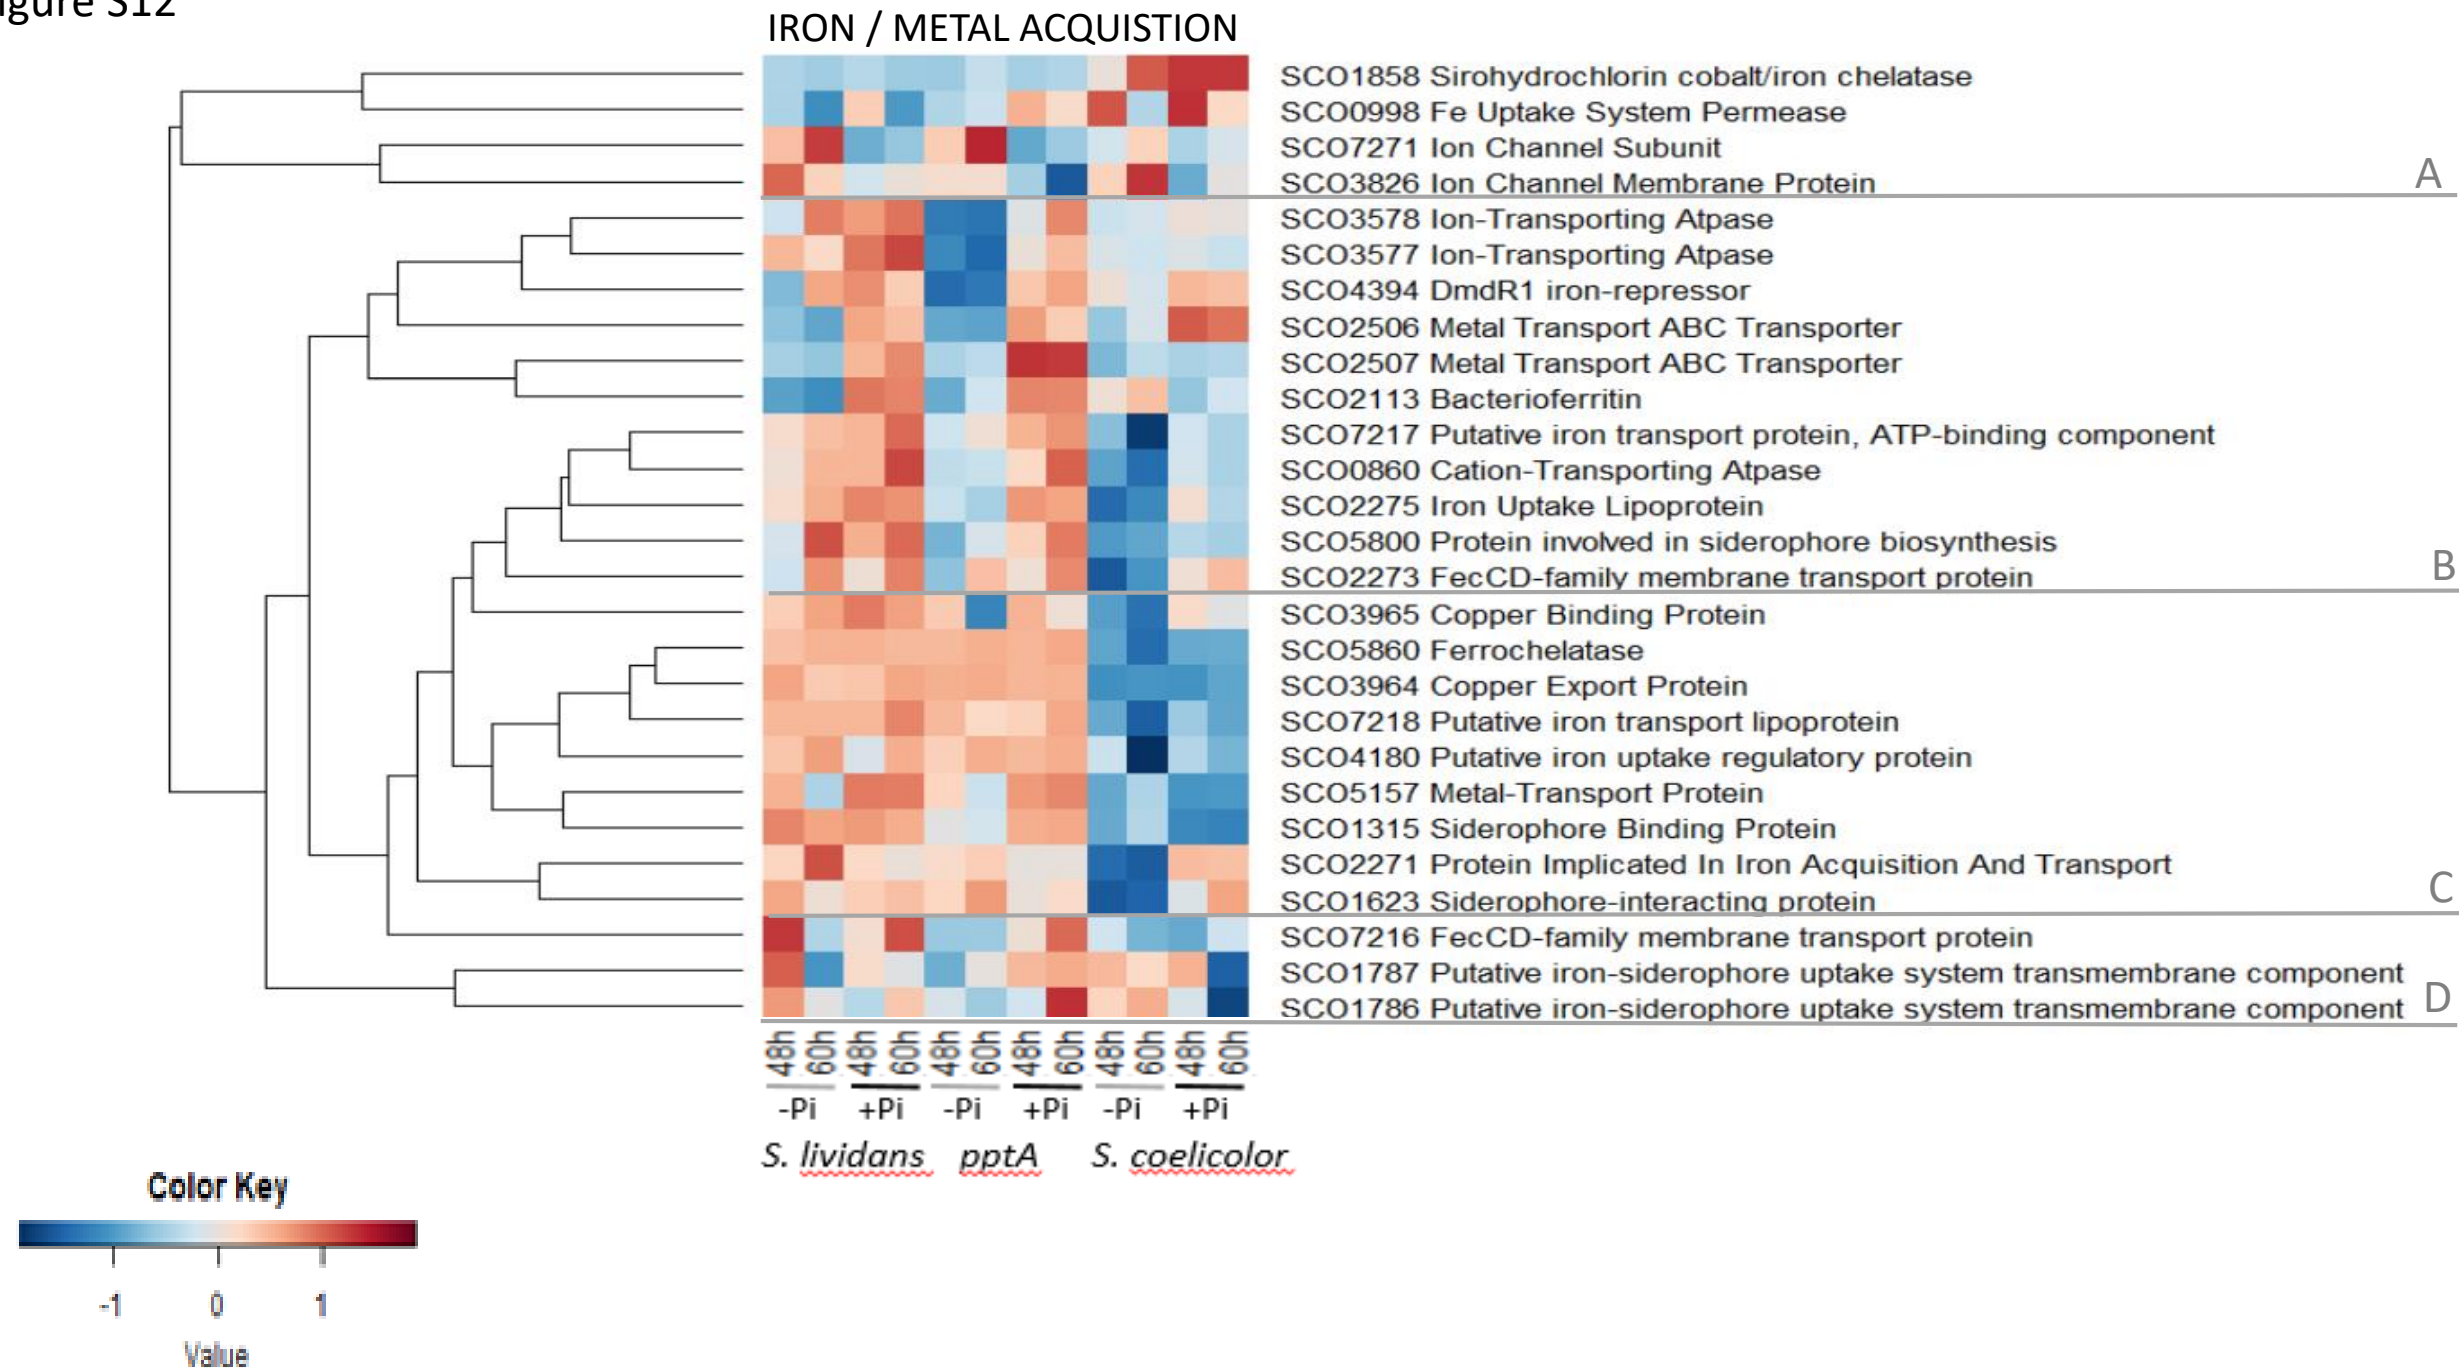

Figure S13

OTHER SPECIALIZED METABOLITES

TERPENES BIOSYNTHESIS

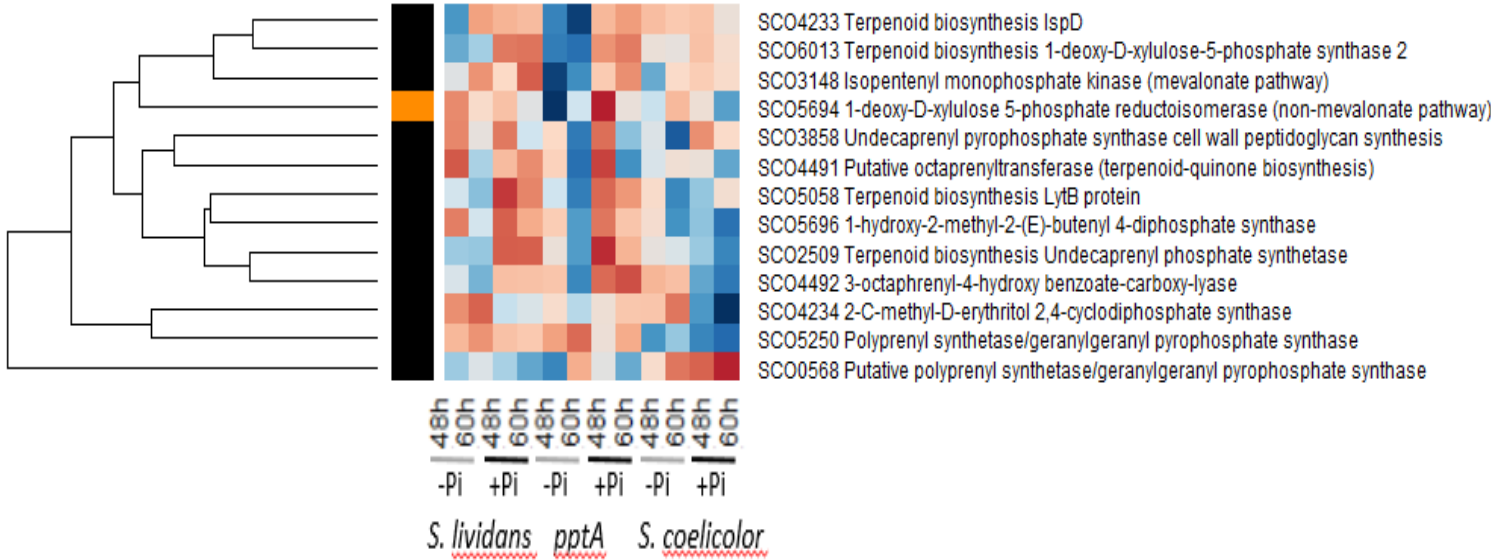

HOPENE BIOSYNTHETIC CLUSTER

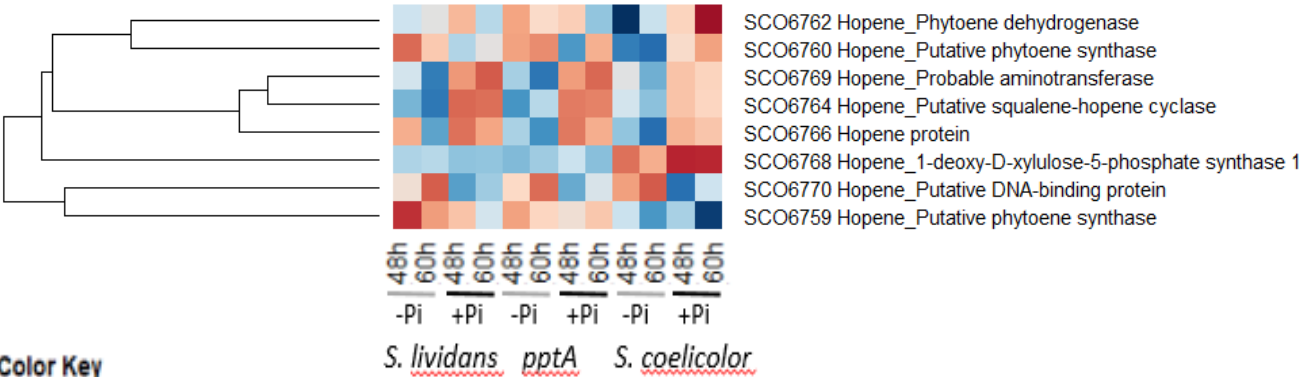

HYDROXYECTOINE BIOSYNTHETIC CLUSTER

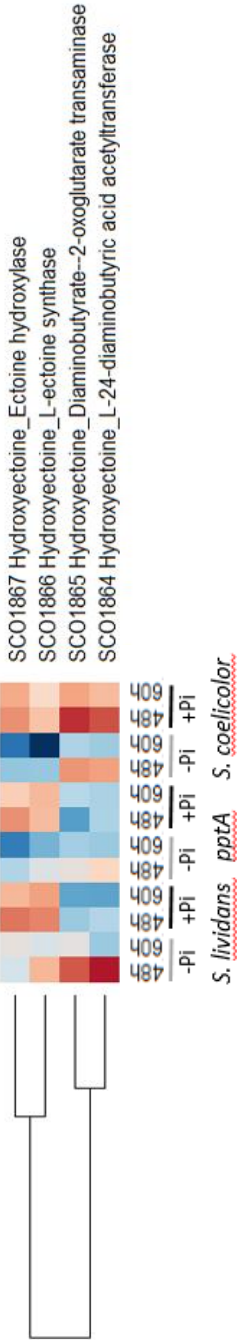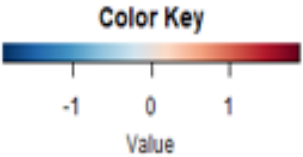

# VITAMINS BIOSYNTHESIS

Figure S14A

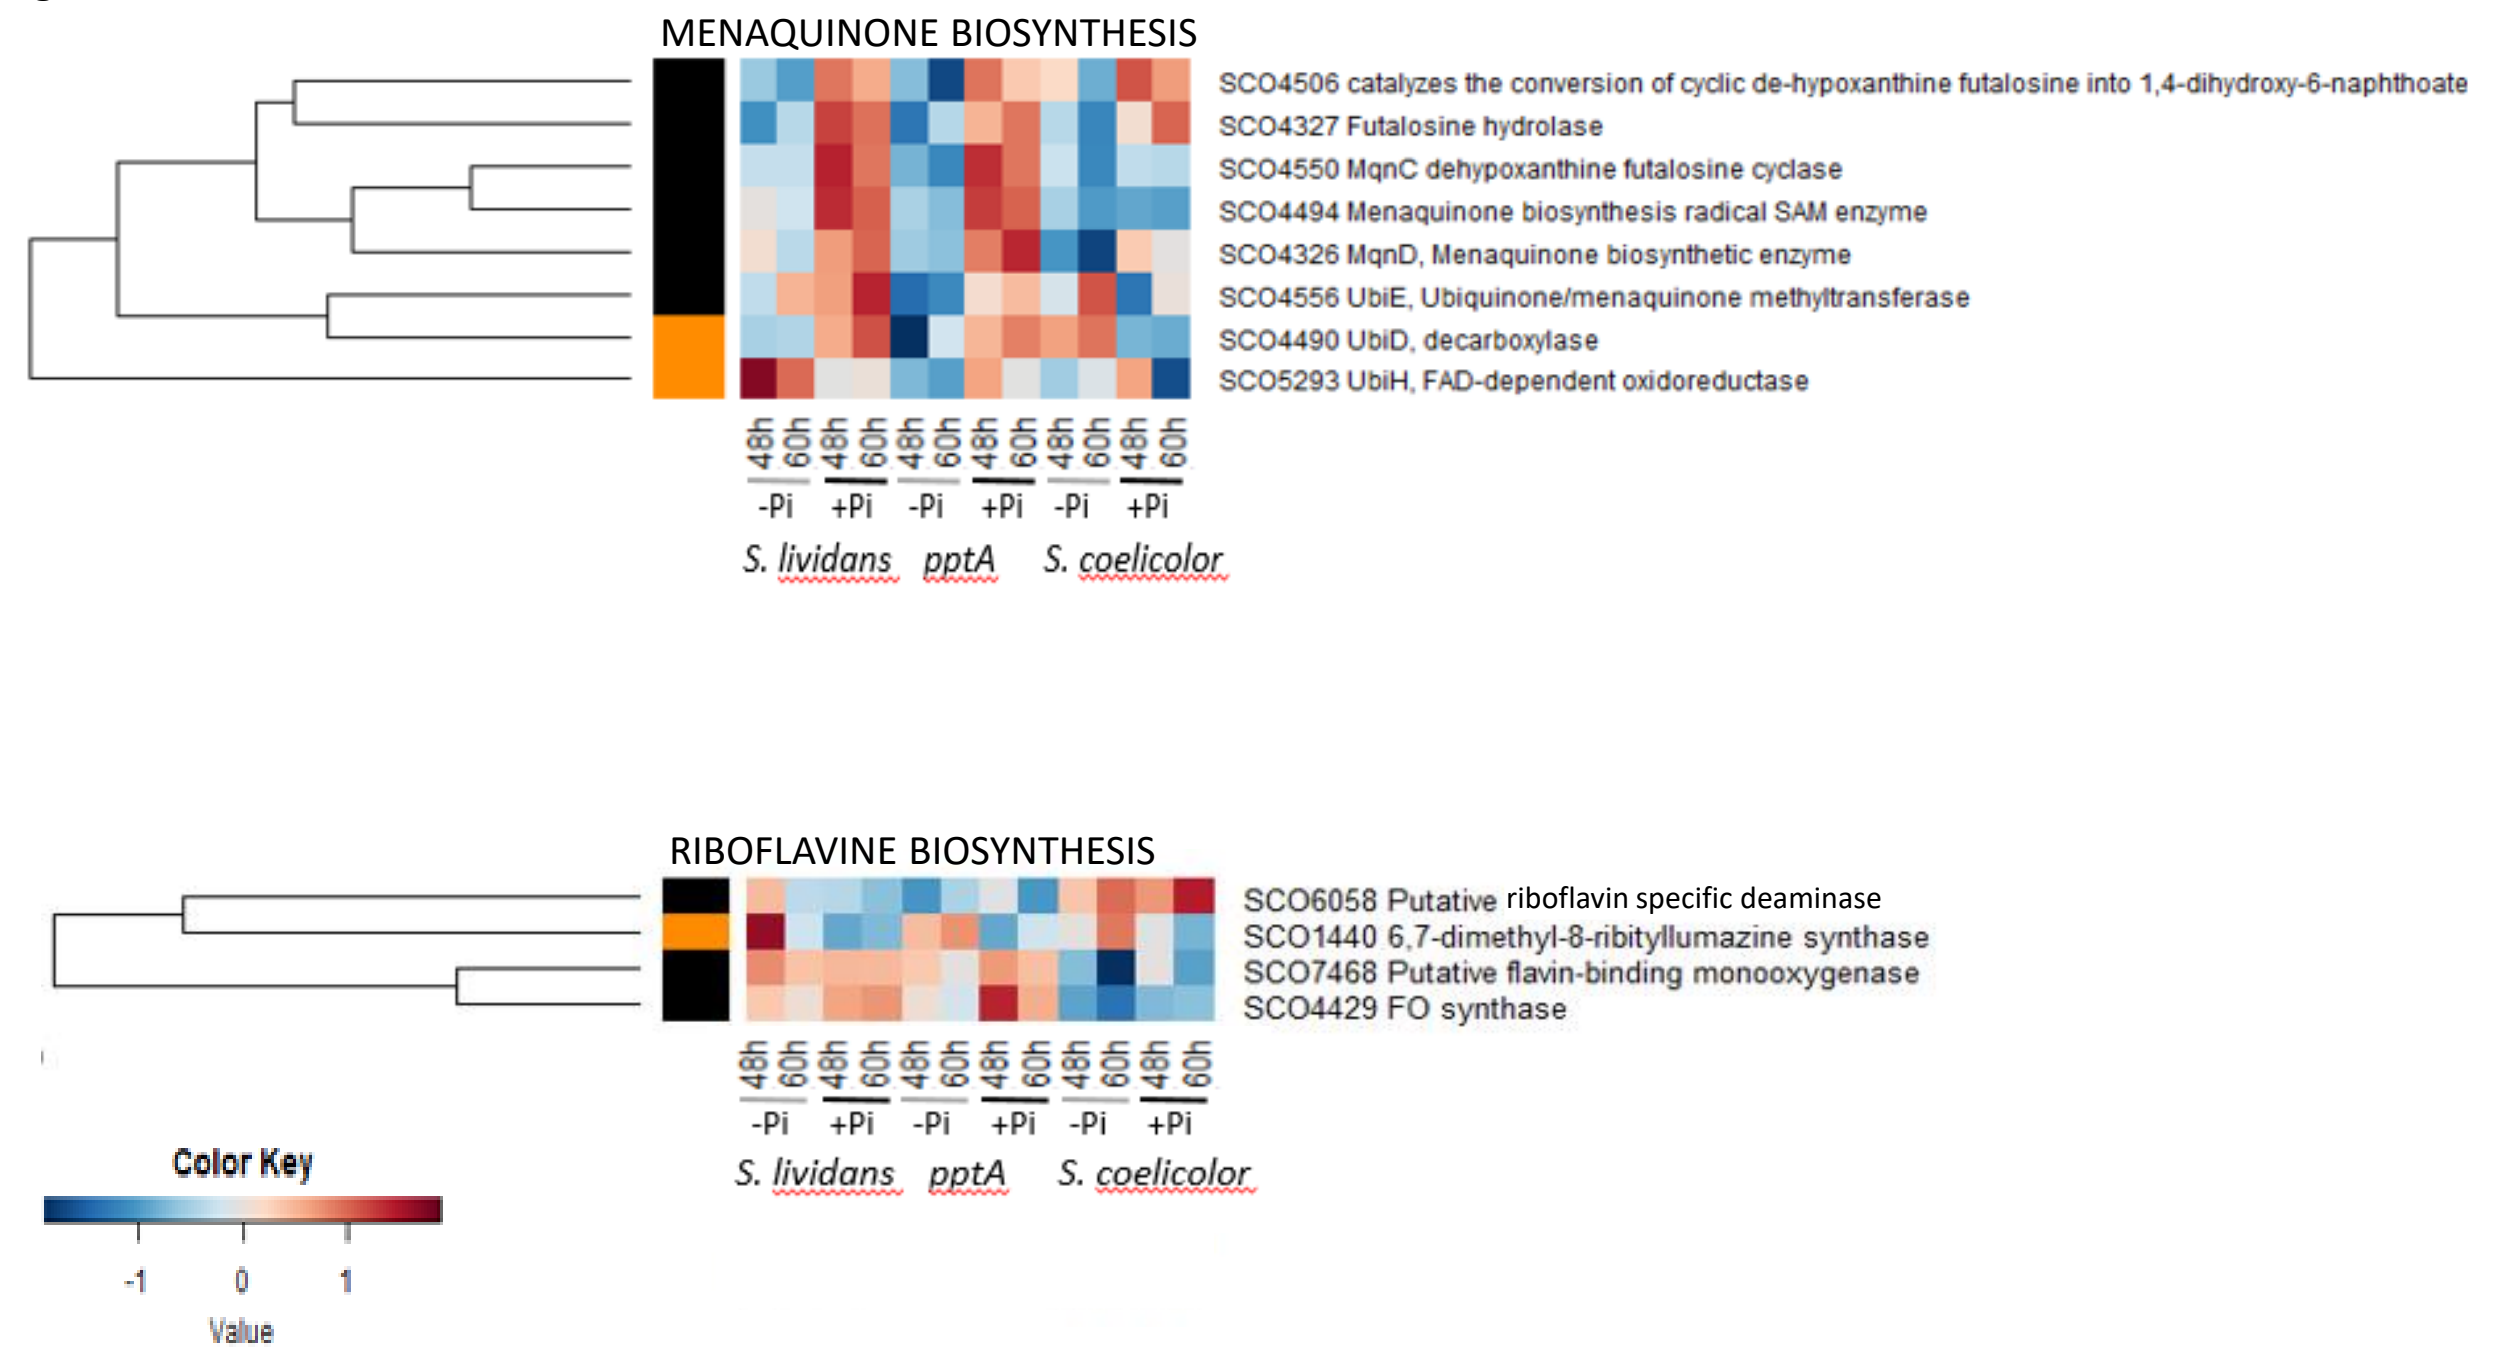

Figure S14B

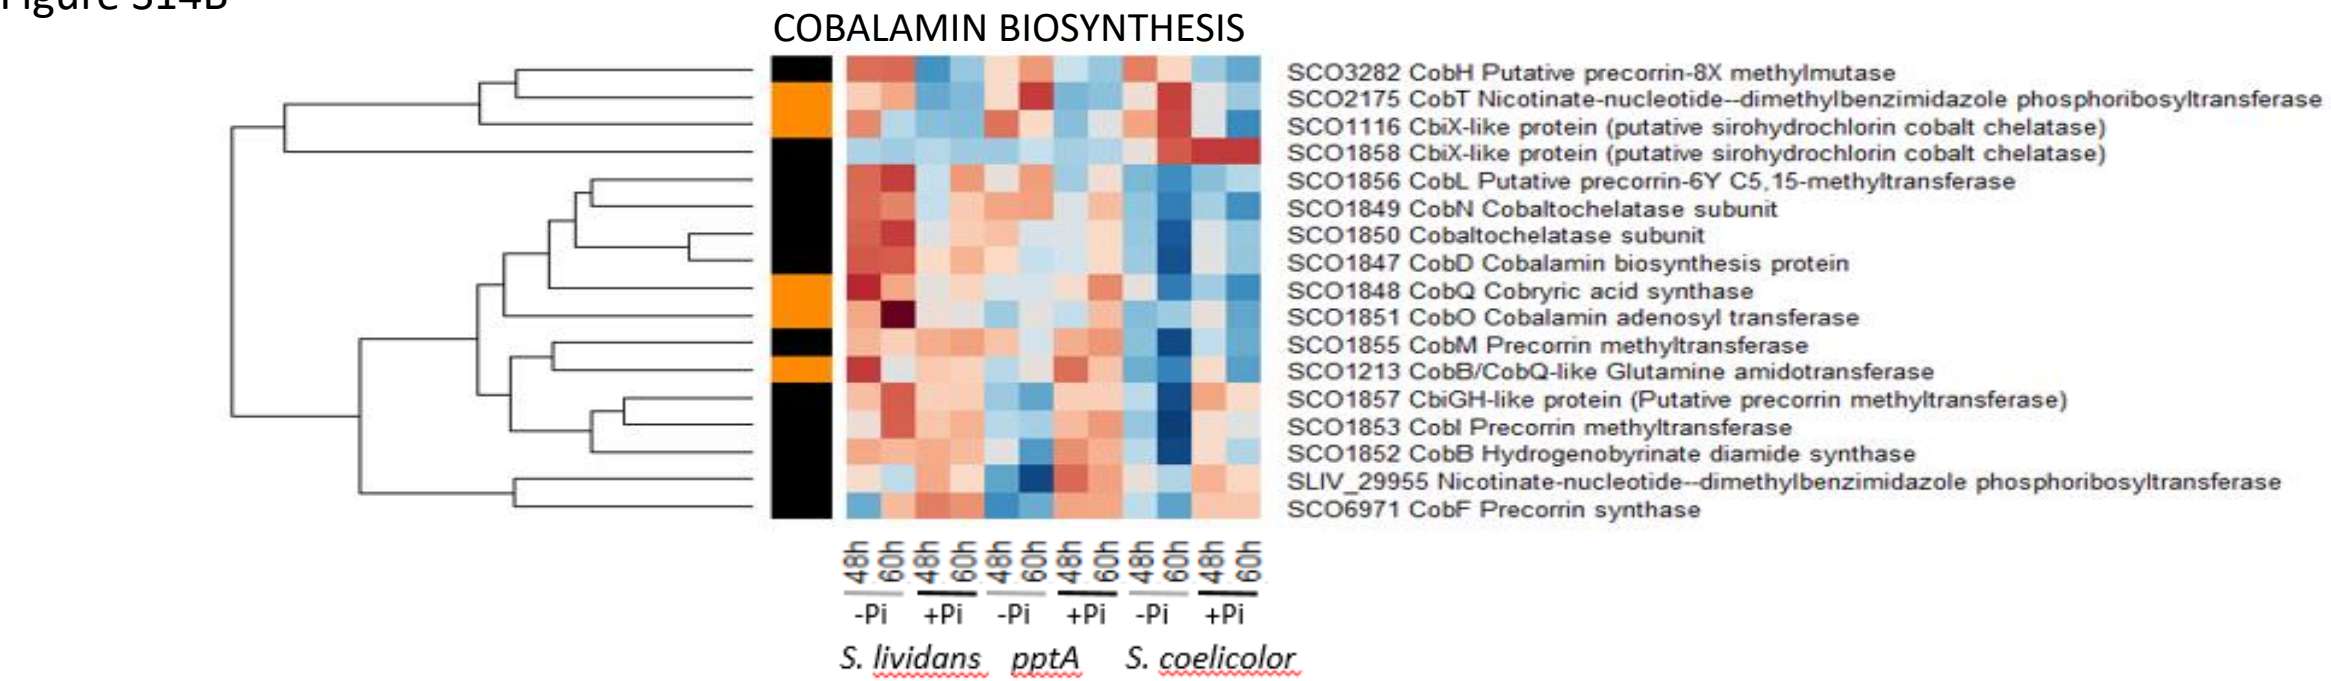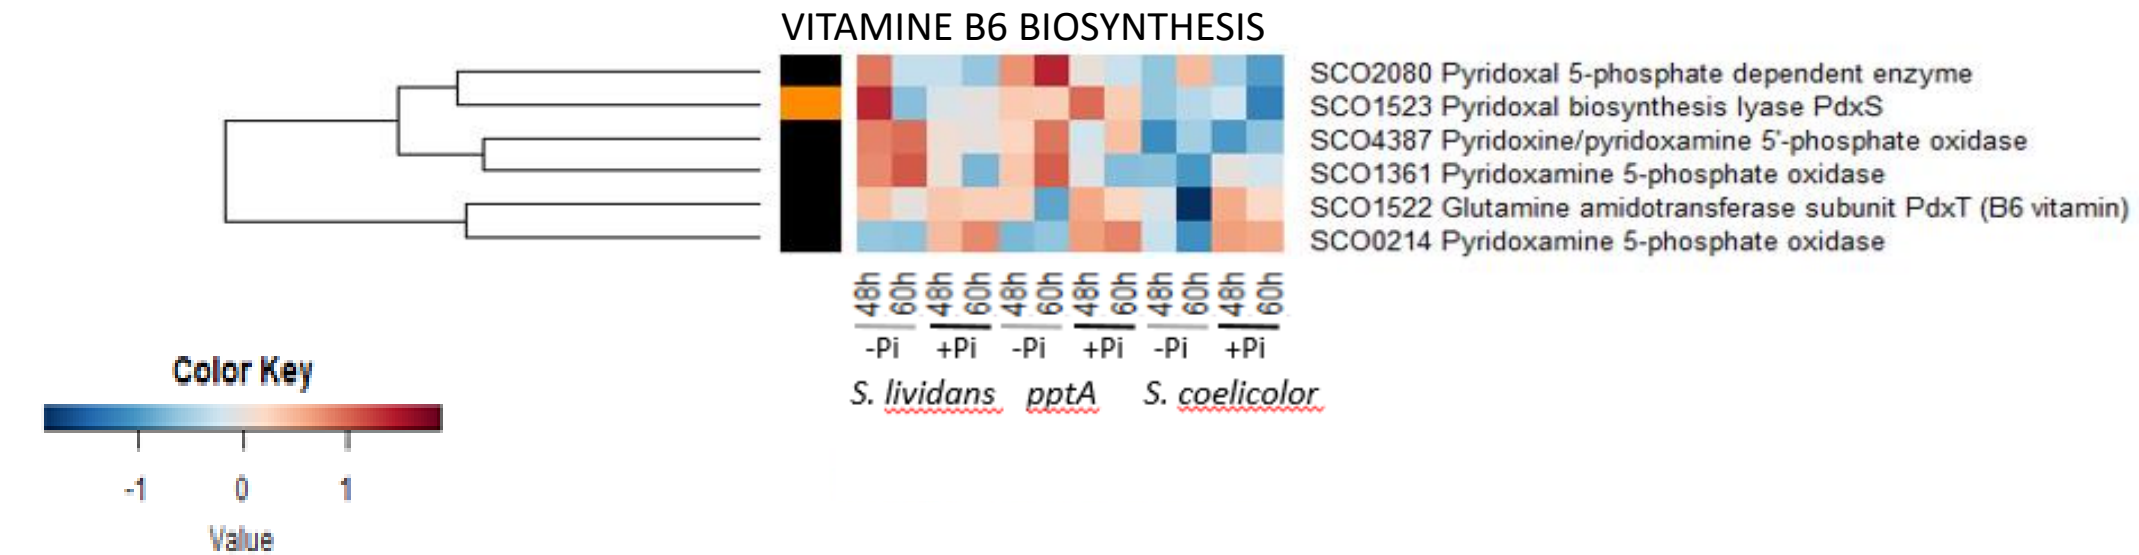

Figure S14C

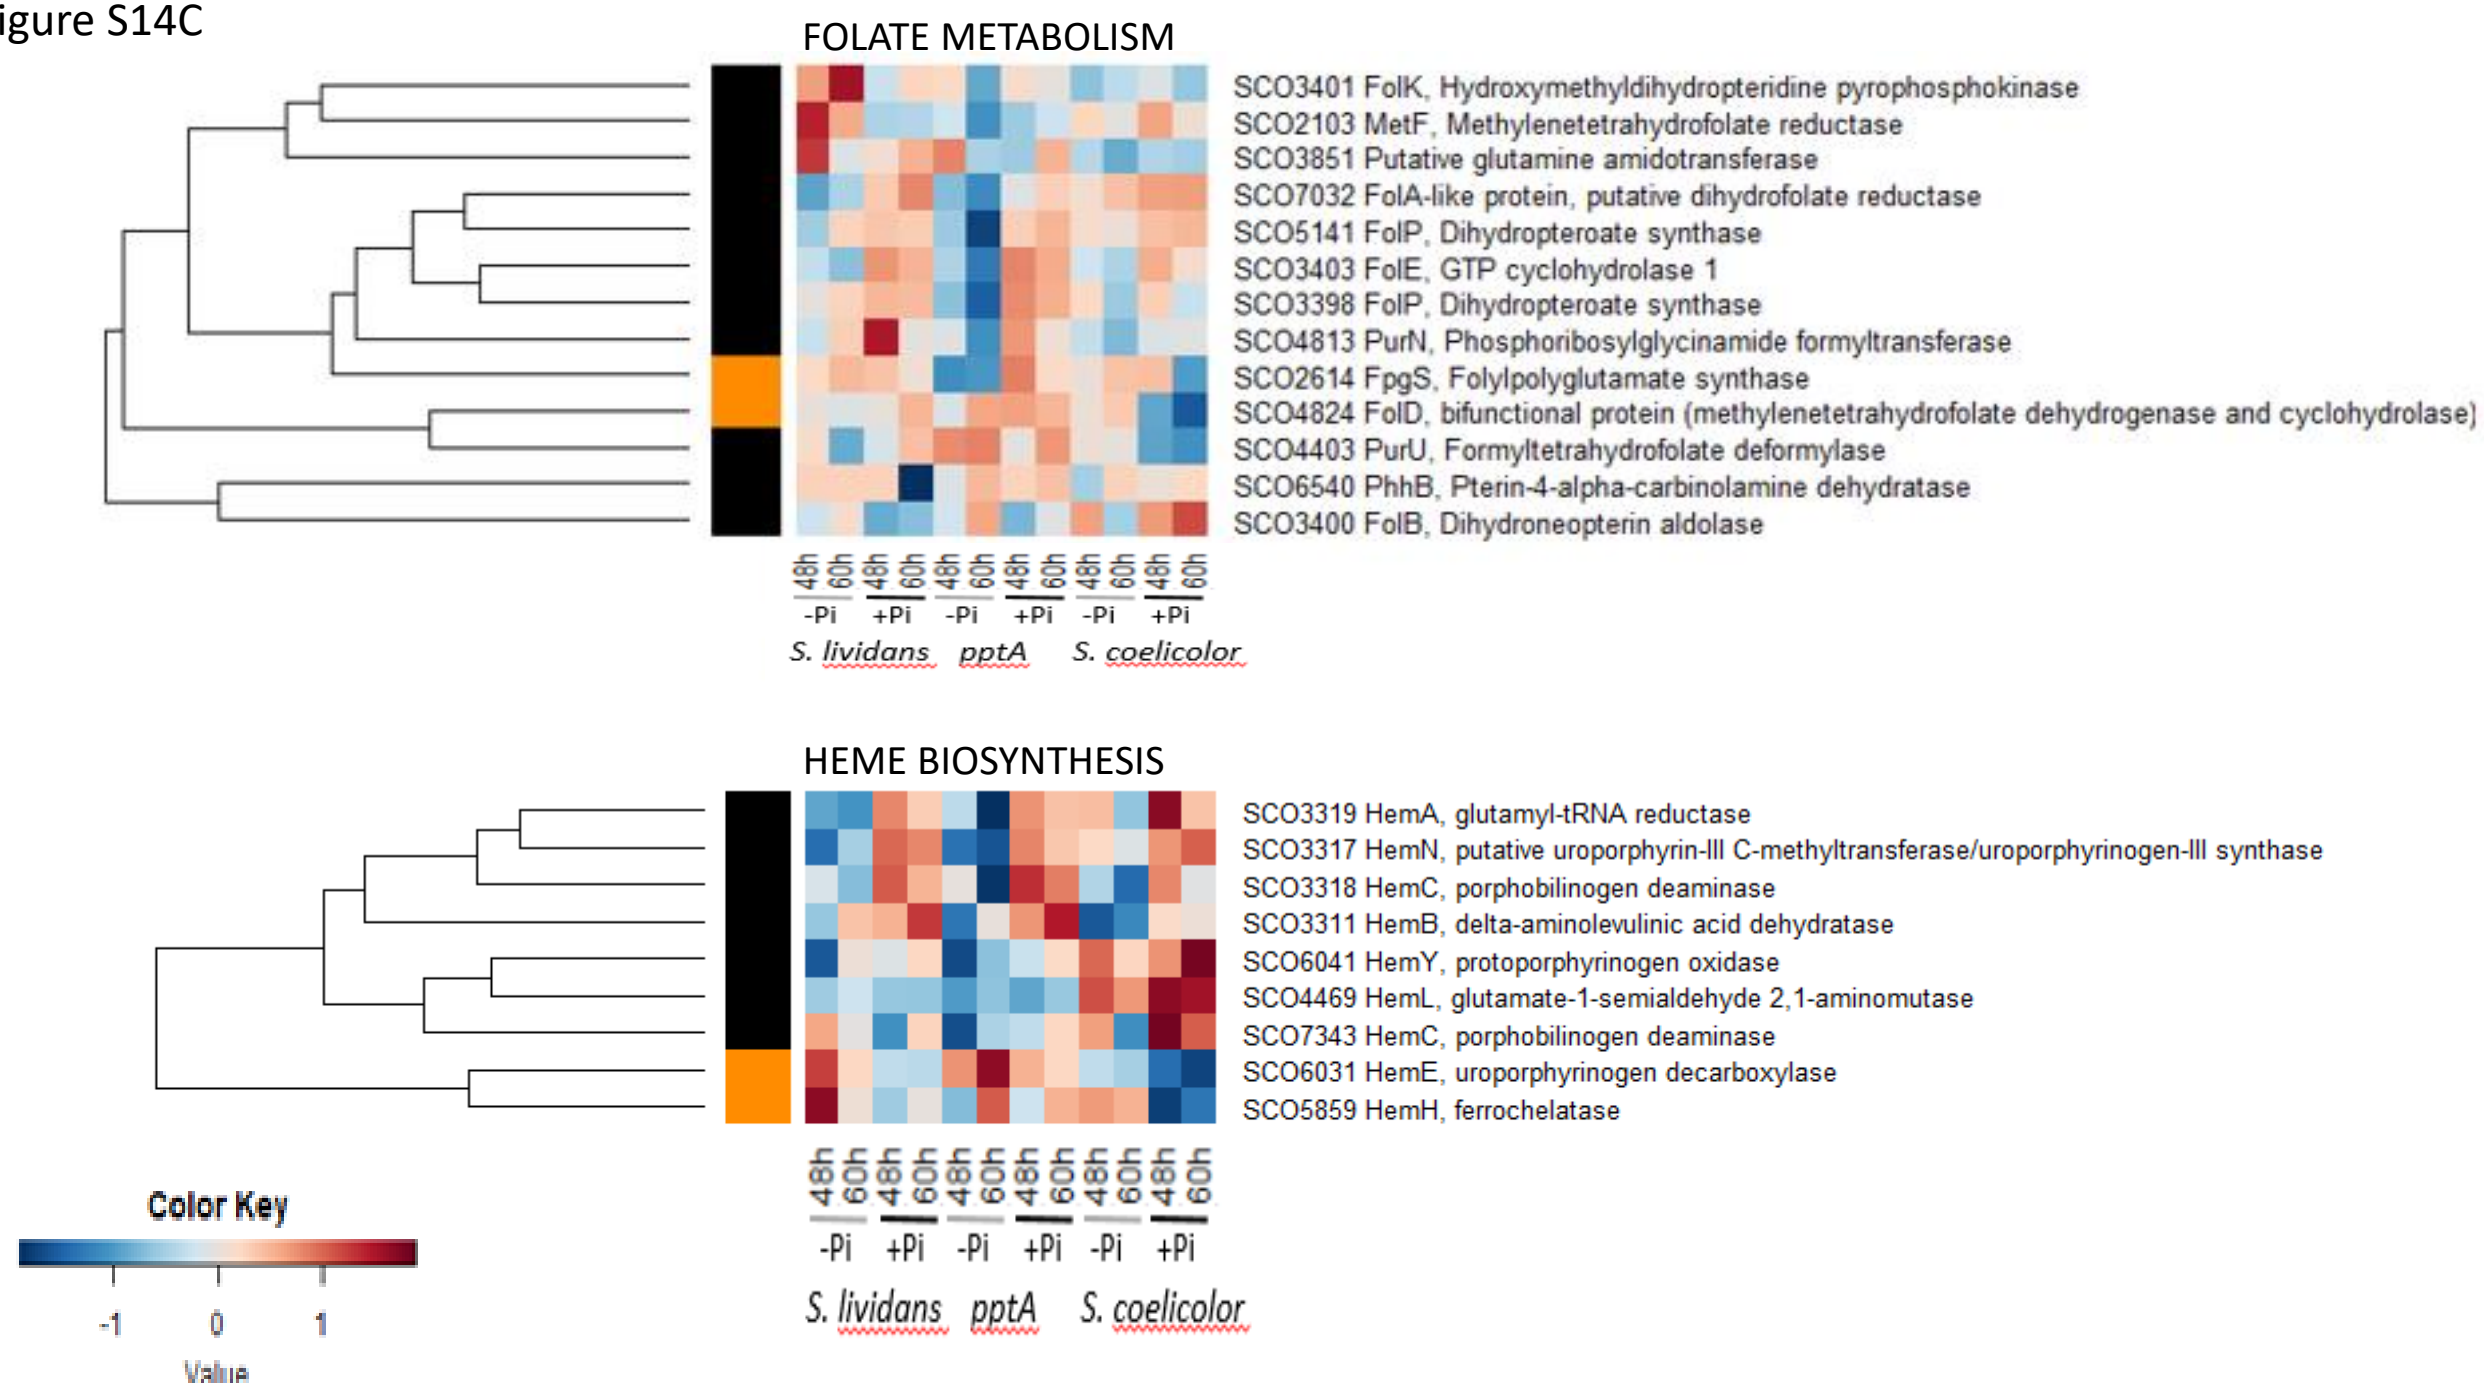

Figure S14D

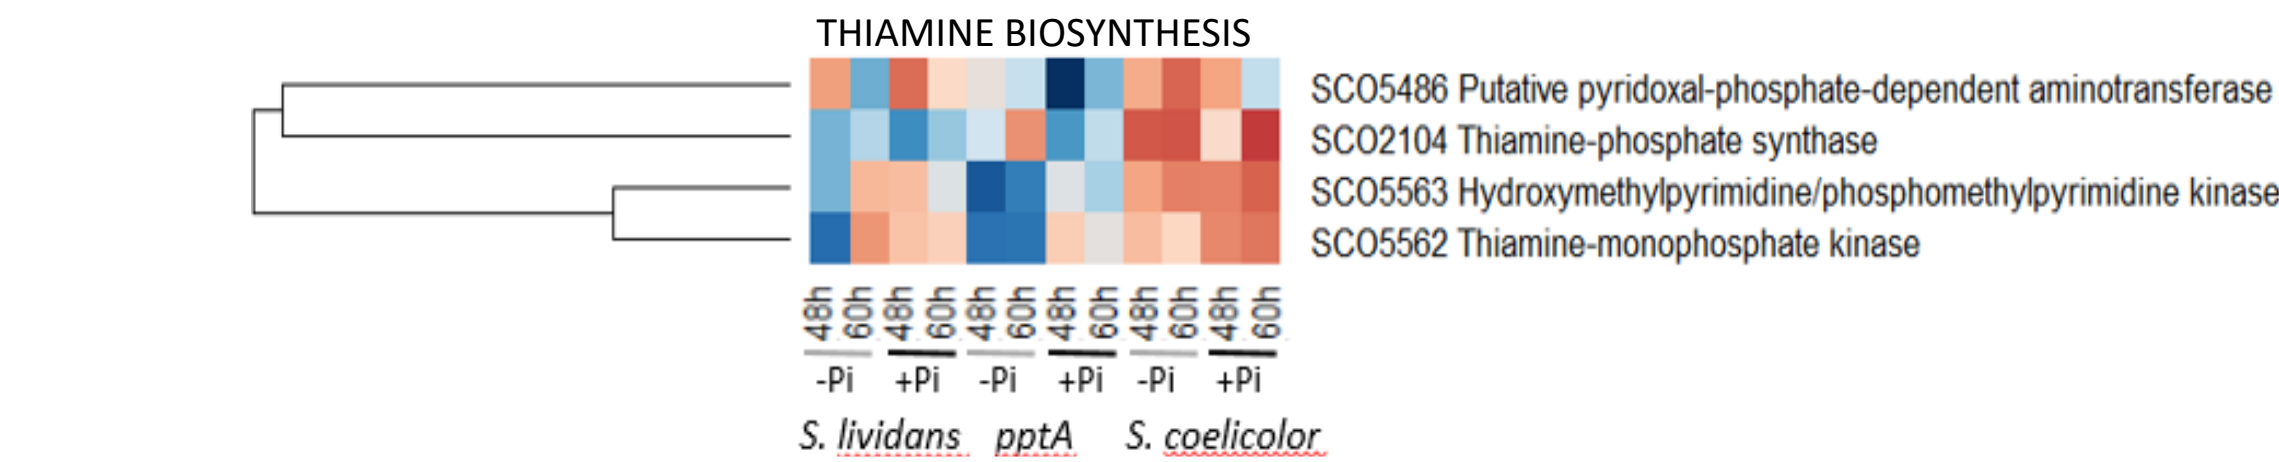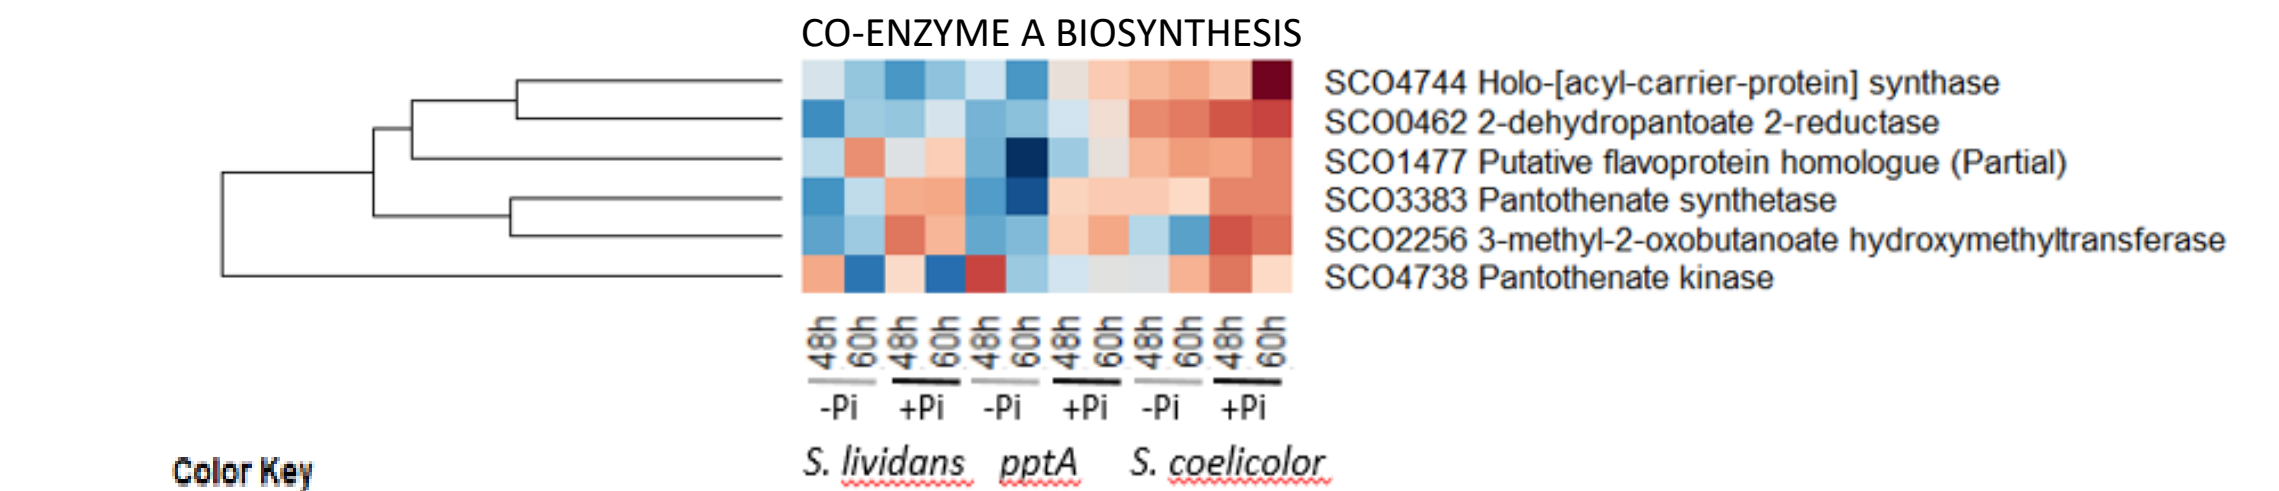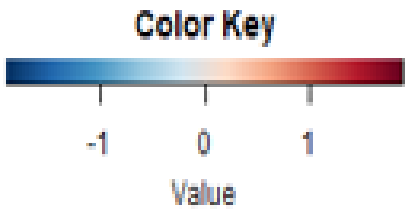

Figure S14E

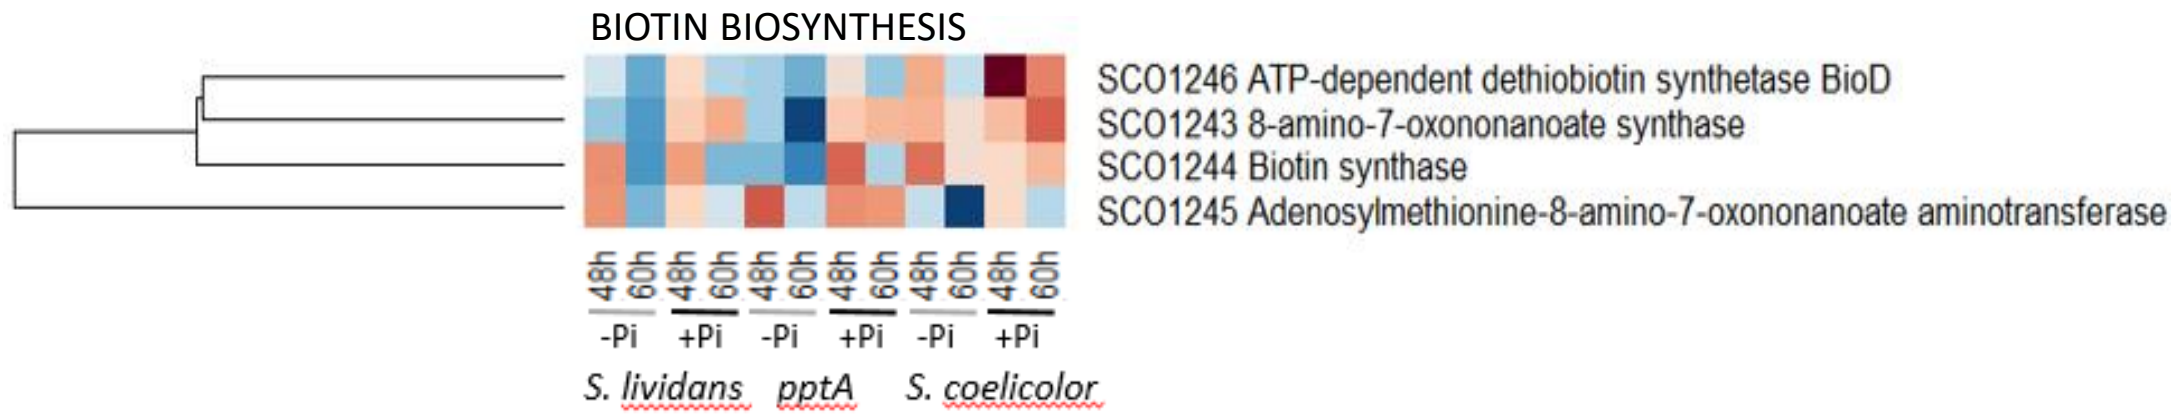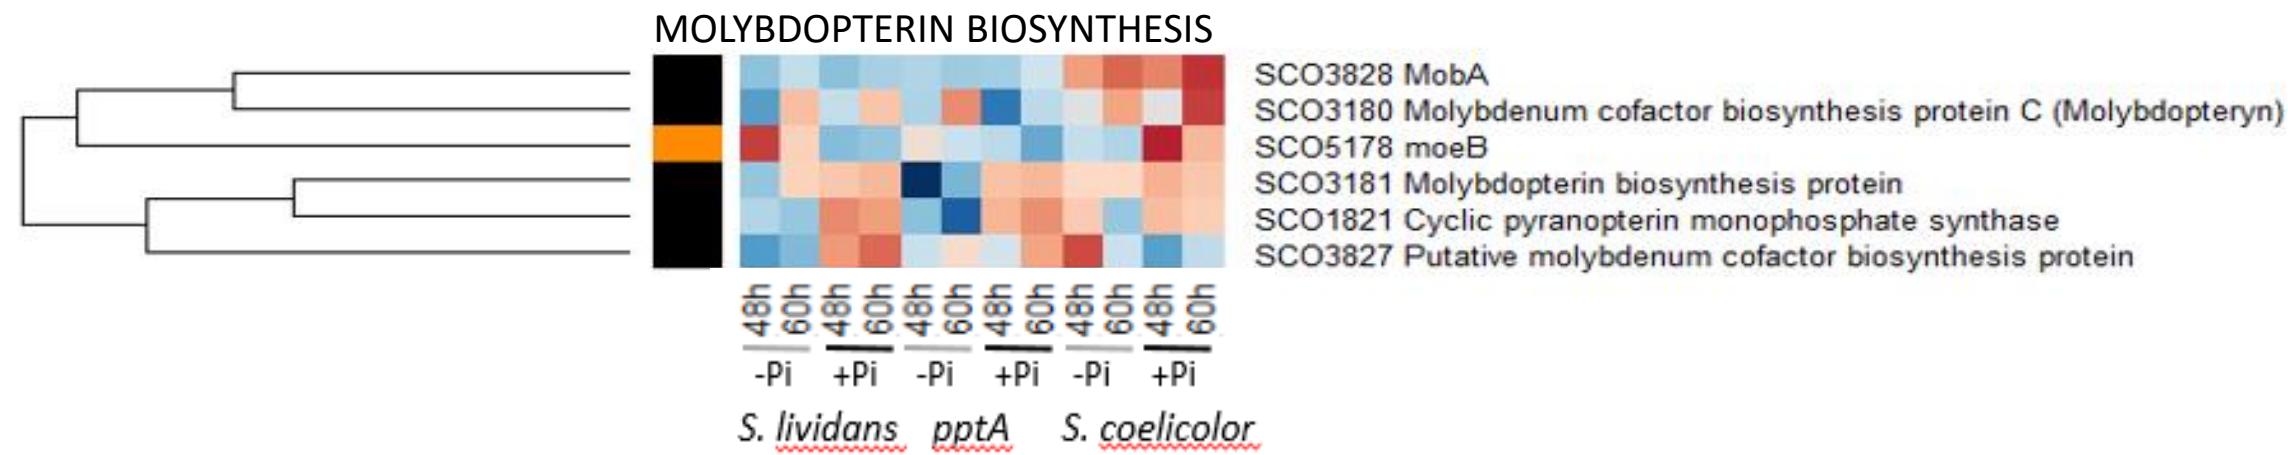

# TRANSPORT SYSTEMS

Figure S15A

TRANSPORT SYSTEMS INDUCED IN PHOSPHATE LIMITATION IN THE THREE STRAINS

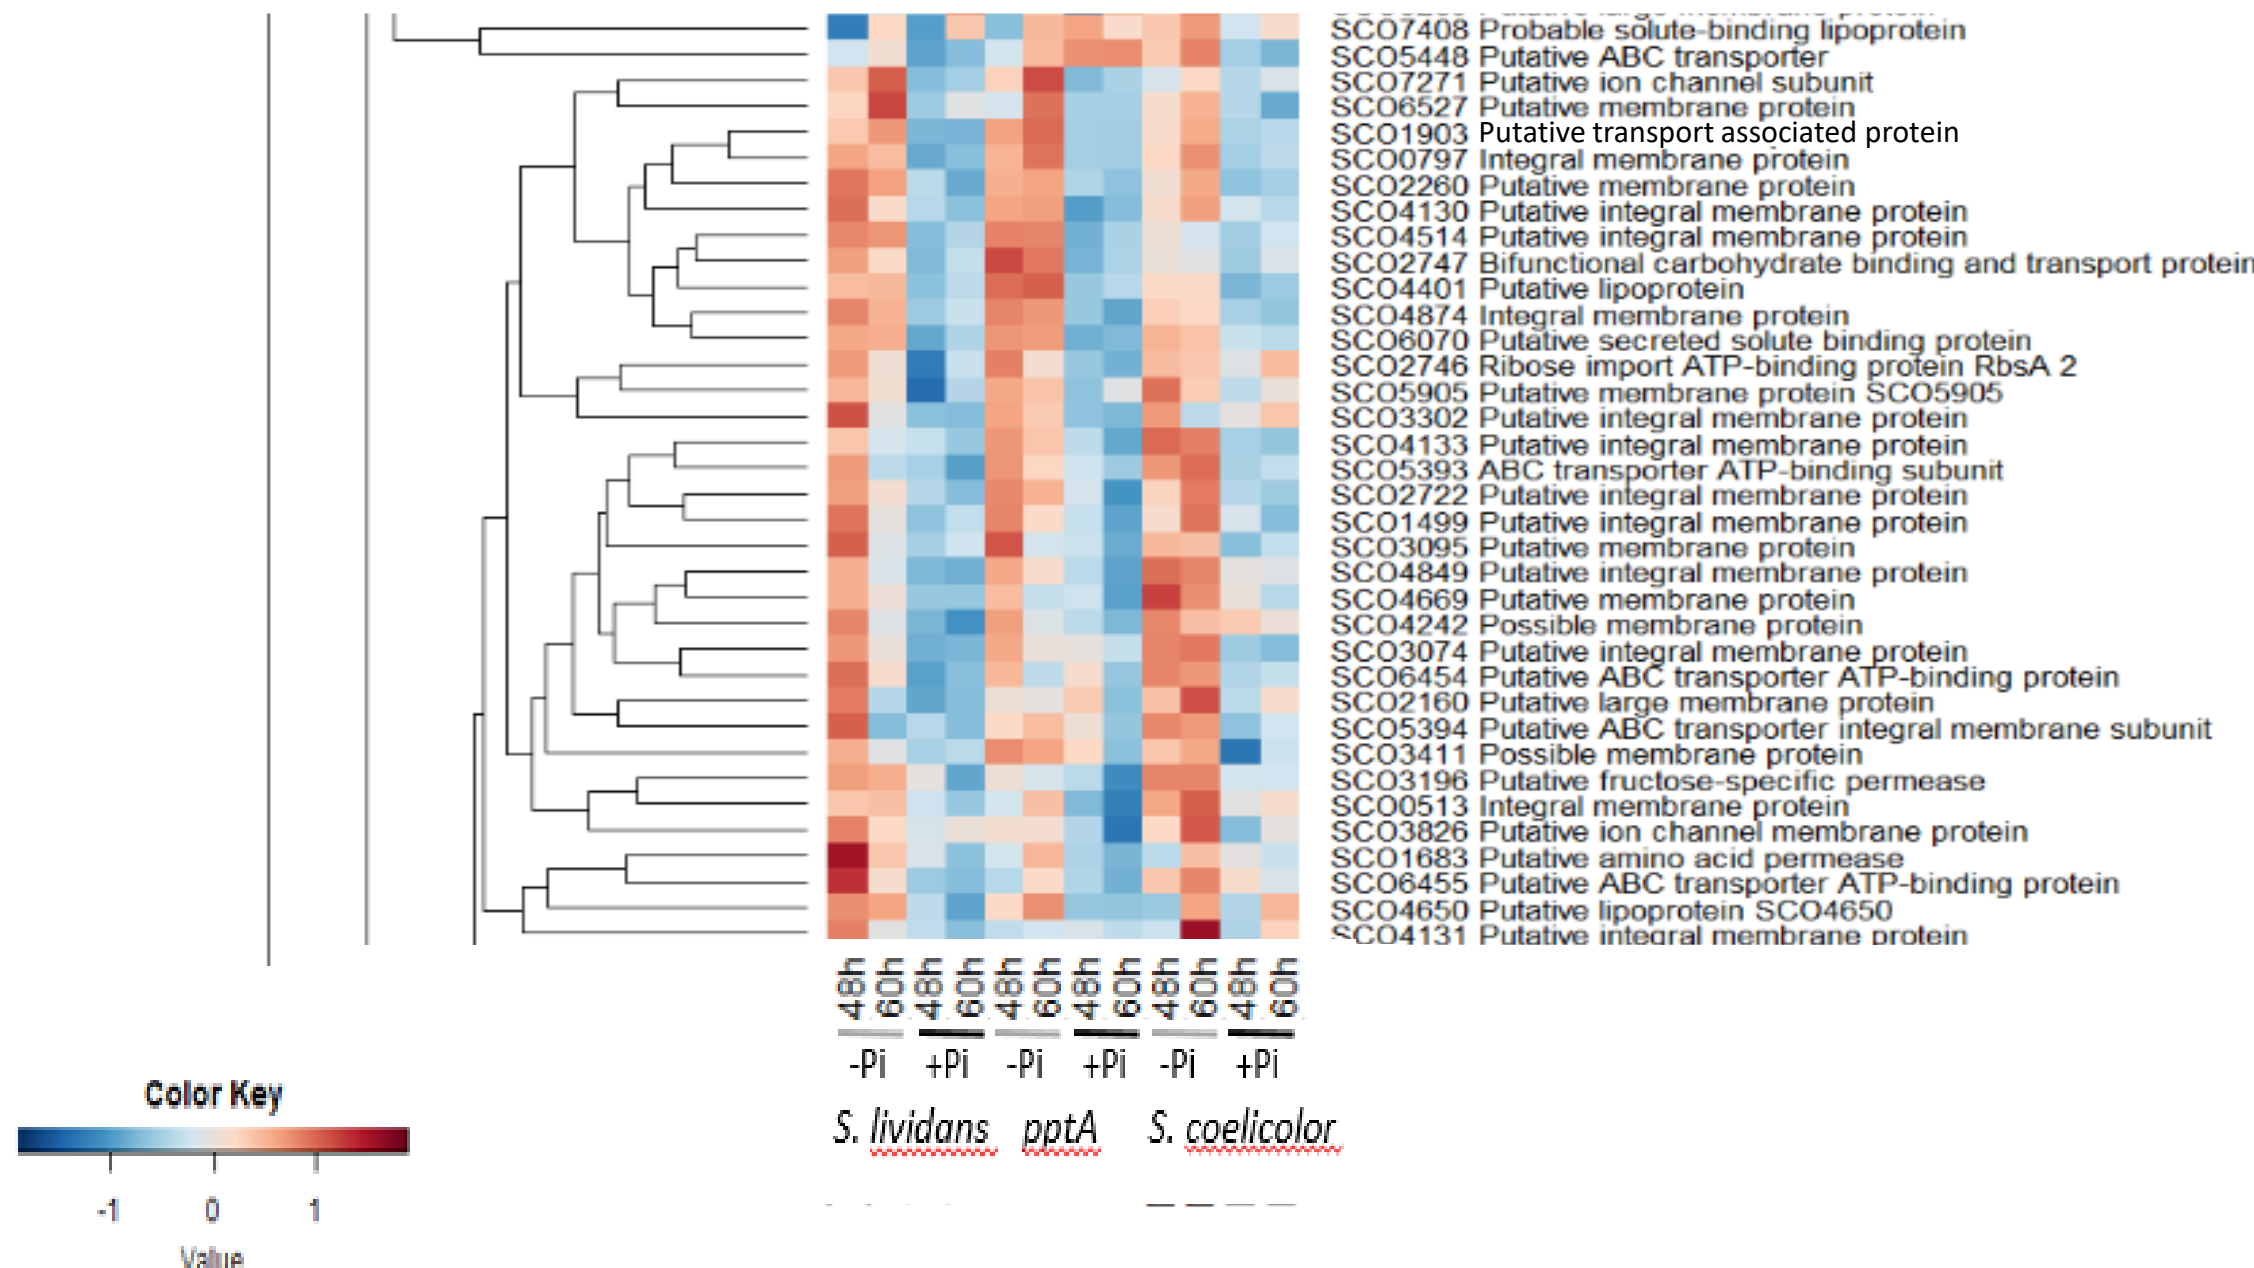

Figure S15B

TRANSPORT SYSTEMS INDUCED IN PHOSPHATE LIMITATION IN THE THREE STRAINS

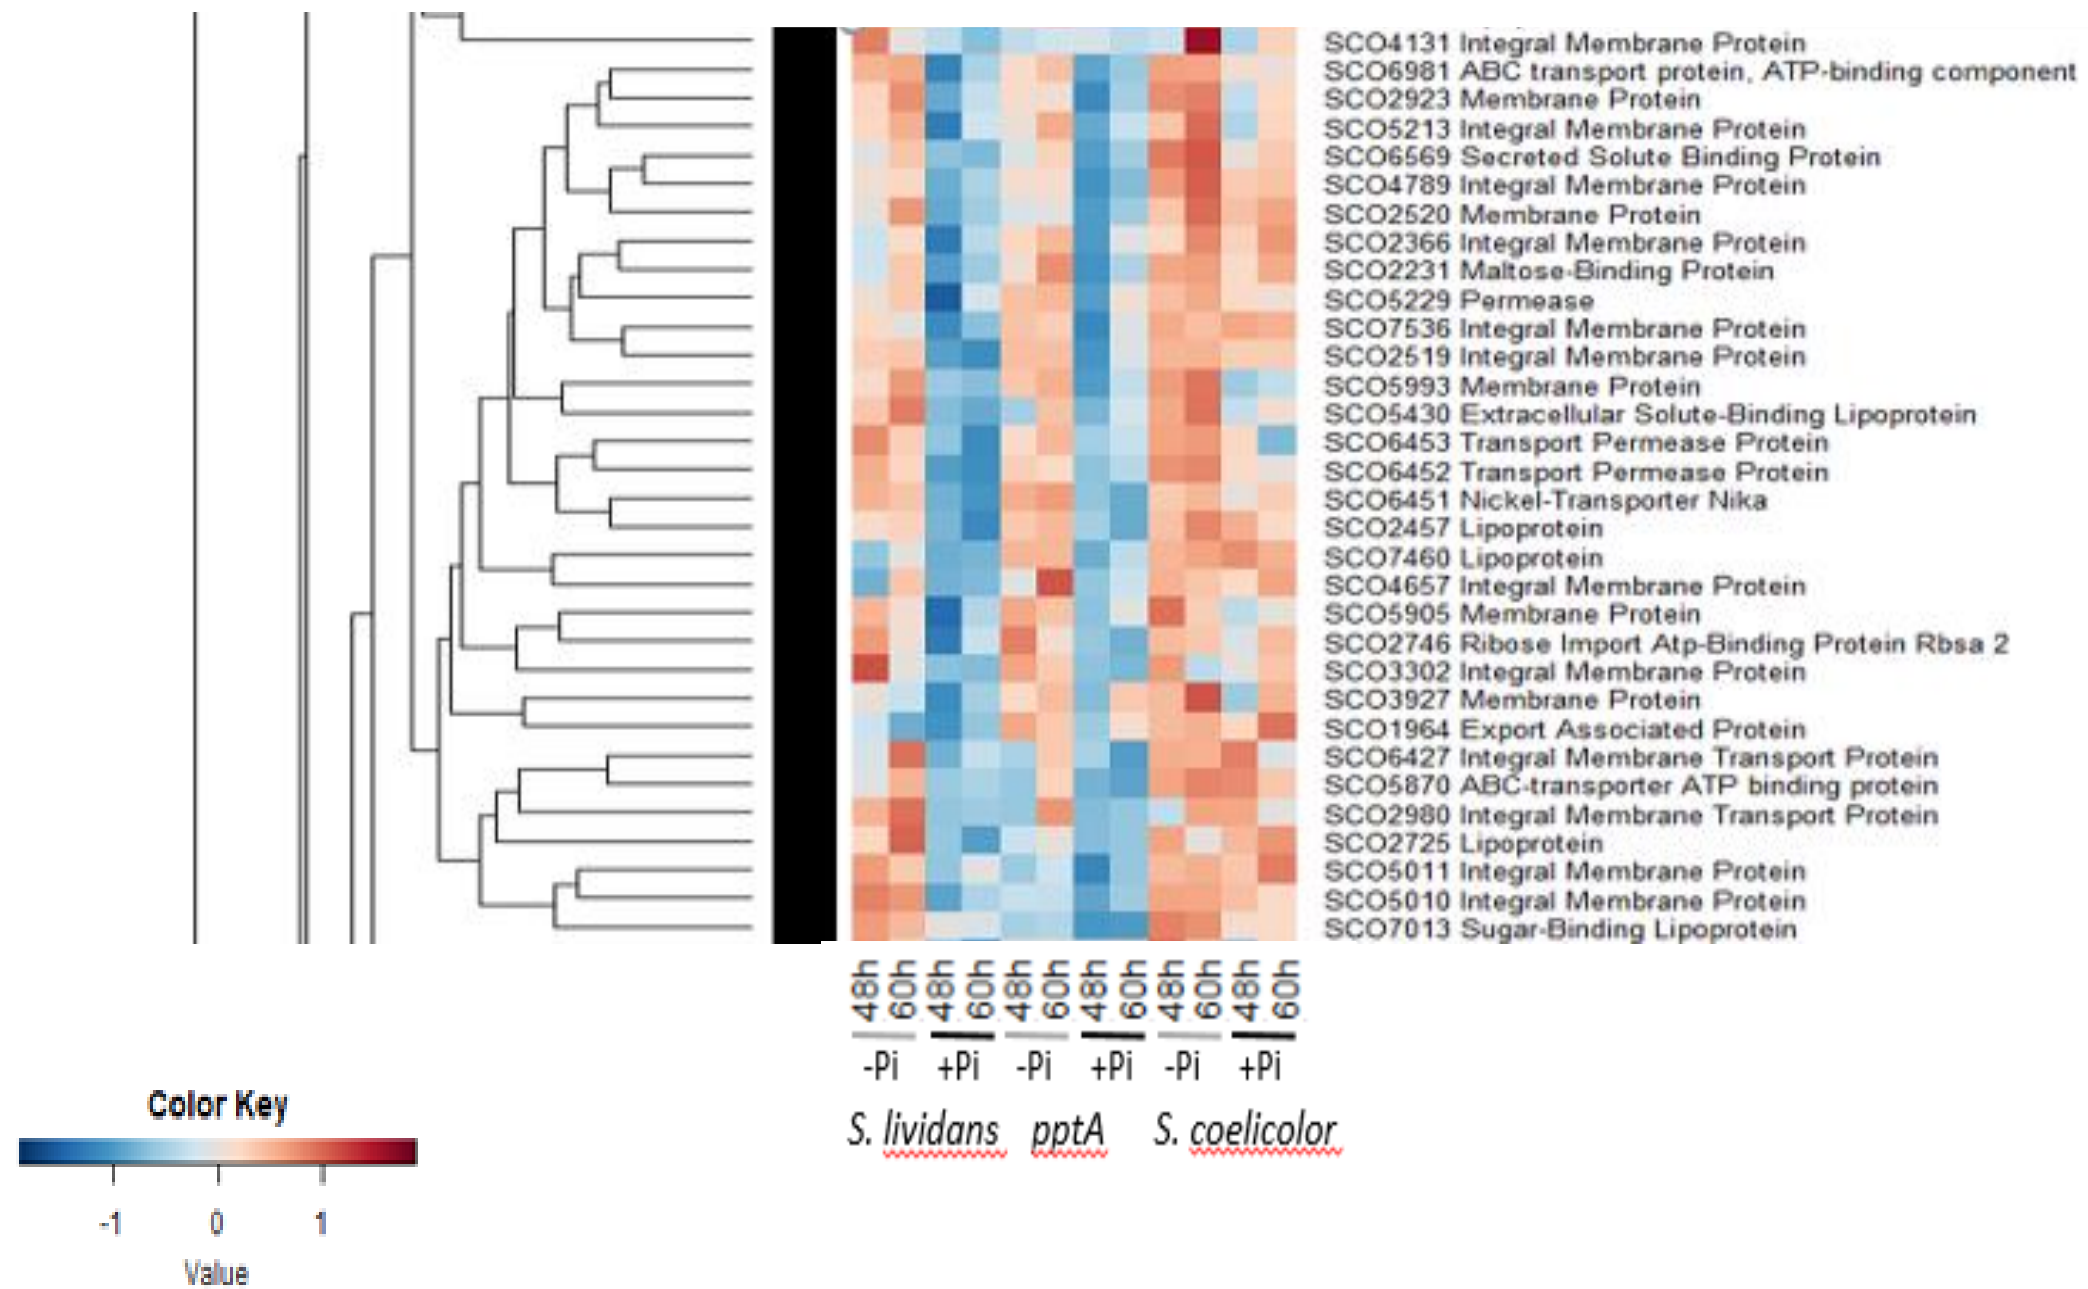

Figure S15C TRANSPORT SYSTEMS INDUCED IN PHOSPHATE LIMITATION ONLY IN THE *S. LIVIDANS* STRAINS

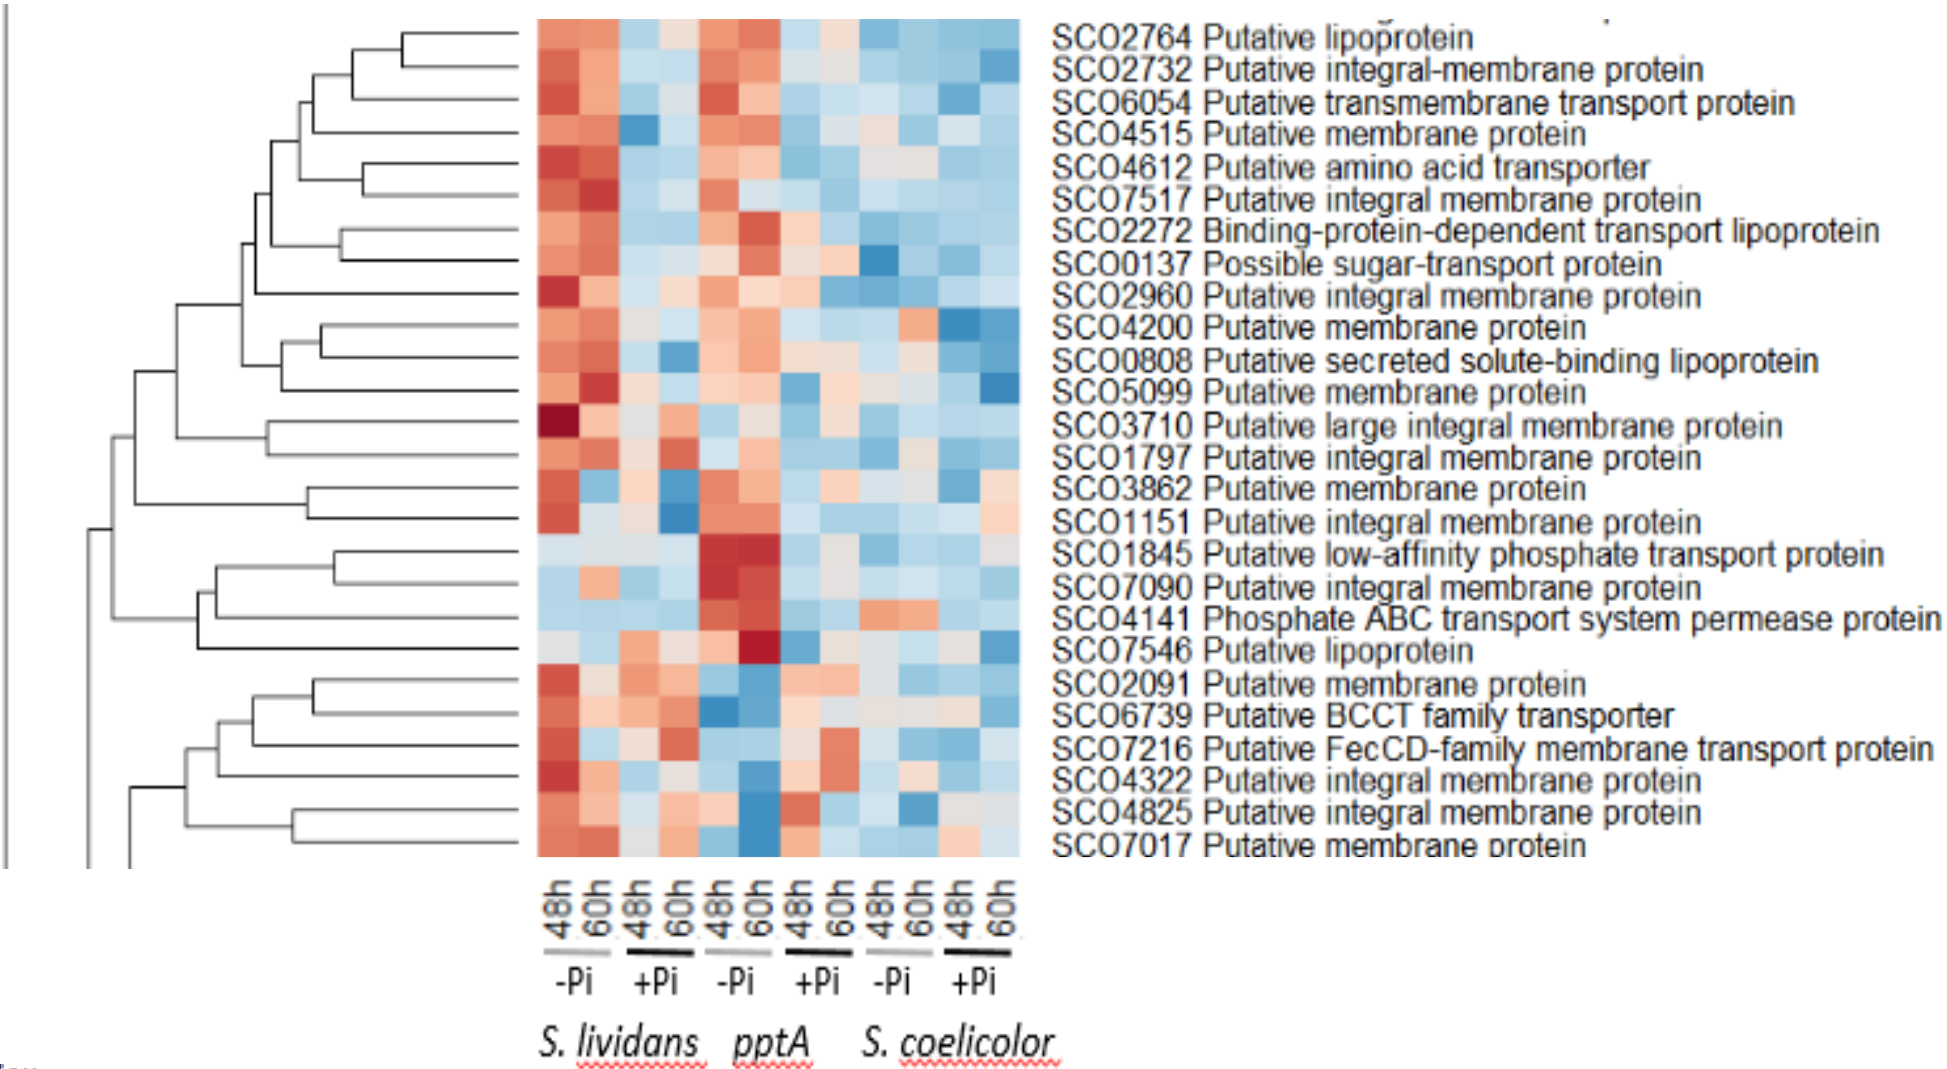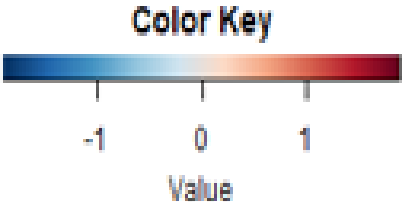

Figure S15D

TRANSPORT SYSTEMS INDUCED IN PHOSPHATE LIMITATION ONLY IN *S.COELICOLOR*

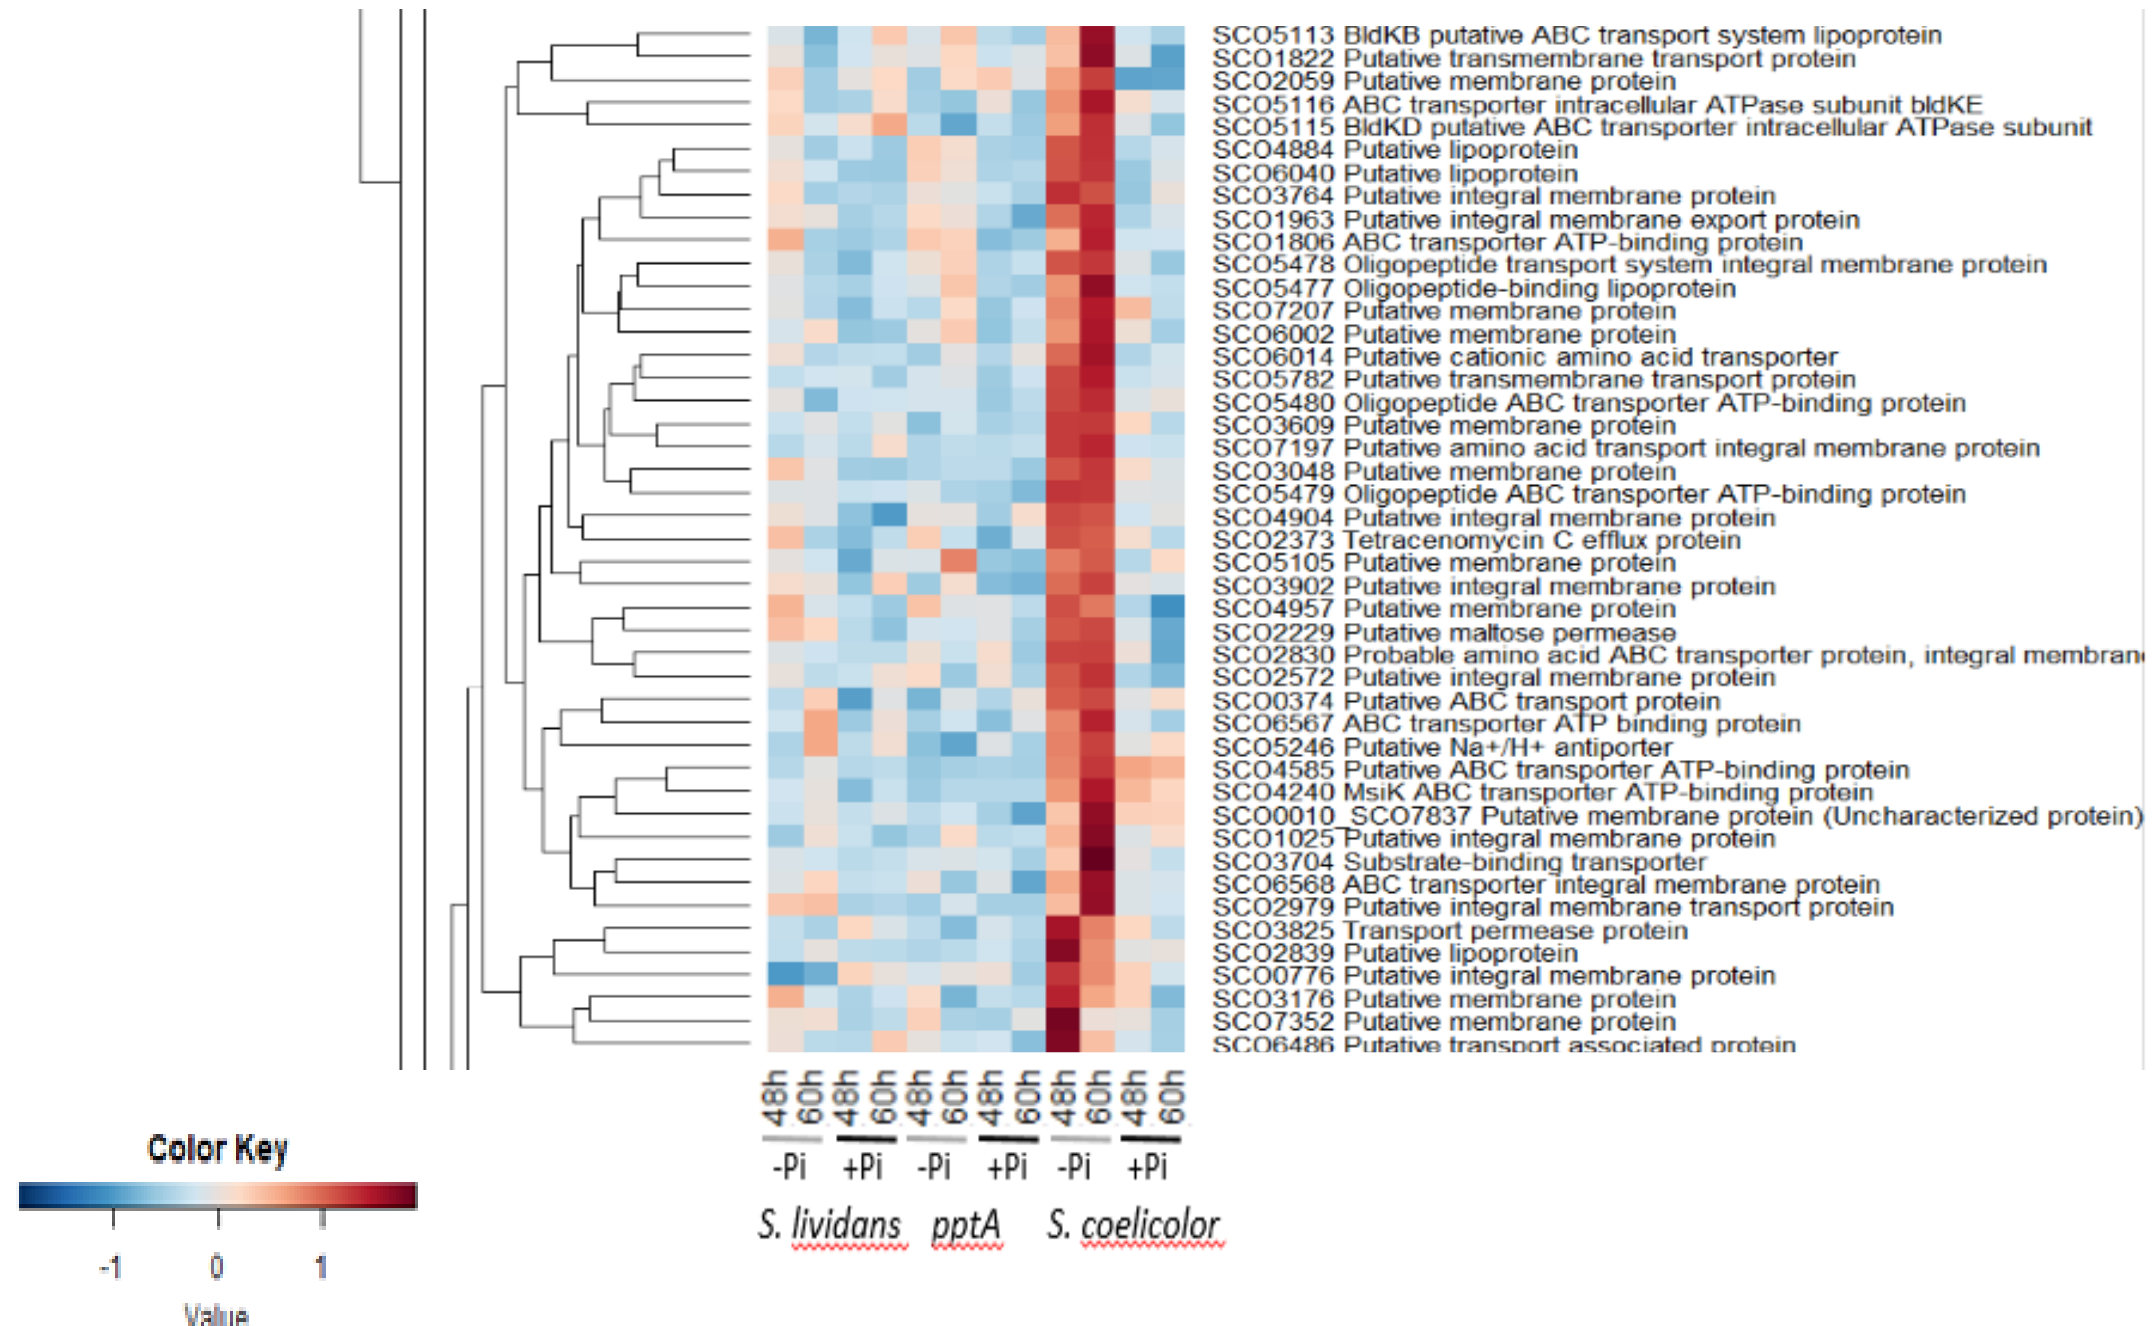

Figure S16A

TRANSPORT SYSTEMS INDUCED IN PHOSPHATE PROFICIENCY IN THE THREE STRAINS

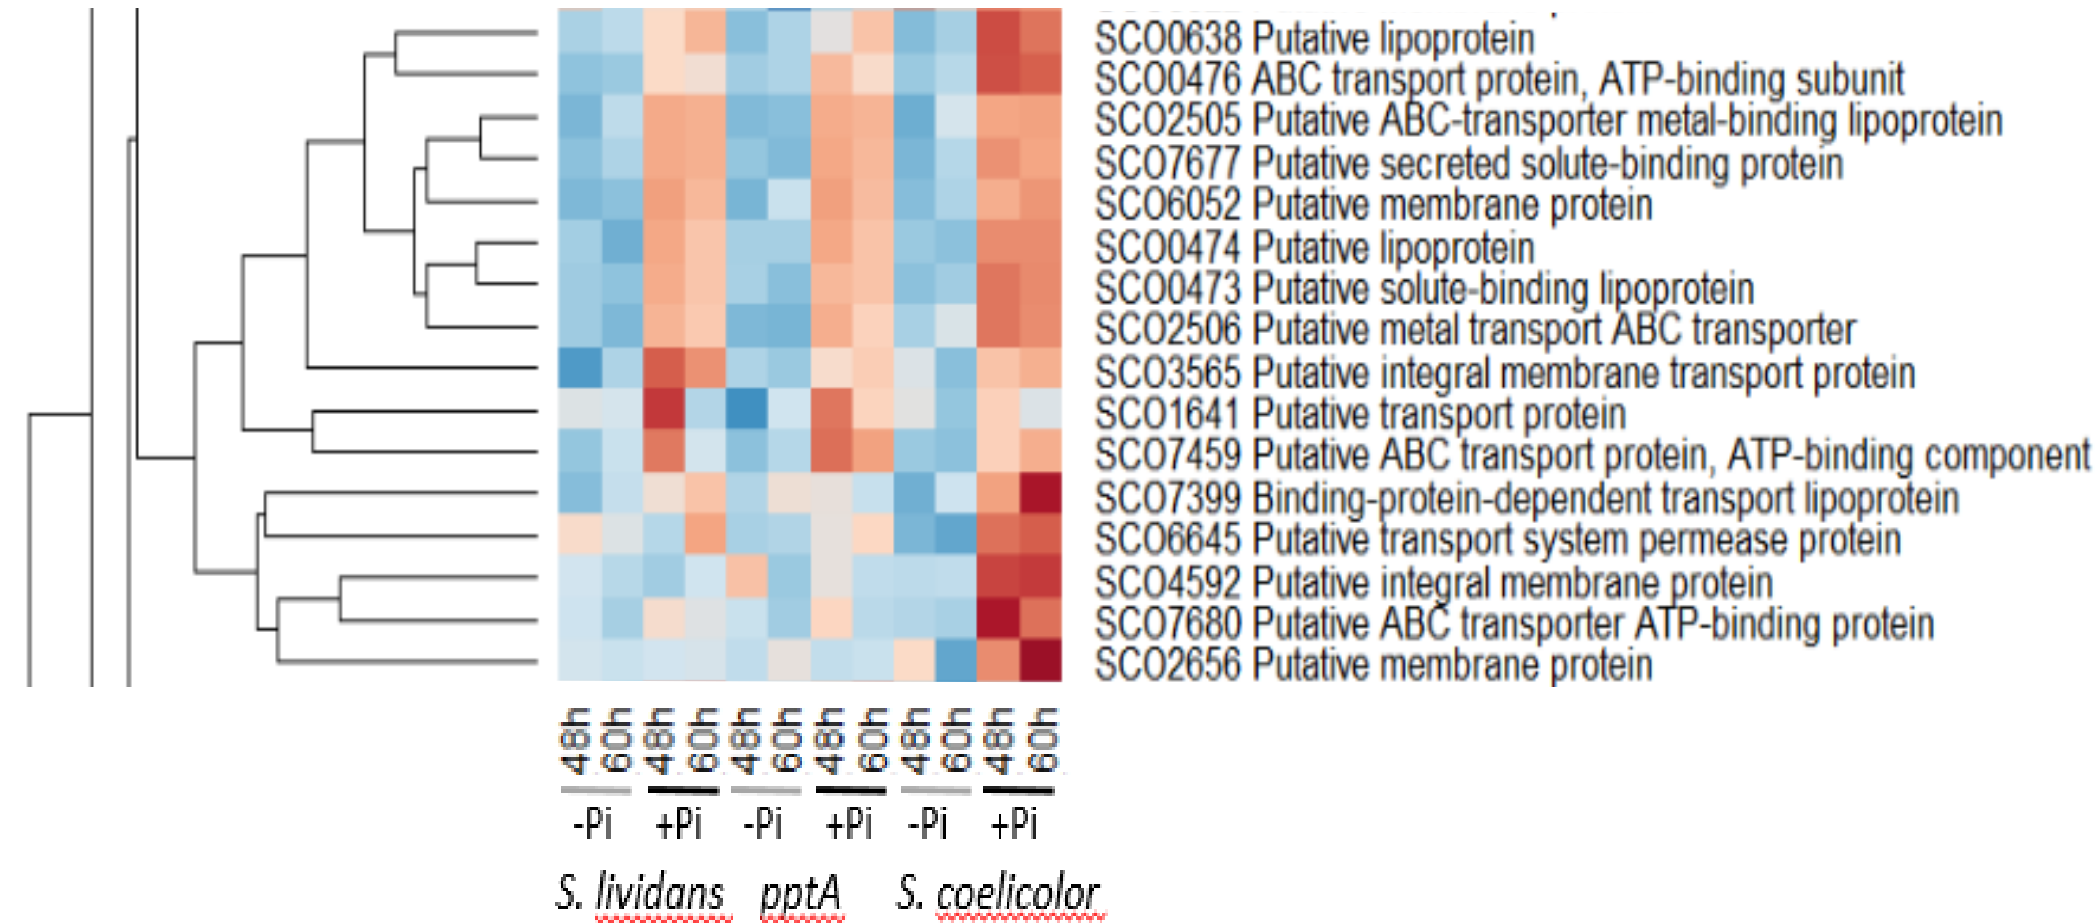

Figure S16B TRANSPORT SYSTEMS INDUCED IN PHOSPHATE PROFICIENCY MAINLY IN THE *S. LIVIDANS* STRAINS

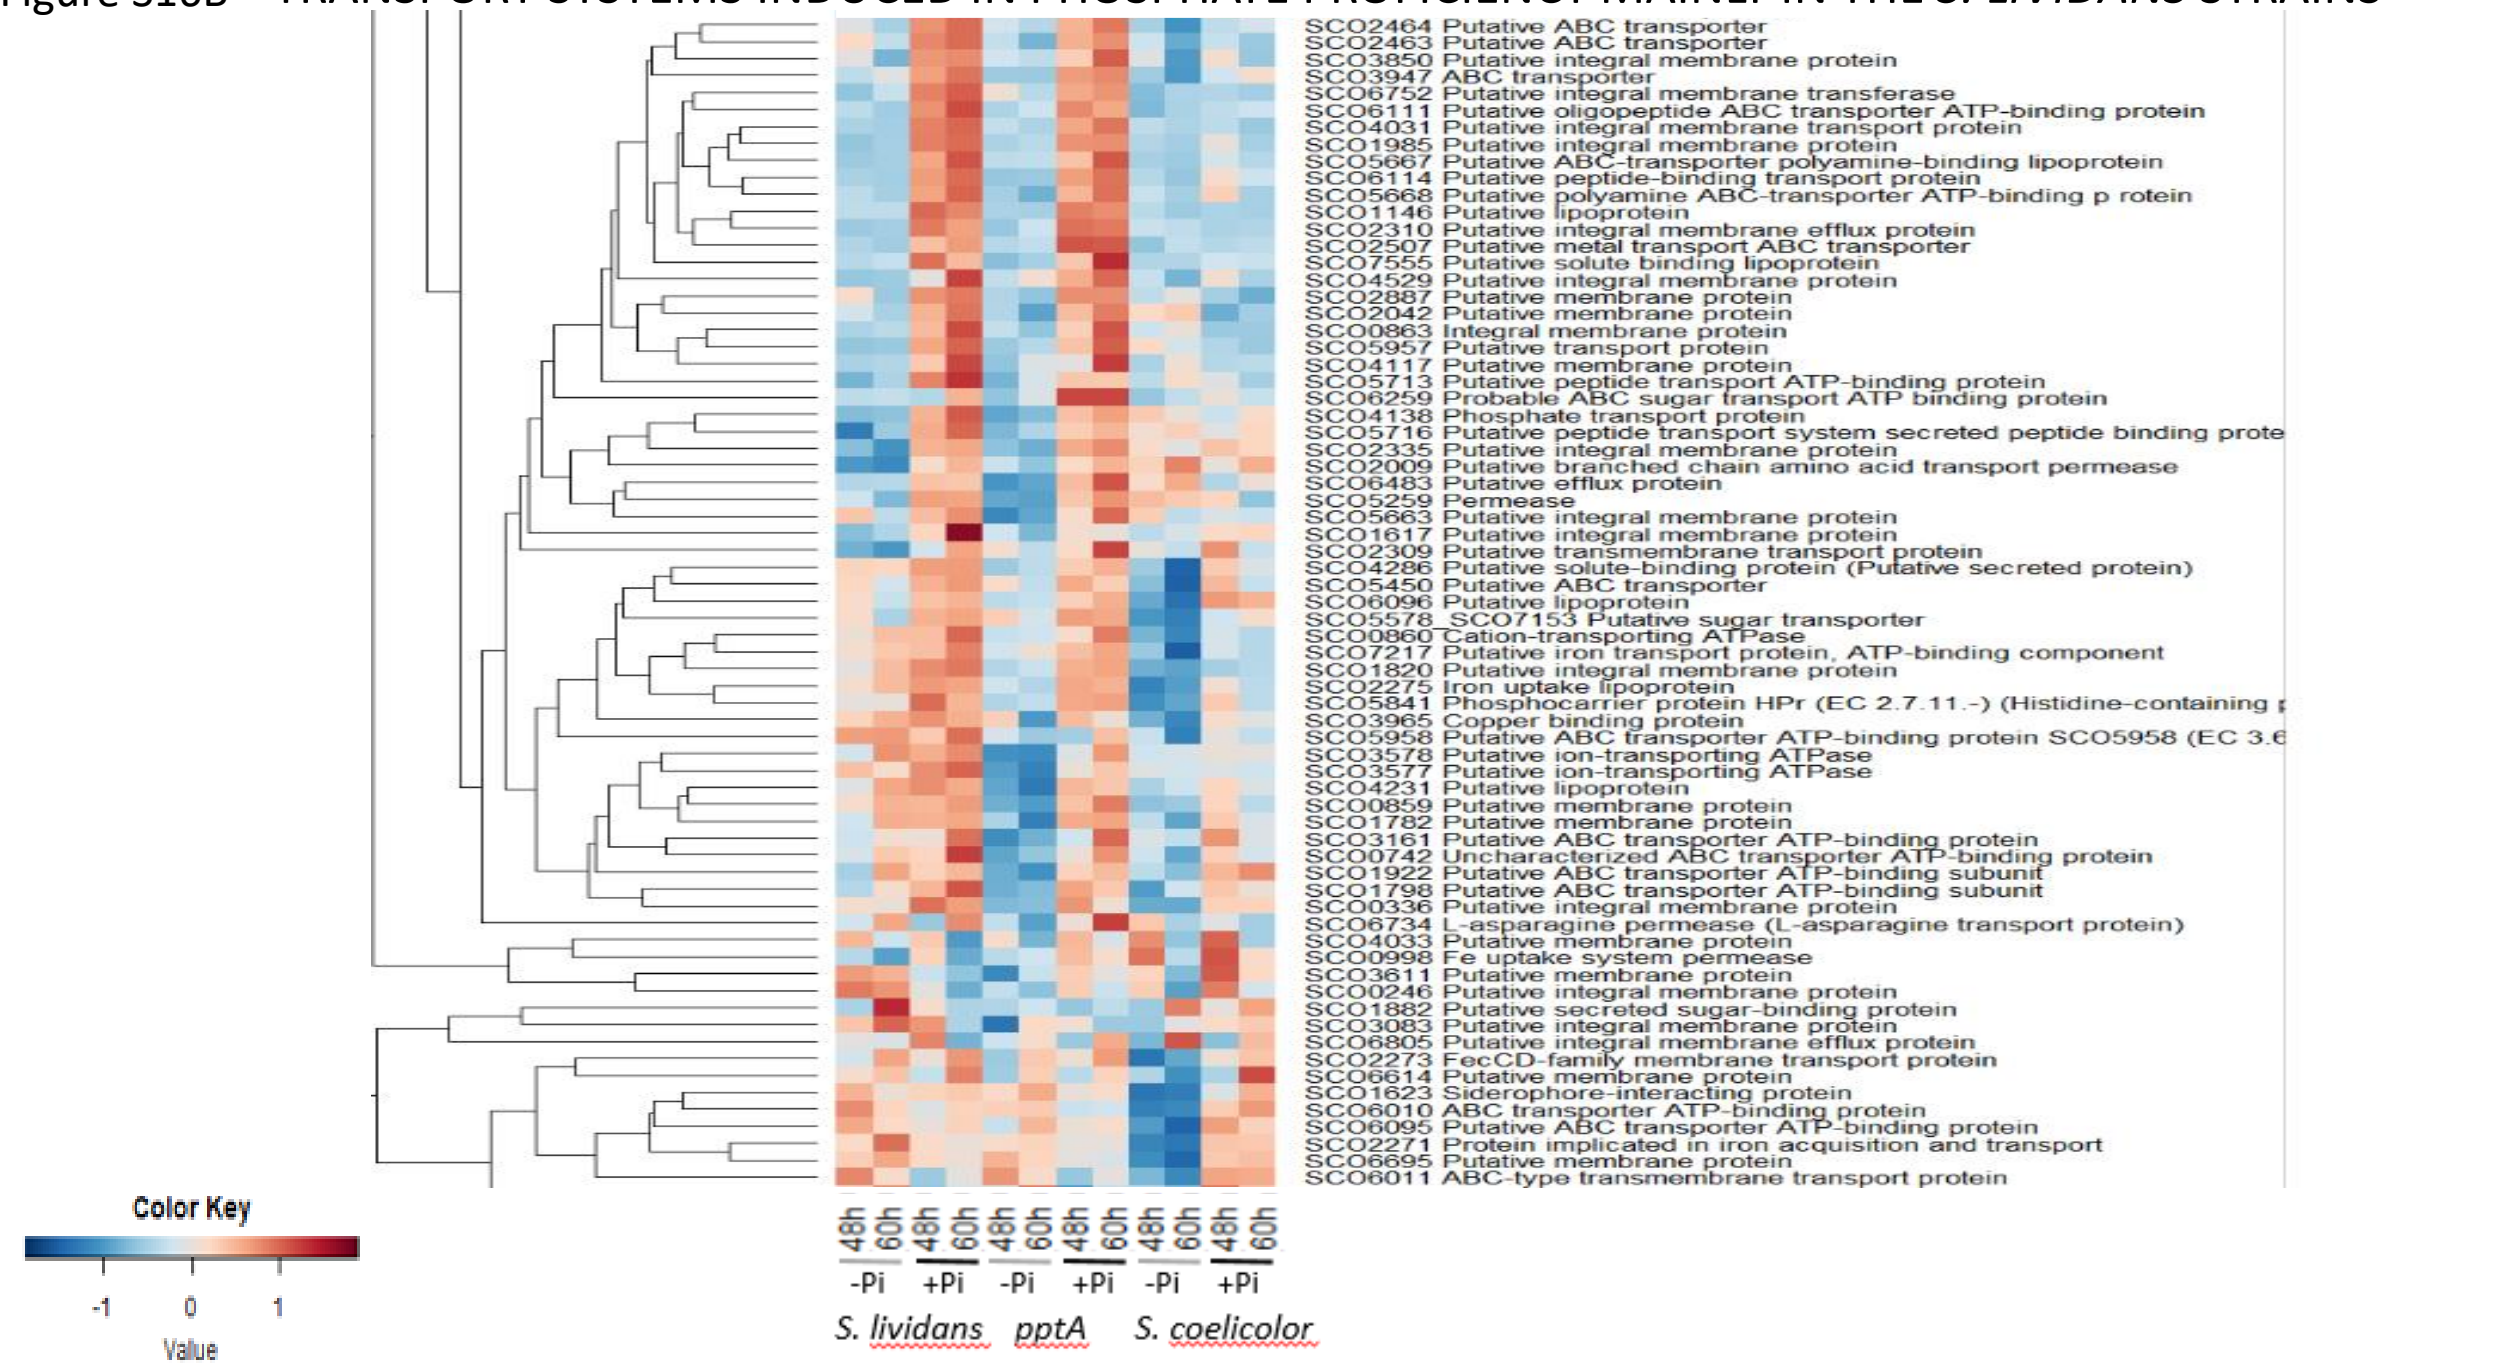

Figure S17A

TRANSPORTS SYSTEMS HIGHLY ABUNDANT IN BOTH PHOSPHATE CONDITIONS MAINLY THE *S. LIVIDANS* STRAINS

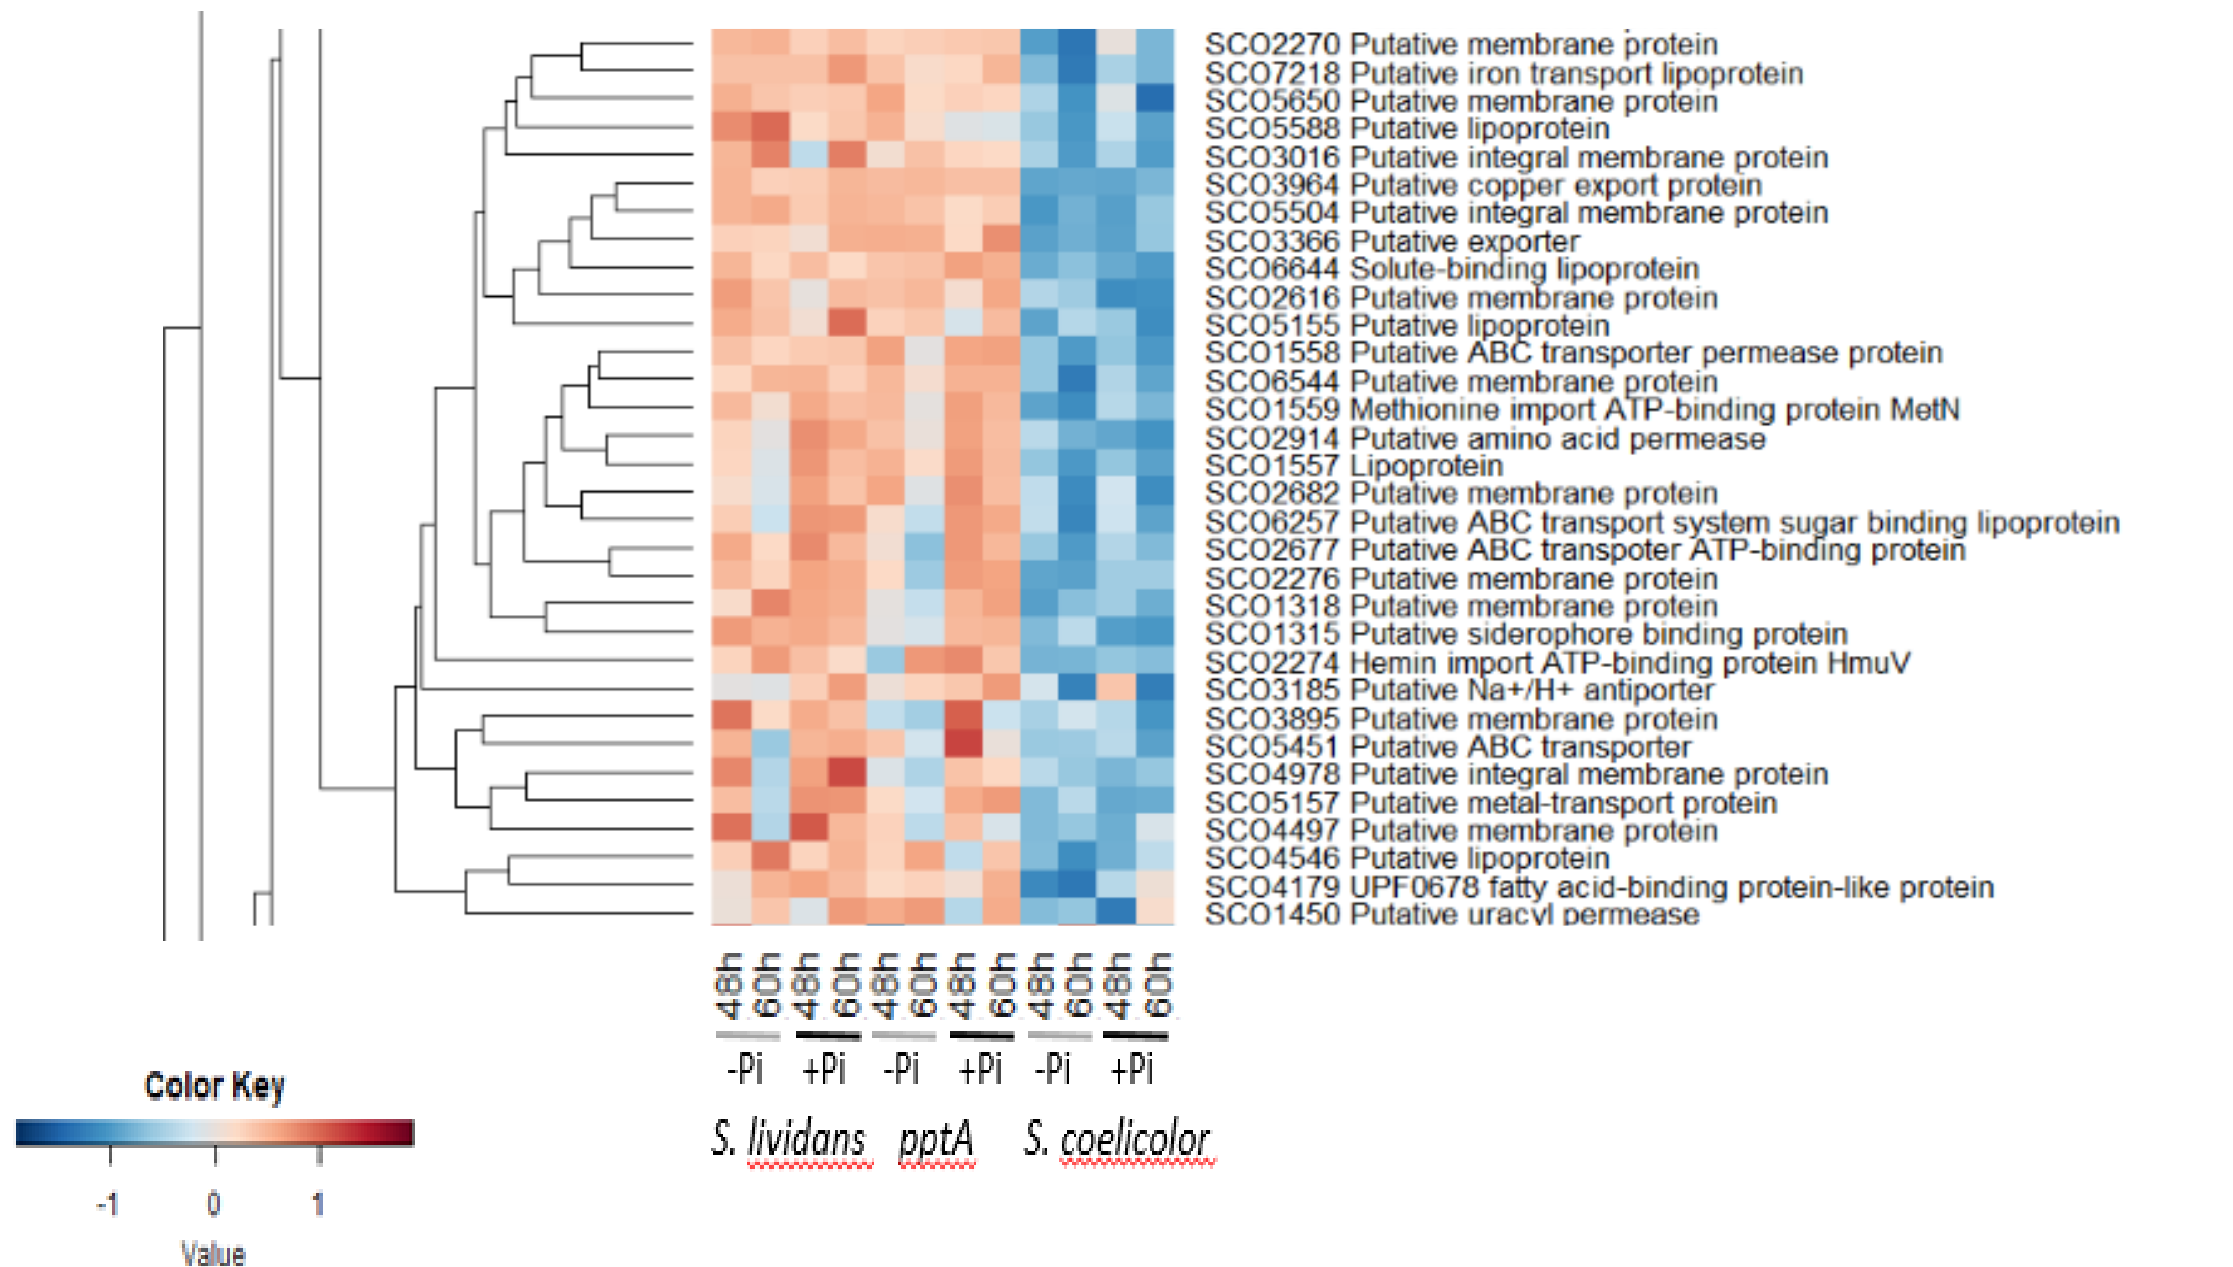

TRANSPORTS SYSTEMS HIGHLY ABUNDANT IN BOTH PHOSPHATE CONDITIONS, MAINLY IN *S. COELICOLOR*

Figure S17B

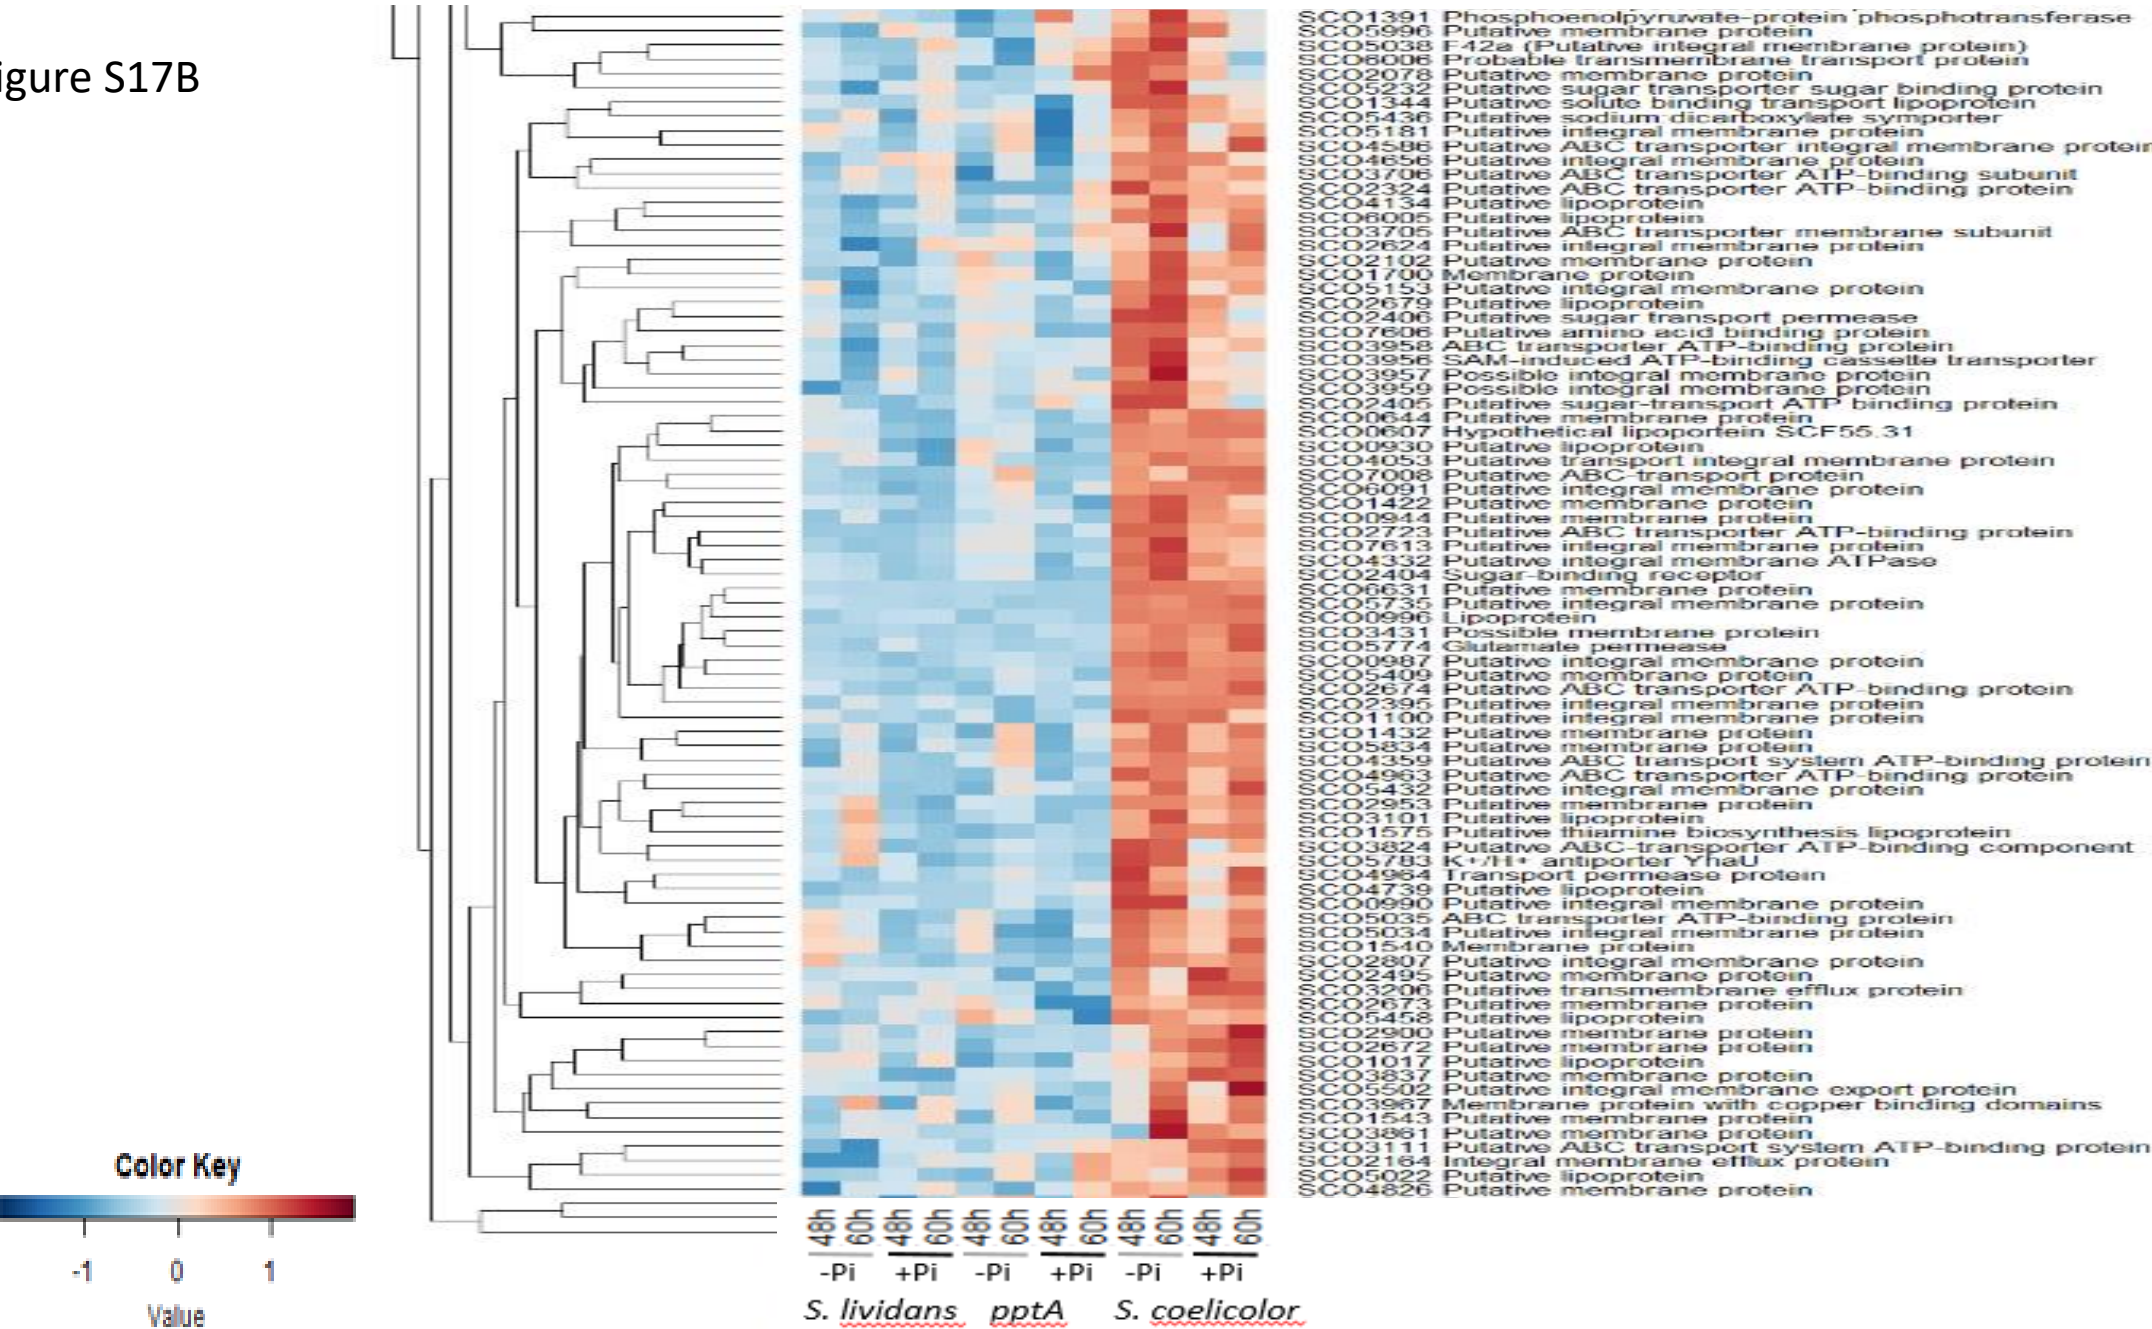

Figure S18A

TRANSPORT SYSTEMS POORLY ABUNDANT IN PHOSPHATE LIMITATION IN THE *PPTA* MUTANT OF *S. LIVIDANS*.

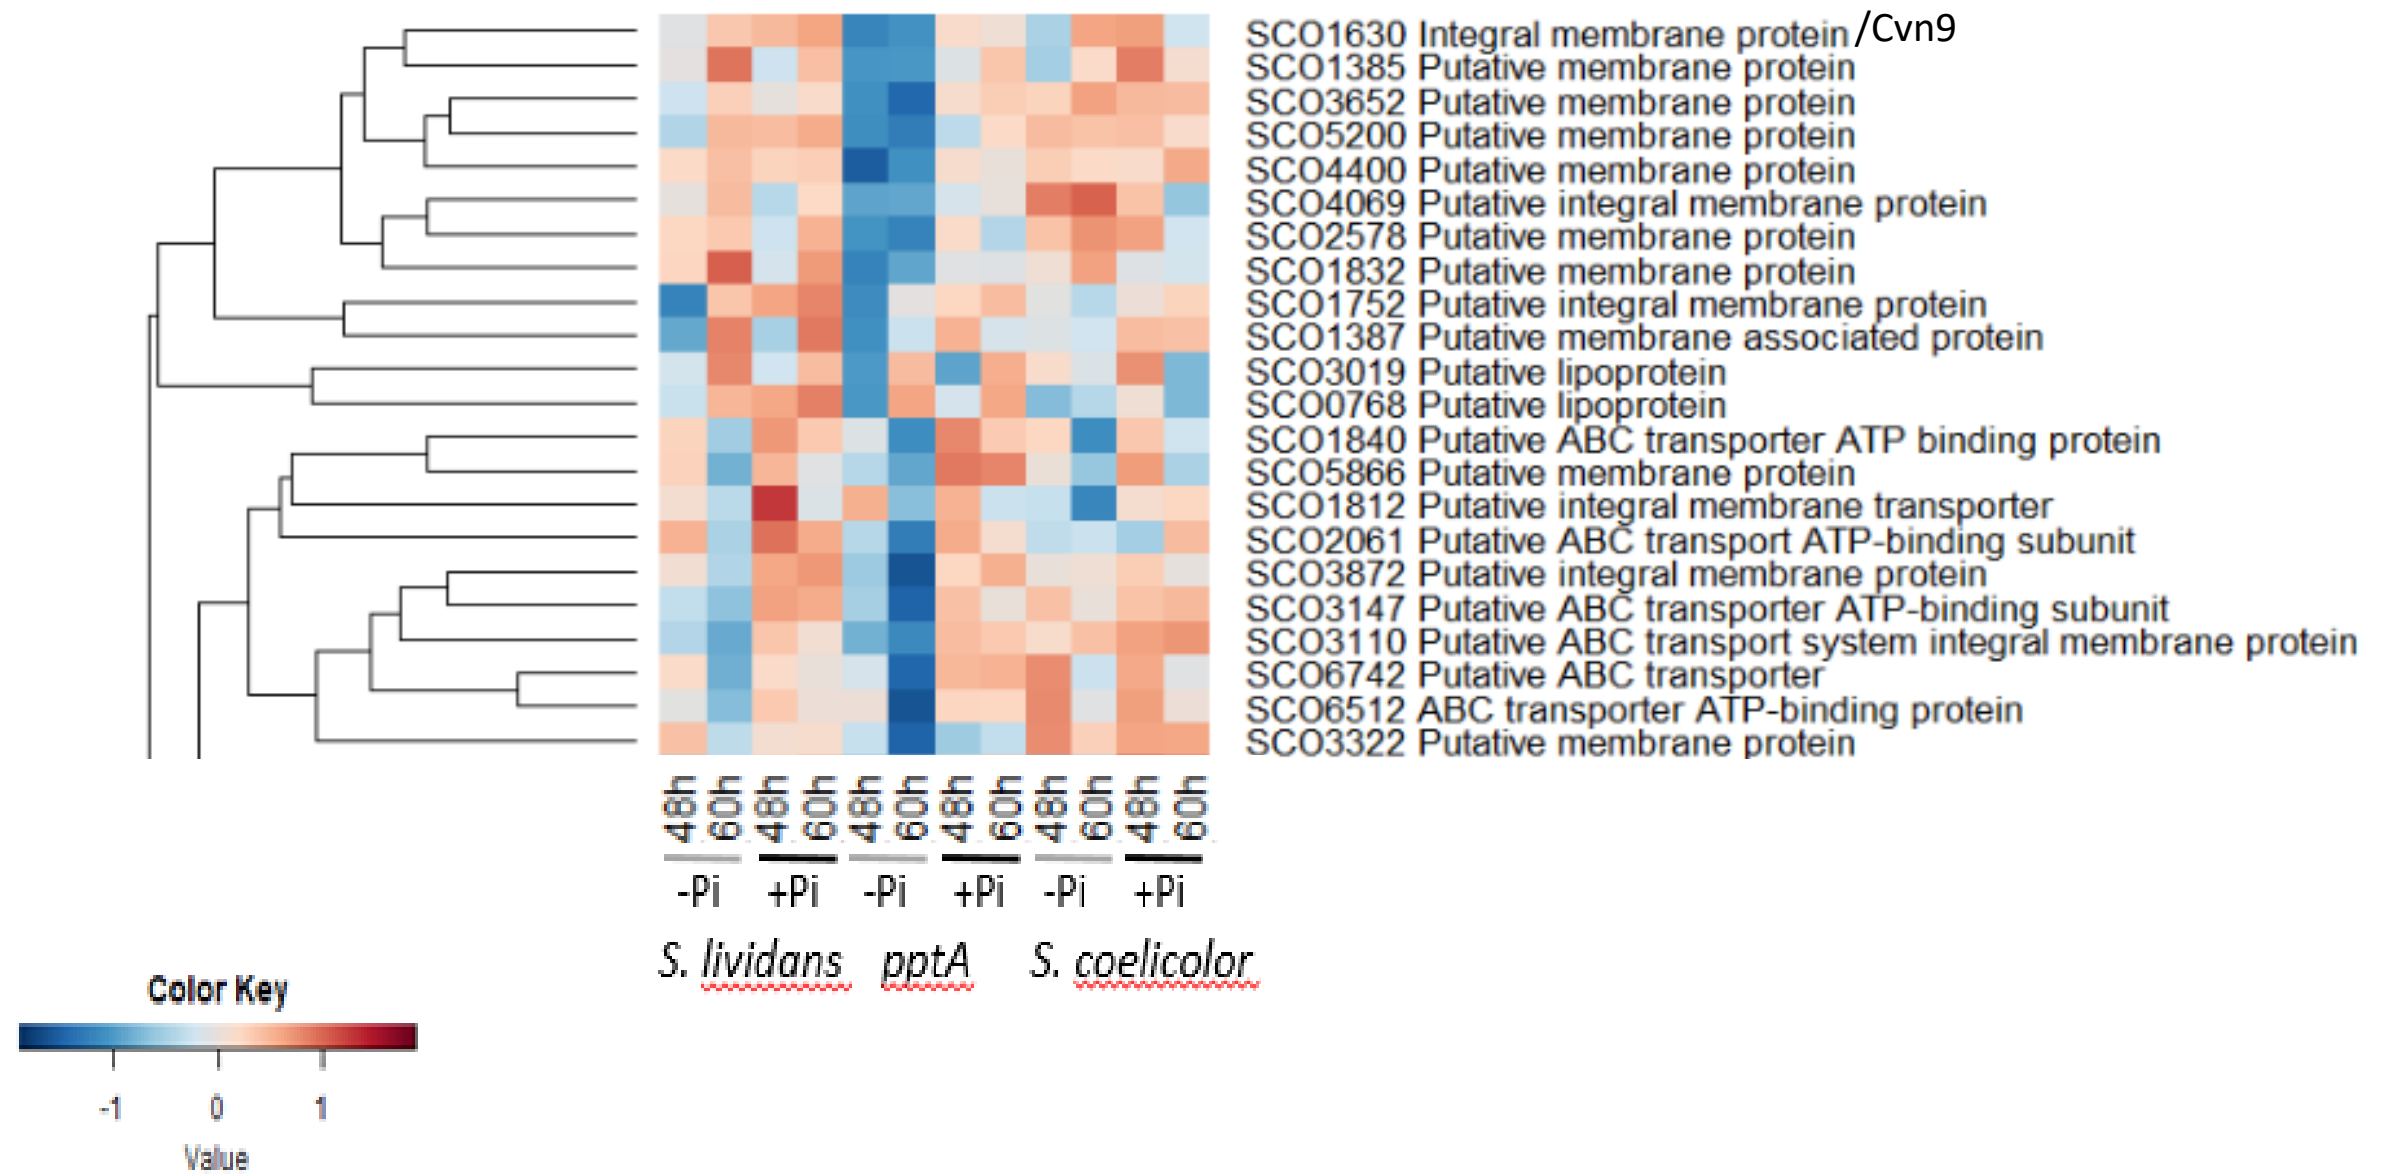

Figure S18B

TRANSPORT SYSTEMS POORLY ABUNDANT IN PHOSPHATE LIMITATION IN THE *PPTA* MUTANT OF *S. LIVIDANS*

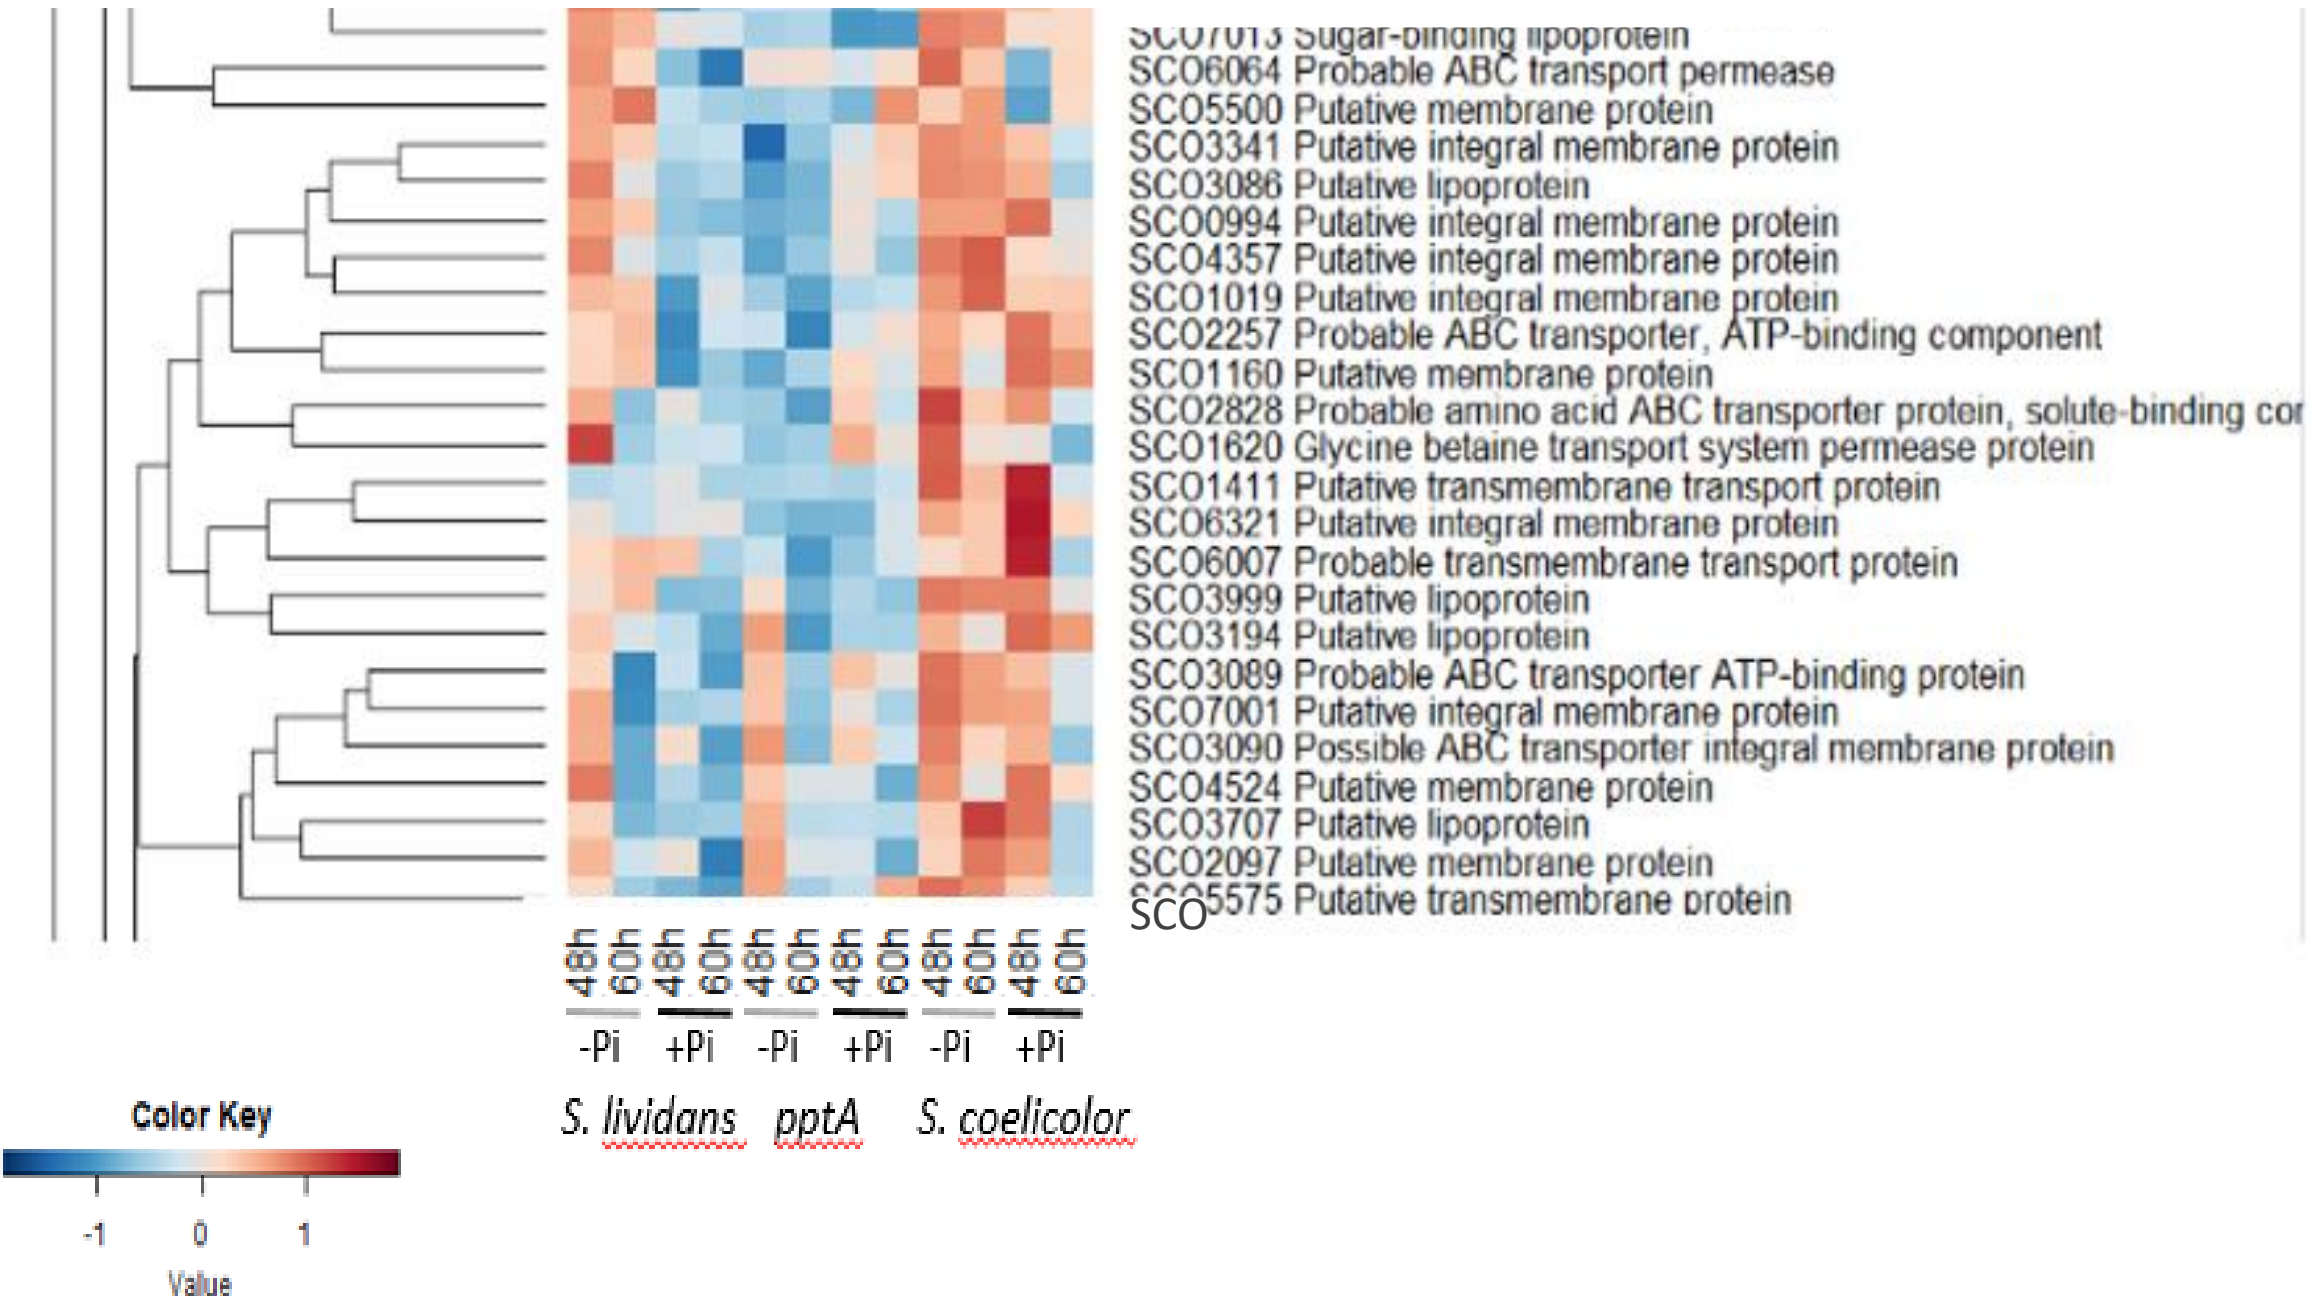

Figure S19

TRANSPORT SYSTEMS POORLY ABUNDANT IN PHOSPHATE PROFICIENCY IN *S.COELICOLOR*

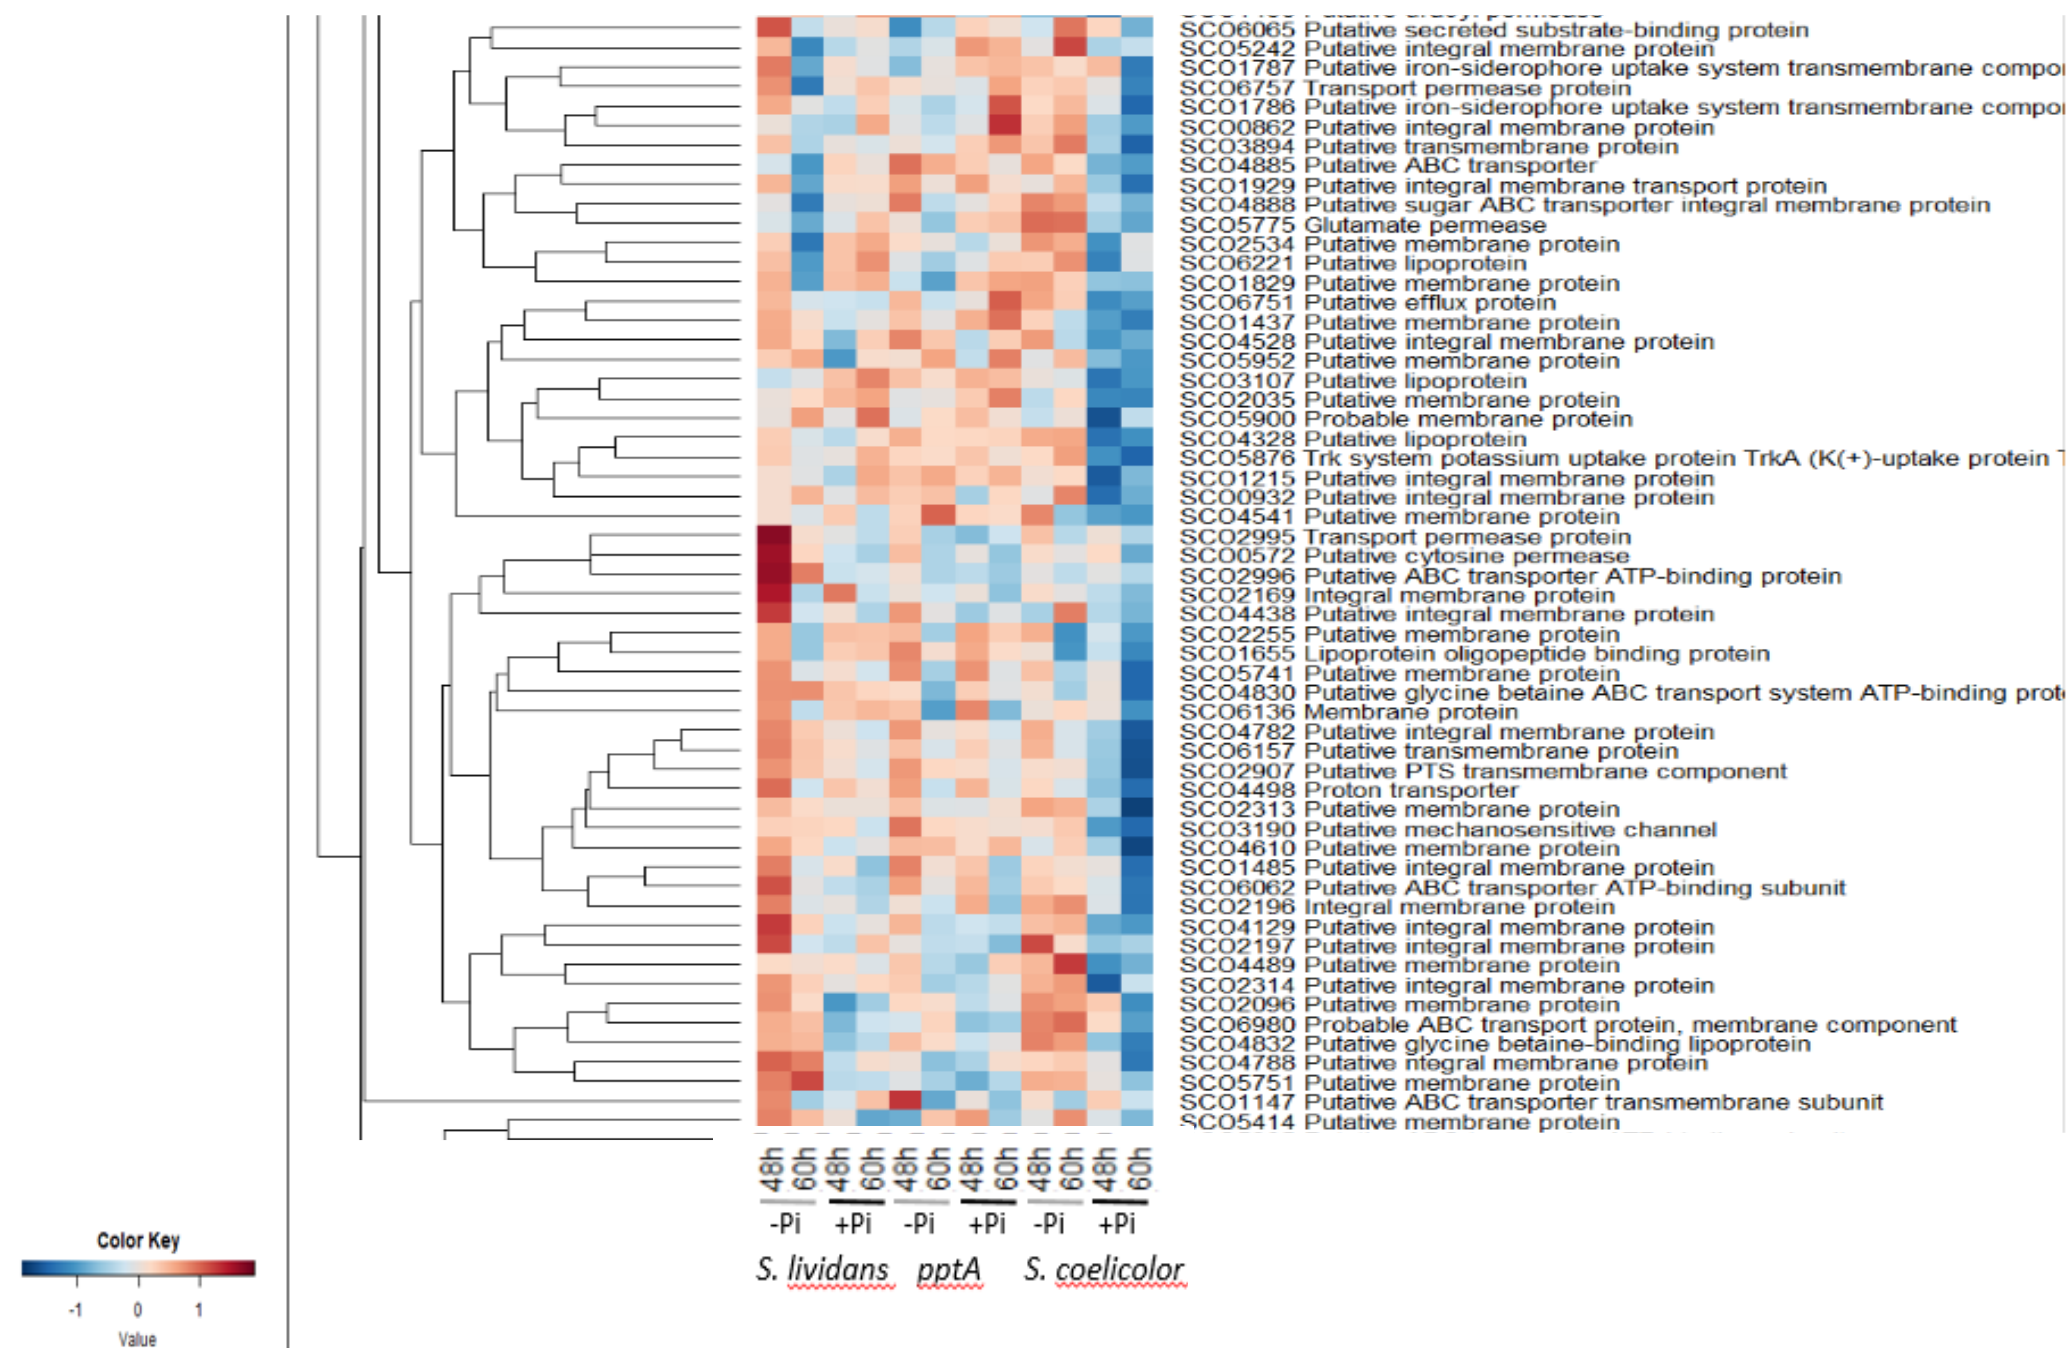

Supplement: Supplementary file [file 34460978]
